# Supplementary material for: Toward size-dependent thermodynamics of nanoparticles from quantum chemical calculations of small atomic clusters: a case study of (B2O3)n
Source: Royal Society of Chemistry journal article supplement (doi:10.1039/d2cp01672a), 2022-01-01
Supplement: d2cp01672a1.zip [file d2cp01672a1.zip]

## Supplementary material

Toward size-dependent thermodynamics of nanoparticles from quantum chemical calculations of small atomic clusters: A case study of  $(\text{B}_2\text{O}_3)_n$

Boris I. Loukhovitski<sup>a,b</sup>, Alexey V. Pelevkin<sup>a,c</sup>, Alexander S. Sharipov<sup>a,b</sup>  
[biloukhovitski@ciam.ru](mailto:biloukhovitski@ciam.ru) [avpelevkin@ciam.ru](mailto:avpelevkin@ciam.ru) [assharipov@ciam.ru](mailto:assharipov@ciam.ru)

<sup>a</sup> Central Institute of Aviation Motors, Moscow, Russia

<sup>b</sup> Joint Institute for High Temperatures of the Russian Academy of Sciences, Moscow, Russia

<sup>c</sup> Prokhorov General Physics Institute of the Russian Academy of Sciences, Moscow, Russia

Physical Chemistry Chemical Physics, 2022

### designations:

|                                 |                                                                    |
|---------------------------------|--------------------------------------------------------------------|
| Sym.                            | – group of symmetry                                                |
| $\Delta_f H_0^0$                | – enthalpy of formation at $T = 0$ K                               |
| $\Delta_f H_{298}^0$            | – enthalpy of formation at $T = 298$ K                             |
| $E_b$                           | – binding energy calculated via the electronic energy and ZPE only |
| $A_0, B_0, C_0$                 | – rotational constants                                             |
| $\omega_e^1, \dots, \omega_e^N$ | – vibrational frequencies                                          |
| $E_{\text{ZP}}$                 | – zero-point energy                                                |
| XYZ                             | – Cartesian structure (chemical element, x, y, z)                  |

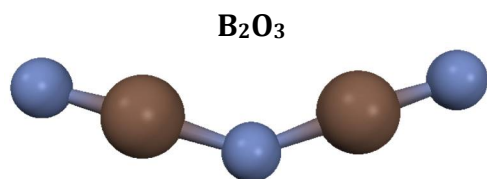

Sym.:  $C_{2v}$

$$\Delta_f H_0^0 = -837.6 \text{ kJ/mol}$$

$$\Delta_f H_{298}^0 = -822.7 \text{ kJ/mol}$$

$$E_b = 5.565 \text{ eV}$$

$$A_0, B_0, C_0 = 7.473 \times 10^{-2}, 7.704 \times 10^{-2}, 2.491 \text{ cm}^{-1}$$

$$\omega_e^1, \dots, \omega_e^9 = 106, 471, 482, 507, 553, 761, 1228, 2105, 2114 \text{ cm}^{-1}$$

$$E_{\text{ZP}} = 0.516 \text{ eV}$$

XYZ, Å:

|   |             |             |            |
|---|-------------|-------------|------------|
| B | -0.16118034 | 0.64417299  | 0.42795869 |
| B | 0.35136326  | -1.79917132 | 0.52625160 |
| O | 0.18804953  | -0.54091531 | 0.90158559 |
| O | 0.51243397  | -2.95538998 | 0.22780678 |
| O | -0.47276444 | 1.74105059  | 0.03860036 |

$(\text{B}_2\text{O}_3)_2$

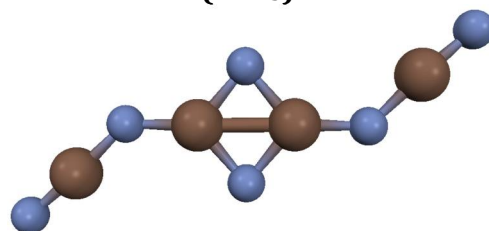

Sym.:  $C_{2h}$

$$\Delta_f H_0^0 = -1934.5 \text{ kJ/mol}$$

$$\Delta_f H_{298}^0 = -1907.3 \text{ kJ/mol}$$

$$E_b = 5.834 \text{ eV}$$

$$A_0, B_0, C_0 = 1.555 \times 10^{-2}, 1.639 \times 10^{-2}, 3.021 \times 10^{-1} \text{ cm}^{-1}$$

$$\omega_e^1, \dots, \omega_e^{24} = 37, 59, 91, 94, 146, 305, 427, 454, 514, 523, 529, 581, 632, 728, 740, 870, 964, 1075, 1106, 1350, 1448, 1644, 2094, 2105 \text{ cm}^{-1}$$

$$E_{\text{ZP}} = 1.148 \text{ eV}$$

XYZ, Å:

|   |            |             |             |
|---|------------|-------------|-------------|
| B | 0.49077749 | -2.44801217 | 1.07453102  |
| B | 0.65401463 | -0.34399575 | -0.19578022 |
| O | 0.47115235 | -3.20631096 | 2.01253822  |
| O | 0.50234108 | -1.66588814 | 0.00535306  |
| O | 0.64160425 | 0.35473729  | -1.40407929 |
| B | 0.85115431 | 1.40461500  | -0.50513404 |
| B | 1.01416986 | 3.50871032  | -1.77541052 |
| O | 0.86367580 | 0.70585884  | 0.70315859  |
| O | 1.00247499 | 2.72655224  | -0.70625575 |
| O | 1.03395223 | 4.26704233  | -2.71338409 |

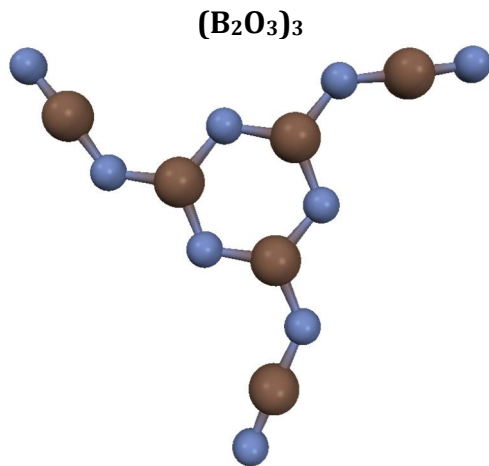

**(B<sub>2</sub>O<sub>3</sub>)<sub>3</sub>**

Sym.:  $C_{3h}$

$$\Delta_f H_0^0 = -3113.7 \text{ kJ/mol}$$

$$\Delta_f H_{298}^0 = -3073.9 \text{ kJ/mol}$$

$$E_b = 5.981 \text{ eV}$$

$$A_0, B_0, C_0 = 7.976 \times 10^{-3}, 1.594 \times 10^{-2}, 1.596 \times 10^{-2} \text{ cm}^{-1}$$

$$\omega_e^1, \dots, \omega_e^{39} = 39, 44, 47, 61, 64, 90, 152, 153, 156, 271, 274, 413, 415, 423, 475, 529, 529, 532, 571, 572, 653, 677, 677, 750, 811, 846, 847, 1043, 1118, 1119, 1255, 1401, 1402, 1422, 1424, 1495, 2093, 2094, 2104 \text{ cm}^{-1}$$

$$E_{ZP} = 1.800 \text{ eV}$$

XYZ, Å:

|   |             |             |             |
|---|-------------|-------------|-------------|
| B | -0.83387990 | 0.45733226  | 1.06338523  |
| O | -0.70867882 | 1.32665812  | 0.01209138  |
| O | -0.38195213 | -0.83247951 | 0.95786791  |
| B | -1.68089732 | 0.34336459  | 3.37585010  |
| O | -1.41615690 | 0.90792434  | 2.20940064  |
| O | -1.94410456 | -0.12454086 | 4.45741010  |
| B | 0.19939558  | -1.24940637 | -0.21035098 |
| B | -0.30202071 | 2.99945328  | -2.42898033 |
| O | -0.57564877 | 4.14992056  | -2.67286428 |
| B | -0.12359564 | 0.89837749  | -1.15123417 |
| O | 0.02045421  | 1.73444610  | -2.21686285 |
| O | 0.33228214  | -0.38806270 | -1.26838942 |
| B | 1.22750161  | -3.23532335 | -1.24660264 |
| O | 0.63881819  | -2.53620365 | -0.29053679 |
| O | 1.76547000  | -3.91710132 | -2.08548092 |

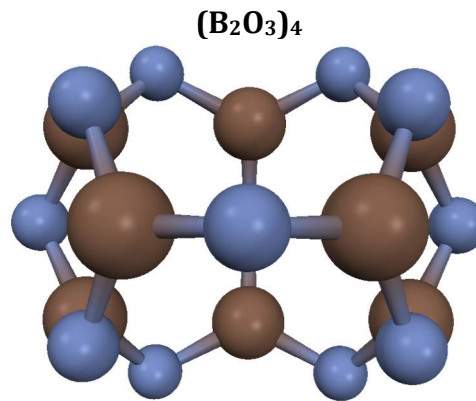

**(B<sub>2</sub>O<sub>3</sub>)<sub>4</sub>**

Sym.:  $C_{2v}$

$$\Delta_f H_0^0 = -4305.9 \text{ kJ/mol}$$

$$\Delta_f H_{298}^0 = -4267.4 \text{ kJ/mol}$$

$$E_b = 6.061 \text{ eV}$$

$$A_0, B_0, C_0 = 1.558 \times 10^{-2}, 1.562 \times 10^{-2}, 1.997 \times 10^{-2} \text{ cm}^{-1}$$

$$\omega_e^1, \dots, \omega_e^{54} = 92, 96, 98, 135, 190, 243, 249, 262, 314, 378, 390, 424, 431, 461, 461, 478, 480, 517, 545, 563, 591, 629, 642, 669, 694, 729, 754, 779, 780, 783, 786, 853, 877, 878, 919, 924, 975, 1014, 1110, 1113, 1124, 1126, 1140, 1251, 1295, 1326, 1331, 1331, 1367, 1371, 1379, 1387, 1401, 1431 \text{ cm}^{-1}$$

$$E_{ZP} = 2.577 \text{ eV}$$

XYZ, Å:

|   |             |             |             |
|---|-------------|-------------|-------------|
| B | -1.72696836 | -0.65068600 | -0.38552069 |
| B | 1.13233290  | 1.82359787  | -0.90085832 |
| O | 0.66452681  | -1.96491623 | 1.35342608  |
| O | -1.20438771 | -0.42994199 | -1.64428499 |
| O | -2.14240282 | 0.45327414  | 0.34114762  |
| B | 0.12705574  | -0.08969512 | -1.52897102 |
| B | -0.64785554 | -1.53653078 | 1.34483748  |
| O | 0.94767018  | -0.87130080 | -0.73752138 |
| O | -1.47867718 | -1.83461885 | 0.28207003  |
| O | 0.59554214  | 1.13105202  | -1.96765021 |
| B | -1.45653178 | 0.62781755  | 1.52907346  |
| B | 2.21101699  | 0.93721936  | 0.82997711  |
| O | 1.41385730  | 1.58779493  | 1.75767062  |
| O | 0.26175284  | 2.53554557  | -0.09154477 |
| O | -0.95511849 | 1.87021176  | 1.85226830  |
| B | 1.41356396  | -1.14632540 | 0.53430111  |
| B | 0.24799733  | 2.10422902  | 1.22219723  |
| O | 2.46495802  | -0.40484319 | 1.03089081  |
| O | -0.99009789 | -0.49361321 | 2.19010226  |
| O | 2.38683460  | 1.50818441  | -0.41582675 |

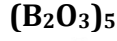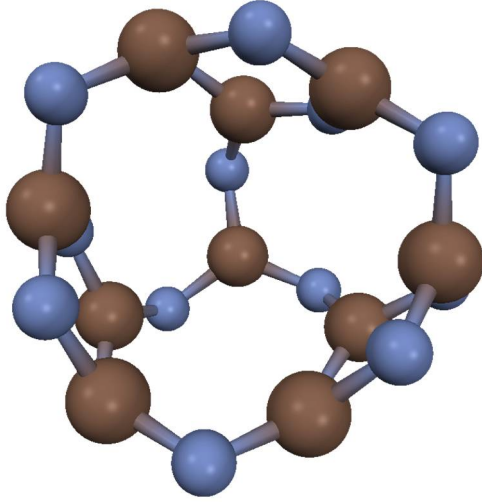

Sym.:  $C_3$

$$\Delta_f H_0^0 = -5584.7 \text{ kJ/mol}$$

$$\Delta_f H_{298}^0 = -5536.0 \text{ kJ/mol}$$

$$E_b = 6.144 \text{ eV}$$

$$A_0, B_0, C_0 = 9.669 \times 10^{-3}, 1.108 \times 10^{-2}, 1.109 \times 10^{-2} \text{ cm}^{-1}$$

$\omega_e^1, \dots, \omega_e^{69} = 78, 79, 83, 143, 153, 154, 169, 170, 191, 248, 248, 303, 319, 319, 410, 420, 420, 432, 445, 462, 462, 484, 524, 524, 549, 555, 556, 624, 626, 663, 673, 694, 695, 744, 745, 770, 771, 772, 781, 823, 835, 836, 868, 889, 890, 964, 964, 1000, 1016, 1146, 1150, 1151, 1162, 1166, 1166, 1303, 1304, 1327, 1328, 1333, 1350, 1378, 1379, 1392, 1394, 1415, 1431, 1431, 1455 \text{ cm}^{-1}$

$$E_{ZP} = 3.267 \text{ eV}$$

XYZ, Å:

|   |             |             |             |
|---|-------------|-------------|-------------|
| B | 0.72423044  | 1.47334590  | 1.21501126  |
| O | 0.01012862  | 1.21882900  | 2.36589095  |
| O | 0.20360111  | 2.26083817  | 0.22410668  |
| O | 1.03410095  | -0.93561121 | 2.48732221  |
| B | 1.87594256  | -0.59603751 | 1.45181685  |
| O | 1.83371049  | 0.69333933  | 0.95786171  |
| O | 2.52459268  | -1.56560492 | 0.72485835  |
| B | -1.96834205 | -0.75369247 | 1.42979363  |
| O | -2.13211032 | 0.44169602  | 0.75703700  |
| O | -2.18287315 | -1.93074755 | 0.74827740  |
| B | -0.09105991 | -0.13624660 | 2.60663487  |
| O | -1.32443857 | -0.74949731 | 2.64404763  |
| B | -0.12899192 | 1.70694700  | -0.99695226 |
| B | -2.11242524 | 0.44267005  | -0.62296809 |
| O | -1.45156388 | 1.43758401  | -1.29130494 |
| O | -2.51174981 | -0.70412510 | -1.27465201 |
| O | 0.10051827  | -0.96781531 | -2.21649315 |
| B | -2.05621654 | -1.83506050 | -0.62800877 |
| O | -1.20212391 | -2.70867545 | -1.26539955 |
| B | 2.09096429  | -1.65339627 | -0.58014336 |
| O | 1.16127478  | -2.63067120 | -0.89689797 |
| O | 2.31228168  | -0.61566171 | -1.46246400 |
| B | 0.03222677  | -2.16739036 | -1.53483109 |
| B | 1.12628867  | -0.09051982 | -1.92864345 |
| O | 0.86772701  | 1.25027685  | -1.83749388 |

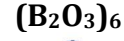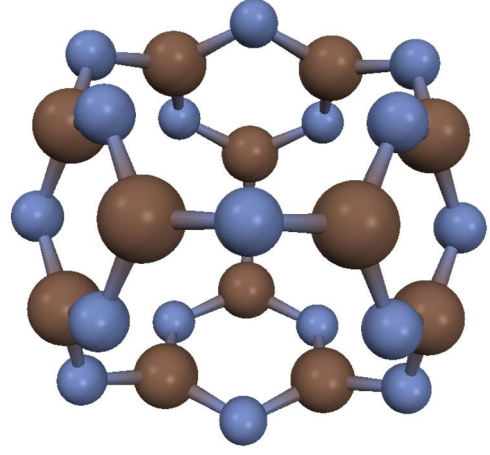

Sym.:  $T_d$

$$\Delta_f H_0^0 = -6877.3 \text{ kJ/mol}$$

$$\Delta_f H_{298}^0 = -6816.1 \text{ kJ/mol}$$

$$E_b = 6.205 \text{ eV}$$

$$A_0, B_0, C_0 = 7.015 \times 10^{-3}, 7.017 \times 10^{-3}, 7.021 \times 10^{-3} \text{ cm}^{-1}$$

$\omega_e^1, \dots, \omega_e^{84} = 50, 53, 54, 71, 72, 74, 136, 136, 171, 172, 172, 177, 178, 212, 257, 258, 258, 421, 421, 422, 425, 425, 442, 443, 443, 449, 467, 468, 468, 502, 552, 552, 553, 601, 602, 602, 662, 662, 664, 726, 726, 727, 774, 774, 780, 780, 781, 785, 825, 826, 860, 880, 880, 944, 945, 947, 1012, 1013, 1013, 1180, 1181, 1181, 1182, 1197, 1198, 1199, 1311, 1311, 1341, 1342, 1342, 1360, 1361, 1361, 1399, 1415, 1416, 1416, 1438, 1439, 1444, 1445, 1445 \text{ cm}^{-1}$

$$E_{ZP} = 3.935 \text{ eV}$$

XYZ, Å:

|   |             |             |             |
|---|-------------|-------------|-------------|
| B | 0.95556182  | -2.14153959 | 1.46214185  |
| O | 1.43606103  | -2.50024968 | 0.22171364  |
| B | -1.36226620 | -1.90924137 | 1.47313880  |
| O | -1.76781177 | -0.79569606 | 2.17602586  |
| O | -0.26012629 | -2.61143388 | 1.88482700  |
| B | 2.19721372  | -1.58581716 | -0.47288060 |
| B | 1.09967386  | -0.80071045 | -2.37111122 |
| O | 2.83397884  | -0.57769696 | 0.21730503  |
| O | 2.12608553  | -1.53701035 | -1.84036952 |
| O | -0.14671099 | -1.36868842 | -2.52053508 |
| B | 1.38785545  | 1.89981775  | 1.45579331  |
| O | 1.44896773  | 2.49846748  | 0.21635089  |
| B | 2.34256456  | -0.22548313 | 1.45532157  |
| O | 1.58267954  | -1.13302172 | 2.16048084  |
| O | 2.40492531  | 1.07948568  | 1.86827281  |
| B | 0.27128360  | 2.69587781  | -0.47080401 |
| B | 0.12813533  | 1.35531910  | -2.37061432 |
| O | -0.91588886 | 2.73749217  | 0.22703318  |
| O | 0.25653726  | 2.61135137  | -1.83826627 |
| O | 1.24205379  | 0.56036666  | -2.52960743 |
| B | -2.32760469 | 0.24926958  | 1.47422800  |
| O | -2.88260362 | 0.00785249  | 0.23656896  |
| B | -0.96499444 | 2.13824003  | 1.46657544  |
| O | 0.20639915  | 1.93717234  | 2.16344252  |
| O | -2.12191176 | 1.53859210  | 1.88987931  |
| B | -2.47430877 | -1.11190374 | -0.45469795 |
| B | -1.25359364 | -0.56378534 | -2.36209516 |
| O | -1.91721531 | -2.16433266 | 0.23831254  |
| O | -2.40192315 | -1.08109195 | -1.82260424 |
| O | -1.12301205 | 0.79839890  | -2.52133273 |

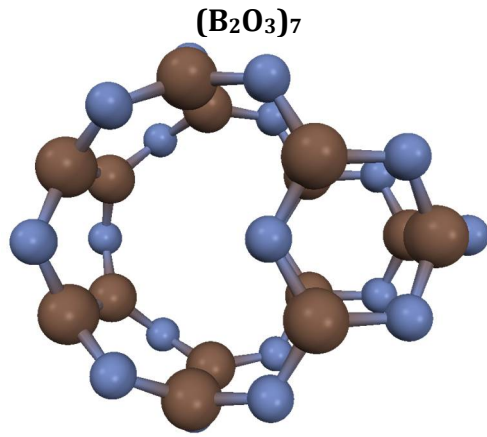

Sym.:  $C_{2v}$

$$\Delta_f H_0^0 = -8015.0 \text{ kJ/mol}$$

$$\Delta_f H_{298}^0 = -7942.7 \text{ kJ/mol}$$

$$E_b = 6.203 \text{ eV}$$

$$A_0, B_0, C_0 = 4.648 \times 10^{-3}, 5.171 \times 10^{-3}, 6.437 \times 10^{-3} \text{ cm}^{-1}$$

$\omega_e^1, \dots, \omega_e^{99} = 56, 78, 83, 86, 88, 101, 108, 108, 111, 145, 153, 165, 183, 183, 204, 217, 222, 245, 259, 281, 284, 313, 323, 331, 398, 415, 426, 428, 434, 434, 458, 472, 488, 491, 492, 506, 559, 569, 576, 587, 593, 596, 610, 629, 646, 667, 669, 680, 686, 711, 712, 723, 735, 739, 758, 772, 781, 797, 811, 813, 839, 856, 859, 874, 887, 932, 951, 976, 978, 1032, 1103, 1176, 1178, 1187, 1187, 1199, 1213, 1216, 1226, 1294, 1295, 1321, 1322, 1331, 1336, 1354, 1356, 1359, 1380, 1384, 1387, 1410, 1426, 1430, 1460, 1462, 1465, 1502, 1504 \text{ cm}^{-1}$

$$E_{ZP} = 4.577 \text{ eV}$$

XYZ, Å:

|   |             |             |             |
|---|-------------|-------------|-------------|
| B | -1.99216101 | -0.65785268 | 1.42068309  |
| O | -2.33152685 | -1.76487925 | 0.71762427  |
| O | -1.81219095 | -0.71546878 | 2.78142133  |
| B | 1.40513342  | -1.74853019 | 1.34729648  |
| O | 1.27697892  | -1.70783717 | 2.71450878  |
| O | 1.01273648  | -2.83821611 | 0.64484051  |
| O | 2.00456995  | 0.55183171  | 2.75308228  |
| B | 1.18641054  | -0.44053953 | 3.25321556  |
| B | -0.97940013 | 0.25524090  | 3.29960311  |
| O | 0.11480140  | -0.10913956 | 4.04989326  |
| O | -1.08523709 | 1.54448621  | 2.81909154  |
| O | 1.77382796  | -0.58576940 | 0.68247568  |
| B | -1.25270155 | 1.64381931  | 1.45910626  |
| O | -1.64246243 | 0.51078860  | 0.75607602  |
| B | 2.14429385  | 0.55312493  | 1.38644296  |
| O | 2.46431881  | 1.68938072  | 0.72198701  |
| O | -0.87805724 | 2.76236219  | 0.79343505  |
| B | 2.00200096  | 2.02287849  | -0.53303917 |
| B | -0.35711879 | 2.78020945  | -0.48259900 |
| O | 2.46613852  | 1.34876088  | -1.63162358 |
| O | 0.99276556  | 2.94125425  | -0.64322818 |
| B | 0.45410150  | -2.80104270 | -0.61486902 |
| B | -1.90566518 | -2.04367963 | -0.56337892 |
| O | -0.90012181 | -2.95537475 | -0.74189700 |
| O | -2.40136080 | -1.32341386 | -1.61800390 |
| B | 0.87195028  | -1.48047590 | -2.56008344 |
| B | -1.55489651 | -0.70212377 | -2.50724627 |
| O | 1.23385994  | -2.48928570 | -1.69751293 |
| O | -0.42605817 | -1.32544573 | -2.96529704 |
| O | -1.79830802 | 0.62026929  | -2.78292846 |
| B | 1.59343841  | 0.76630643  | -2.52203626 |
| B | -0.83346272 | 1.54483110  | -2.46937880 |
| O | 1.82772220  | -0.54268761 | -2.86196823 |
| O | 0.45193127  | 1.40823489  | -2.91887234 |
| O | -1.16909675 | 2.51542889  | -1.55393564 |

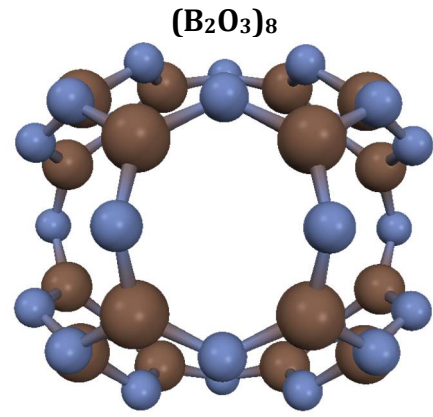

Sym.:  $C_{2v}$

$$\Delta_f H_0^0 = -9288.2 \text{ kJ/mol}$$

$$\Delta_f H_{298}^0 = -9207.6 \text{ kJ/mol}$$

$$E_b = 6.236 \text{ eV}$$

$$A_0, B_0, C_0 = 3.486 \times 10^{-3}, 3.771 \times 10^{-3}, 4.267 \times 10^{-3} \text{ cm}^{-1}$$

$\omega_e^1, \dots, \omega_e^{114} = 25, 32, 35, 59, 66, 86, 92, 101, 111, 114, 127, 140, 151, 166, 169, 183, 189, 190, 191, 197, 202, 220, 260, 269, 280, 304, 328, 362, 387, 399, 403, 415, 422, 427, 449, 454, 482, 482, 491, 505, 516, 518, 531, 544, 545, 593, 618, 621, 623, 638, 657, 657, 669, 673, 680, 714, 714, 721, 734, 744, 753, 757, 764, 769, 775, 777, 815, 815, 821, 831, 838, 846, 848, 866, 926, 947, 952, 963, 1006, 1008, 1026, 1084, 1189, 1194, 1197, 1200, 1207, 1214, 1217, 1224, 1227, 1304, 1311, 1313, 1334, 1341, 1342, 1347, 1360, 1365, 1379, 1393, 1400, 1410, 1413, 1417, 1440, 1440, 1450, 1458, 1467, 1470, 1470, 1474 \text{ cm}^{-1}$

$$E_{ZP} = 5.259 \text{ eV}$$

XYZ, Å:

|   |             |             |             |
|---|-------------|-------------|-------------|
| B | -0.50544656 | 1.51608782  | 1.89231952  |
| O | -0.23904294 | 0.58431331  | 2.85064279  |
| B | -2.22782468 | 2.42192588  | 0.56220408  |
| O | -1.32004141 | 2.81079722  | -0.40013396 |
| O | -1.77550952 | 2.03782152  | 1.80420602  |
| B | 1.49606815  | -2.08385369 | 1.09502463  |
| B | 0.09531938  | -0.72618293 | 2.61799373  |
| O | 2.36136321  | -1.92831945 | 0.04117235  |
| O | 1.23723055  | -1.01014832 | 1.91072876  |
| O | -0.77987903 | -1.71043971 | 2.99281228  |
| B | 2.17714237  | -1.08546562 | -1.01380552 |
| O | 2.00416444  | 0.26565202  | -0.83195070 |
| B | 1.18505741  | -0.90902522 | -3.14619897 |
| O | 0.82558332  | -3.26962913 | 1.23224831  |
| O | 1.96938338  | -1.61842894 | -2.26528419 |
| B | -0.03804133 | 2.31958054  | -0.30017420 |
| B | 1.32249027  | 1.00163495  | -1.77447223 |
| O | 0.39945904  | 1.80480921  | 0.89933374  |
| O | 0.71018420  | 2.17691464  | -1.43586903 |
| O | 1.08900825  | 0.46050012  | -3.01847097 |
| B | -1.04182943 | -3.75394939 | -1.58882554 |
| O | -0.46914302 | -4.27522761 | -0.46723584 |
| B | -0.61453622 | -2.39909434 | -3.46863732 |
| O | -1.94537610 | -2.04890251 | -3.55482533 |
| O | -0.24201776 | -3.45432734 | -2.66765490 |
| B | -1.79505393 | -2.28675077 | 2.27732544  |
| B | -0.39877588 | -3.64943220 | 0.75212675  |
| O | -3.05245487 | -1.74206991 | 2.35131546  |
| O | -1.56247751 | -3.31701285 | 1.40029083  |
| O | 0.33081771  | -1.55939694 | -3.99819850 |
| B | -3.71457527 | -1.13663696 | 1.32530391  |
| O | -3.93938251 | -1.78315744 | 0.13392010  |
| B | -4.02928969 | 0.93300798  | 0.24399476  |
| O | -3.53296185 | 2.21022203  | 0.20027845  |
| O | -3.99282864 | 0.20794672  | 1.41340678  |
| B | -2.76016745 | -2.37852004 | -2.49525775 |
| B | -4.11384196 | -1.05338786 | -1.02008917 |
| O | -2.35337884 | -3.34335090 | -1.60181415 |
| O | -3.86416865 | -1.61140842 | -2.24343683 |
| O | -4.35386664 | 0.29946453  | -0.93714860 |
