# Supplementary material for: Toward size-dependent thermodynamics of nanoparticles from quantum chemical calculations of small atomic clusters: a case study of (B2O3)n
Source: Royal Society of Chemistry journal article supplement (doi:10.1039/d2cp01672a), 2022-01-01
Supplement: d2cp01672a1.zip [file therm 1..8 _ 9..1000.docx]

!!!

!!!

!!! Supplementary Material

!!!

!!! Toward size-dependent thermodynamics of nanoparticles from quantum

!!! chemical calculations of small atomic clusters: A case study of (B2O3)n

!!!

!!! Physical Chemistry Chemical Physics, 2022

!!!

!!! Boris I. Loukhovitski - biloukhovitski@ciam.ru

!!! Alexey V. Pelevkin - avpelevkin@ciam.ru

!!! Alexander S. Sharipov - assharipov@ciam.ru

!!!

!!! Central Institute of Aviation Motors,

!!! Department of Nonequilibrium Physical-Chemical Processes in Gas Flows

!!!

!!! Thermodynamic properties of (B2O3)n clusters in the NASA (Chemkin) format

!!! were obtained on the basis of DFT calculated electronic energy (Eel),

!!! vibrational frequencies (we), and rotational constants (A0) for n=1..8,

!!! and on the basis of Eel(n), we(n), and A0(n) extrapolations for n=9..1000

!!!

!!!

!

THERMO

100 1550 3000

(B2O3)1 011221B 2O 3 G 100.0 3000.0 800.0 1

9.92842986E+00 7.77807470E-05 2.70763732E-06-1.32176269E-09 1.72424656E-13 2

-1.02233470E+05-2.29230932E+01 2.78068787E+00 2.36148489E-02-1.17580751E-05 3

-2.33171705E-08 2.17490658E-11-1.00740040E+05 1.22005950E+01 4

(B2O3)2 011221B 4O 6 G 100.0 3000.0 800.0 1

1.70021196E+01 7.14676320E-03-6.96735734E-07-6.00268015E-10 1.11004445E-13 2

-2.35182217E+05-5.07077650E+01 5.12169509E+00 4.80365616E-02-3.81038011E-05 3

-1.06181173E-08 2.02239108E-11-2.32670765E+05 7.61683357E+00 4

(B2O3)3 011221B 6O 9 G 100.0 3000.0 800.0 1

2.31324927E+01 2.04241203E-02-9.92808155E-06 2.21875782E-09-2.18147121E-13 2

-3.78269276E+05-7.84758549E+01 6.17221657E+00 8.82080442E-02-1.35161954E-04 3

1.29947074E-07-5.51841685E-11-3.74495790E+05 4.57426062E+00 4

(B2O3)4 011221B 8O 12 G 100.0 3000.0 800.0 1

2.77735939E+01 4.68783199E-02-2.83510703E-05 8.13657740E-09-9.14950258E-13 2

-5.25055883E+05-1.18294295E+02 1.61247387E-01 9.58536317E-02 7.72972361E-05 3

-2.90648745E-07 1.79249274E-10-5.17880376E+05 2.58396916E+01 4

(B2O3)5 011221B 10O 15 G 100.0 3000.0 800.0 1

3.90527583E+01 5.17796498E-02-3.24728372E-05 9.65587536E-09-1.12050477E-12 2

-6.82081306E+05-1.77788766E+02-8.65411024E-02 1.35434760E-01 1.15947901E-05 3

-2.06011871E-07 1.31774554E-10-6.71685410E+05 2.60153657E+01 4

(B2O3)6 011221B 12O 18 G 100.0 3000.0 1100.0 1

6.59809397E+01 1.67608739E-02-5.19062394E-06 8.90722567E-10-1.12135118E-13 2

-8.46089787E+05-3.17955097E+02 2.84423702E+00 1.66086423E-01-9.53372270E-05 3

-2.08629166E-08 2.50979473E-11-8.27144171E+05 1.48997997E+01 4

(B2O3)7 011221B 14O 21 G 100.0 3000.0 800.0 1

5.19832548E+01 7.75557535E-02-5.07601332E-05 1.53183523E-08-1.77605757E-12 2

-9.76668951E+05-2.38844716E+02-6.39682905E-01 2.24746438E-01-1.10383841E-04 3

-1.40689705E-07 1.27388221E-10-9.63985526E+05 2.76451819E+01 4

(B2O3)8 011221B 16O 24 G 100.0 3000.0 900.0 1

7.10198473E+01 6.18209629E-02-3.86386744E-05 1.14716198E-08-1.33695249E-12 2

-1.13610902E+06-3.37750405E+02 5.54606731E+00 1.83976817E-01 5.54357654E-05 3

-3.14370850E-07 1.76795001E-10-1.11710655E+06 9.54930163E+00 4

(B2O3)9 021221B 18O 27 G 100.0 3000.0 800.0 1

6.26234329E+01 1.21394598E-01-7.77034161E-05 2.22869926E-08-2.43153486E-12 2

-1.27619363E+06-3.13008928E+02-4.31611320E+00 2.28992578E-01 1.85114823E-04 3

-6.57037847E-07 3.89345337E-10-1.25804028E+06 4.00958803E+01 4

(B2O3)10 021221B 20O 30 G 100.0 3000.0 800.0 1

6.98956761E+01 1.34752368E-01-8.63319004E-05 2.47764262E-08-2.70470587E-12 2

-1.42698847E+06-3.52841460E+02-5.32024541E+00 2.58683269E-01 1.96660937E-04 3

-7.21371318E-07 4.29383746E-10-1.40668288E+06 4.33420336E+01 4

(B2O3)11 021221B 22O 33 G 100.0 3000.0 800.0 1

7.71609752E+01 1.48055952E-01-9.48837114E-05 2.72291506E-08-2.97243403E-12 2

-1.57808766E+06-3.92659284E+02-6.24977468E+00 2.87458059E-01 2.11432325E-04 3

-7.90354121E-07 4.71757635E-10-1.55563706E+06 4.62882290E+01 4

(B2O3)12 021221B 24O 36 G 100.0 3000.0 800.0 1

8.45556131E+01 1.60977144E-01-1.03061458E-04 2.95497544E-08-3.22426259E-12 2

-1.72946965E+06-4.33096427E+02-7.25965062E+00 3.17409670E-01 2.22757940E-04 3

-8.55573718E-07 5.12713350E-10-1.70485820E+06 4.94737943E+01 4

(B2O3)13 021221B 26O 39 G 100.0 3000.0 800.0 1

9.19194165E+01 1.74244621E-01-1.11662087E-04 3.20293028E-08-3.49574881E-12 2

-1.88109230E+06-4.73482761E+02-8.22898553E+00 3.46928101E-01 2.35574479E-04 3

-9.22347431E-07 5.54148546E-10-1.85431159E+06 5.24854561E+01 4

(B2O3)14 021221B 28O 42 G 100.0 3000.0 800.0 1

9.92382020E+01 1.87316570E-01-1.20062312E-04 3.44457682E-08-3.76039226E-12 2

-2.03289373E+06-5.13579134E+02-9.15153991E+00 3.76156156E-01 2.47756593E-04 3

-9.87146207E-07 5.94308613E-10-2.00396906E+06 5.52999183E+01 4

(B2O3)15 021221B 30O 45 G 100.0 3000.0 800.0 1

1.06513459E+02 2.00685079E-01-1.28693741E-04 3.69282859E-08-4.03177317E-12 2

-2.18485781E+06-5.53462910E+02-1.01151053E+01 4.05722231E-01 2.60937449E-04 3

-1.05554723E-06 6.37038400E-10-2.15380759E+06 5.82456265E+01 4

(B2O3)16 021221B 32O 48 G 100.0 3000.0 800.0 1

1.13911105E+02 2.13690485E-01-1.37004561E-04 3.93037303E-08-4.29083146E-12 2

-2.33702986E+06-5.94042481E+02-1.10107492E+01 4.34449326E-01 2.75857917E-04 3

-1.12485848E-06 6.79629700E-10-2.30380828E+06 6.09387691E+01 4

(B2O3)17 021221B 34O 51 G 100.0 3000.0 800.0 1

1.21396129E+02 2.26610050E-01-1.45341794E-04 4.17010619E-08-4.55286410E-12 2

-2.48936108E+06-6.35057761E+02-1.19584112E+01 4.63963649E-01 2.89015271E-04 3

-1.19281287E-06 7.21897997E-10-2.45395533E+06 6.37902298E+01 4

(B2O3)18 021221B 36O 54 G 100.0 3000.0 800.0 1

1.28726310E+02 2.39799715E-01-1.53838945E-04 4.41426779E-08-4.81986716E-12 2

-2.64177698E+06-6.75248301E+02-1.28906274E+01 4.93425197E-01 3.01706932E-04 3

-1.25966968E-06 7.63537353E-10-2.60423475E+06 6.65684010E+01 4

(B2O3)19 021221B 38O 57 G 100.0 3000.0 800.0 1

1.36076865E+02 2.52851639E-01-1.62193837E-04 4.65341271E-08-5.08067739E-12 2

-2.79431732E+06-7.15523017E+02-1.38657806E+01 5.23624510E-01 3.11142949E-04 3

-1.32163048E-06 8.02753998E-10-2.75463553E+06 6.94771048E+01 4

(B2O3)20 021221B 40O 60 G 100.0 3000.0 800.0 1

1.43650450E+02 2.65587037E-01-1.70362349E-04 4.88749674E-08-5.33657412E-12 2

-2.94704581E+06-7.57085087E+02-1.46475413E+01 5.51023626E-01 3.31419898E-04 3

-1.39872455E-06 8.49104426E-10-2.90514708E+06 7.17181546E+01 4

(B2O3)21 021221B 42O 63 G 100.0 3000.0 800.0 1

1.50975409E+02 2.78700201E-01-1.78835268E-04 5.13165190E-08-5.60378215E-12 2

-3.09978520E+06-7.97221396E+02-1.56144414E+01 5.81161142E-01 3.41362753E-04 3

-1.46192959E-06 8.89113920E-10-3.05576110E+06 7.45765298E+01 4

(B2O3)22 021221B 44O 66 G 100.0 3000.0 800.0 1

1.58307867E+02 2.91940066E-01-1.87367557E-04 5.37653435E-08-5.87115045E-12 2

-3.25263020E+06-8.37458546E+02-1.65182386E+01 6.10445325E-01 3.54603512E-04 3

-1.52940819E-06 9.31006937E-10-3.20646967E+06 7.72097717E+01 4

(B2O3)23 021221B 46O 69 G 100.0 3000.0 800.0 1

1.65658246E+02 3.05002582E-01-1.95723055E-04 5.61514020E-08-6.13062203E-12 2

-3.40555997E+06-8.77766165E+02-1.74241526E+01 6.39375742E-01 3.70062334E-04 3

-1.60132332E-06 9.75579045E-10-3.35726608E+06 7.98673463E+01 4

(B2O3)24 021221B 48O 72 G 100.0 3000.0 800.0 1

1.73237378E+02 3.17582949E-01-2.03751894E-04 5.84440268E-08-6.38077755E-12 2

-3.55862979E+06-9.19253725E+02-1.83429258E+01 6.68851835E-01 3.83229469E-04 3

-1.66953186E-06 1.01808401E-09-3.50814434E+06 8.25397654E+01 4

(B2O3)25 021221B 50O 75 G 100.0 3000.0 800.0 1

1.80508522E+02 3.30987434E-01-2.12454877E-04 6.09550051E-08-6.65539252E-12 2

-3.71169897E+06-9.59160751E+02-1.92981757E+01 6.98906889E-01 3.93971754E-04 3

-1.73411042E-06 1.05885141E-09-3.65909901E+06 8.53272958E+01 4

(B2O3)26 021221B 52O 78 G 100.0 3000.0 800.0 1

1.87926883E+02 3.43797333E-01-2.20606641E-04 6.32791384E-08-6.90857806E-12 2

-3.86487506E+06-9.99811304E+02-2.01610267E+01 7.27956267E-01 4.06749138E-04 3

-1.79996203E-06 1.09961618E-09-3.81012563E+06 8.77796051E+01 4

(B2O3)27 021221B 54O 81 G 100.0 3000.0 800.0 1

1.95524550E+02 3.56584811E-01-2.28891873E-04 6.56727858E-08-7.17146139E-12 2

-4.01818107E+06-1.04148195E+03-2.10730541E+01 7.57424839E-01 4.20055355E-04 3

-1.86801818E-06 1.14187427E-09-3.96121936E+06 9.04081107E+01 4

(B2O3)28 021221B 56O 84 G 100.0 3000.0 800.0 1

2.03015497E+02 3.69351532E-01-2.37054528E-04 6.80017651E-08-7.42489734E-12 2

-4.17150952E+06-1.08254082E+03-2.19378622E+01 7.86286257E-01 4.34922783E-04 3

-1.93825076E-06 1.18530312E-09-4.11237643E+06 9.28696014E+01 4

(B2O3)29 021221B 58O 87 G 100.0 3000.0 800.0 1

2.10339502E+02 3.82532965E-01-2.45566677E-04 7.04560914E-08-7.69396881E-12 2

-4.32485044E+06-1.12273324E+03-2.27907819E+01 8.14899113E-01 4.50927884E-04 3

-2.01035795E-06 1.22975144E-09-4.26359365E+06 9.52922042E+01 4

(B2O3)30 021221B 60O 90 G 100.0 3000.0 800.0 1

2.17645307E+02 3.95794043E-01-2.54141473E-04 7.29229753E-08-7.96357399E-12 2

-4.47825119E+06-1.16284530E+03-2.37149393E+01 8.44716532E-01 4.61596918E-04 3

-2.07393954E-06 1.26973001E-09-4.41486708E+06 9.79420028E+01 4

(B2O3)31 021221B 62O 93 G 100.0 3000.0 800.0 1

2.25285283E+02 4.08315109E-01-2.62166779E-04 7.52274316E-08-8.21623390E-12 2

-4.63179225E+06-1.20470203E+03-2.45668614E+01 8.73638607E-01 4.76074407E-04 3

-2.14312285E-06 1.31237539E-09-4.56619444E+06 1.00336429E+02 4

(B2O3)32 021221B 64O 96 G 100.0 3000.0 800.0 1

2.32643399E+02 4.21378649E-01-2.70531869E-04 7.76132961E-08-8.47544072E-12 2

-4.78528985E+06-1.24501444E+03-2.55052073E+01 9.03624853E-01 4.87272306E-04 3

-2.20882288E-06 1.35385925E-09-4.71757256E+06 1.03029828E+02 4

(B2O3)33 021221B 66O 99 G 100.0 3000.0 800.0 1

2.40188014E+02 4.34017635E-01-2.78668039E-04 7.99549189E-08-8.73182181E-12 2

-4.93889055E+06-1.28631963E+03-2.64073191E+01 9.33188097E-01 4.99744529E-04 3

-2.27604747E-06 1.39592673E-09-4.86899897E+06 1.05592305E+02 4

(B2O3)34 021221B 68O 102 G 100.0 3000.0 800.0 1

2.47585794E+02 4.46973807E-01-2.86963825E-04 8.23271152E-08-8.99041418E-12 2

-5.09250057E+06-1.32686030E+03-2.73470578E+01 9.63339086E-01 5.09493779E-04 3

-2.33885050E-06 1.43571345E-09-5.02047147E+06 1.08277051E+02 4

(B2O3)35 021221B 70O 105 G 100.0 3000.0 800.0 1

2.55249255E+02 4.59479621E-01-2.94977294E-04 8.46199062E-08-9.24059645E-12 2

-5.24623552E+06-1.36886331E+03-2.82631596E+01 9.92391140E-01 5.25741873E-04 3

-2.41275005E-06 1.48142433E-09-5.17198821E+06 1.10921475E+02 4

(B2O3)36 021221B 72O 108 G 100.0 3000.0 800.0 1

2.62453687E+02 4.72953719E-01-3.03708253E-04 8.71353266E-08-9.51565845E-12 2

-5.39988103E+06-1.40840606E+03-2.92154055E+01 1.02280537E+00 5.34291591E-04 3

-2.47365013E-06 1.52024515E-09-5.32354689E+06 1.13640516E+02 4

(B2O3)37 021221B 74O 111 G 100.0 3000.0 800.0 1

2.69734296E+02 4.86267162E-01-3.12359297E-04 8.96418794E-08-9.79130079E-12 2

-5.55360507E+06-1.44842781E+03-3.00090764E+01 1.05112007E+00 5.49423725E-04 3

-2.54250298E-06 1.56242080E-09-5.47514579E+06 1.15812232E+02 4

(B2O3)38 021221B 76O 114 G 100.0 3000.0 800.0 1

2.77483450E+02 4.98512872E-01-3.20136700E-04 9.18499239E-08-1.00312039E-11 2

-5.70746984E+06-1.49082492E+03-3.09266240E+01 1.08078884E+00 5.62547532E-04 3

-2.61125771E-06 1.60535577E-09-5.62678265E+06 1.18411700E+02 4

(B2O3)39 021221B 78O 117 G 100.0 3000.0 800.0 1

2.84972449E+02 5.11365834E-01-3.28402722E-04 9.42238699E-08-1.02906985E-11 2

-5.86130996E+06-1.53186695E+03-3.18323352E+01 1.11057789E+00 5.73816730E-04 3

-2.67619283E-06 1.64612540E-09-5.77845699E+06 1.20970934E+02 4

(B2O3)40 021221B 80O 120 G 100.0 3000.0 800.0 1

2.92421223E+02 5.24361407E-01-3.36853059E-04 9.66704245E-08-1.05596591E-11 2

-6.01517281E+06-1.57271172E+03-3.27377025E+01 1.14032728E+00 5.85513006E-04 3

-2.74204298E-06 1.68742180E-09-5.93016655E+06 1.23520062E+02 4

(B2O3)41 021221B 82O 123 G 100.0 3000.0 800.0 1

2.99774408E+02 5.37279595E-01-3.45047549E-04 9.89885452E-08-1.08096730E-11 2

-6.16903111E+06-1.61299881E+03-3.36044915E+01 1.16943677E+00 5.99075617E-04 3

-2.81043035E-06 1.73000284E-09-6.08191003E+06 1.25946162E+02 4

(B2O3)42 021221B 84O 126 G 100.0 3000.0 800.0 1

3.07293357E+02 5.50018058E-01-3.53205812E-04 1.01322004E-07-1.10644798E-11 2

-6.32297704E+06-1.65419911E+03-3.44765688E+01 1.19873259E+00 6.12360274E-04 3

-2.87851922E-06 1.77241870E-09-6.23368630E+06 1.28378260E+02 4

(B2O3)43 021221B 86O 129 G 100.0 3000.0 800.0 1

3.14800343E+02 5.62900597E-01-3.61548648E-04 1.03733520E-07-1.13294182E-11 2

-6.47695834E+06-1.69538877E+03-3.53563551E+01 1.22762552E+00 6.28546199E-04 3

-2.95201605E-06 1.81791823E-09-6.38549396E+06 1.30862150E+02 4

(B2O3)44 021221B 88O 132 G 100.0 3000.0 800.0 1

3.22194697E+02 5.75764861E-01-3.69804544E-04 1.06103099E-07-1.15884958E-11 2

-6.63093173E+06-1.73592034E+03-3.62116486E+01 1.25690243E+00 6.40250397E-04 3

-3.01652520E-06 1.85815470E-09-6.53733173E+06 1.33226141E+02 4

(B2O3)45 021221B 90O 135 G 100.0 3000.0 800.0 1

3.29719172E+02 5.88564950E-01-3.78002842E-04 1.08444593E-07-1.18435028E-11 2

-6.78496542E+06-1.77713810E+03-3.71204876E+01 1.28663370E+00 6.52851127E-04 3

-3.08448850E-06 1.90080264E-09-6.68919894E+06 1.35786605E+02 4

(B2O3)46 021221B 92O 138 G 100.0 3000.0 800.0 1

3.37215989E+02 6.01407400E-01-3.86298822E-04 1.10831665E-07-1.21046300E-11 2

-6.93902482E+06-1.81822382E+03-3.80512437E+01 1.31680386E+00 6.62816319E-04 3

-3.14773419E-06 1.94078134E-09-6.84109408E+06 1.38410954E+02 4

(B2O3)47 021221B 94O 141 G 100.0 3000.0 800.0 1

3.44600840E+02 6.14431264E-01-3.94672268E-04 1.13233329E-07-1.23667717E-11 2

-7.09307779E+06-1.85872190E+03-3.88978157E+01 1.34590485E+00 6.76164093E-04 3

-3.21524611E-06 1.98266739E-09-6.99301674E+06 1.40740204E+02 4

(B2O3)48 021221B 96O 144 G 100.0 3000.0 800.0 1

3.51995405E+02 6.27362567E-01-4.03016102E-04 1.15637252E-07-1.26303247E-11 2

-7.24715229E+06-1.89921419E+03-3.98466456E+01 1.37639354E+00 6.84782173E-04 3

-3.27701504E-06 2.02219475E-09-7.14496617E+06 1.43424120E+02 4

(B2O3)49 021221B 98O 147 G 100.0 3000.0 800.0 1

3.59514100E+02 6.40007664E-01-4.11023028E-04 1.17906078E-07-1.28760658E-11 2

-7.40128132E+06-1.94035014E+03-4.07842627E+01 1.40665926E+00 6.94835487E-04 3

-3.34108367E-06 2.06288172E-09-7.29694064E+06 1.46069644E+02 4

(B2O3)50 021221B 100O 150 G 100.0 3000.0 800.0 1

3.67130625E+02 6.52699341E-01-4.19250581E-04 1.20281202E-07-1.31367173E-11 2

-7.55547390E+06-1.98207768E+03-4.16766891E+01 1.43617610E+00 7.08542075E-04 3

-3.41076647E-06 2.10633353E-09-7.44893955E+06 1.48563806E+02 4

(B2O3)51 021221B 102O 153 G 100.0 3000.0 800.0 1

3.74519751E+02 6.65727770E-01-4.27635120E-04 1.22686012E-07-1.33991520E-11 2

-7.70963357E+06-2.02259990E+03-4.25960375E+01 1.46643403E+00 7.17018035E-04 3

-3.47076010E-06 2.14435762E-09-7.60096295E+06 1.51130346E+02 4

(B2O3)52 021221B 104O 156 G 100.0 3000.0 800.0 1

3.82171984E+02 6.78200176E-01-4.35653190E-04 1.24991234E-07-1.36520335E-11 2

-7.86389224E+06-2.06454028E+03-4.33843285E+01 1.49461227E+00 7.34341537E-04 3

-3.54442333E-06 2.18940040E-09-7.75300936E+06 1.53264640E+02 4

(B2O3)53 021221B 106O 159 G 100.0 3000.0 800.0 1

3.89394555E+02 6.91576139E-01-4.44312794E-04 1.27484838E-07-1.39244501E-11 2

-8.01805778E+06-2.10423989E+03-4.43183971E+01 1.52414672E+00 7.47002803E-04 3

-3.61198302E-06 2.23173485E-09-7.90507788E+06 1.55932350E+02 4

(B2O3)54 021221B 108O 162 G 100.0 3000.0 800.0 1

3.97057782E+02 7.04063492E-01-4.52326454E-04 1.29783185E-07-1.41758482E-11 2

-8.17235351E+06-2.14619766E+03-4.51928846E+01 1.55360465E+00 7.60058227E-04 3

-3.67986356E-06 2.27398499E-09-8.05716888E+06 1.58352354E+02 4

(B2O3)55 021221B 110O 165 G 100.0 3000.0 800.0 1

4.04442628E+02 7.17114943E-01-4.60753840E-04 1.32205462E-07-1.44403966E-11 2

-8.32658570E+06-2.18665500E+03-4.61394714E+01 1.58402602E+00 7.69606608E-04 3

-3.74339265E-06 2.31448730E-09-8.20928044E+06 1.61020403E+02 4

(B2O3)56 021221B 112O 168 G 100.0 3000.0 800.0 1

4.11915644E+02 7.29750856E-01-4.68752423E-04 1.34473455E-07-1.46864063E-11 2

-8.48085447E+06-2.22752319E+03-4.70922277E+01 1.61461943E+00 7.77880606E-04 3

-3.80474587E-06 2.35383940E-09-8.36141247E+06 1.63705175E+02 4

(B2O3)57 021221B 114O 171 G 100.0 3000.0 800.0 1

4.19367883E+02 7.42635191E-01-4.77077955E-04 1.36871410E-07-1.49489302E-11 2

-8.63515399E+06-2.26836638E+03-4.79610470E+01 1.64415929E+00 7.89603560E-04 3

-3.87012361E-06 2.39475549E-09-8.51356497E+06 1.66095455E+02 4

(B2O3)58 021221B 116O 174 G 100.0 3000.0 800.0 1

4.26964859E+02 7.55198687E-01-4.85118922E-04 1.39172589E-07-1.52002656E-11 2

-8.78951112E+06-2.30996067E+03-4.88587721E+01 1.67405131E+00 8.00478979E-04 3

-3.93457701E-06 2.43528477E-09-8.66573679E+06 1.68585728E+02 4

(B2O3)59 021221B 118O 177 G 100.0 3000.0 800.0 1

4.34557379E+02 7.67815358E-01-4.93207116E-04 1.41484011E-07-1.54520797E-11 2

-8.94387882E+06-2.35151803E+03-4.97752160E+01 1.70396570E+00 8.12601113E-04 3

-4.00219643E-06 2.47785709E-09-8.81792743E+06 1.71151675E+02 4

(B2O3)60 021221B 120O 180 G 100.0 3000.0 800.0 1

4.41796127E+02 7.81186888E-01-5.01887910E-04 1.43995238E-07-1.57277916E-11 2

-9.09817909E+06-2.39125039E+03-5.06468315E+01 1.73357631E+00 8.23705728E-04 3

-4.06654183E-06 2.51832121E-09-8.97013643E+06 1.73549792E+02 4

(B2O3)61 021221B 122O 183 G 100.0 3000.0 800.0 1

4.49275476E+02 7.94060928E-01-5.10197068E-04 1.46382712E-07-1.59884779E-11 2

-9.25256639E+06-2.43227838E+03-5.14968366E+01 1.76240138E+00 8.39170983E-04 3

-4.13813527E-06 2.56257013E-09-9.12236340E+06 1.75899959E+02 4

(B2O3)62 021221B 124O 186 G 100.0 3000.0 800.0 1

4.56817568E+02 8.06828851E-01-5.18468639E-04 1.48774015E-07-1.62516271E-11 2

-9.40699517E+06-2.47363731E+03-5.23739561E+01 1.79210955E+00 8.49987834E-04 3

-4.20173521E-06 2.60243867E-09-9.27460802E+06 1.78312712E+02 4

(B2O3)63 021221B 126O 189 G 100.0 3000.0 800.0 1

4.64281692E+02 8.19414375E-01-5.26373773E-04 1.50992172E-07-1.64896650E-11 2

-9.56137217E+06-2.51440149E+03-5.33190085E+01 1.82257162E+00 8.59543147E-04 3

-4.26583060E-06 2.64342570E-09-9.42686931E+06 1.80968098E+02 4

(B2O3)64 021221B 128O 192 G 100.0 3000.0 800.0 1

4.71818082E+02 8.32149964E-01-5.34595879E-04 1.53362508E-07-1.67496892E-11 2

-9.71582835E+06-2.55572038E+03-5.42505281E+01 1.85240374E+00 8.71510034E-04 3

-4.33275168E-06 2.68551660E-09-9.57914771E+06 1.83605190E+02 4

(B2O3)65 021221B 130O 195 G 100.0 3000.0 800.0 1

4.79227911E+02 8.45268979E-01-5.43121066E-04 1.55828122E-07-1.70204166E-11 2

-9.87027398E+06-2.59641597E+03-5.50919756E+01 1.88141933E+00 8.85293943E-04 3

-4.40085757E-06 2.72769901E-09-9.73144232E+06 1.85907014E+02 4

(B2O3)66 021221B 132O 198 G 100.0 3000.0 800.0 1

4.86953295E+02 8.57475057E-01-5.50875164E-04 1.58034796E-07-1.72607181E-11 2

-1.00247865E+07-2.63862824E+03-5.59994145E+01 1.91129052E+00 8.97679886E-04 3

-4.46916431E-06 2.77070571E-09-9.88375228E+06 1.88430711E+02 4

(B2O3)67 021221B 134O 201 G 100.0 3000.0 800.0 1

4.94256368E+02 8.70712629E-01-5.59423350E-04 1.60487417E-07-1.75279762E-11 2

-1.01792120E+07-2.67866000E+03-5.69402876E+01 1.94187033E+00 9.05878467E-04 3

-4.53001770E-06 2.80965941E-09-1.00360782E+07 1.91061774E+02 4

(B2O3)68 021221B 136O 204 G 100.0 3000.0 800.0 1

5.01628007E+02 8.83808685E-01-5.67955942E-04 1.62966600E-07-1.78014058E-11 2

-1.03336919E+07-2.71914417E+03-5.77400589E+01 1.97056127E+00 9.19657063E-04 3

-4.59722722E-06 2.85112661E-09-1.01884185E+07 1.93204121E+02 4

(B2O3)69 021221B 138O 207 G 100.0 3000.0 800.0 1

5.09155424E+02 8.96423442E-01-5.75989806E-04 1.65249264E-07-1.80488217E-11 2

-1.04881964E+07-2.76030940E+03-5.86581399E+01 2.00075095E+00 9.29914223E-04 3

-4.66165812E-06 2.89198428E-09-1.03407746E+07 1.95757315E+02 4

(B2O3)70 021221B 140O 210 G 100.0 3000.0 800.0 1

5.16742494E+02 9.09093654E-01-5.84117282E-04 1.67581307E-07-1.83042488E-11 2

-1.06427496E+07-2.80185687E+03-5.95880254E+01 2.03109246E+00 9.39644511E-04 3

-4.72498327E-06 2.93217669E-09-1.04931443E+07 1.98354502E+02 4

(B2O3)71 021221B 142O 213 G 100.0 3000.0 800.0 1

5.24259456E+02 9.21692479E-01-5.92134801E-04 1.69859930E-07-1.85512929E-11 2

-1.07972777E+07-2.84296859E+03-6.04820181E+01 2.06102525E+00 9.50386750E-04 3

-4.78958682E-06 2.97289939E-09-1.06455284E+07 2.00815709E+02 4

(B2O3)72 021221B 144O 216 G 100.0 3000.0 800.0 1

5.31656074E+02 9.34844579E-01-6.00727075E-04 1.72353667E-07-1.88255683E-11 2

-1.09518078E+07-2.88352728E+03-6.14181549E+01 2.09144247E+00 9.59789841E-04 3

-4.85265789E-06 3.01308608E-09-1.07979261E+07 2.03434159E+02 4

(B2O3)73 021221B 146O 219 G 100.0 3000.0 800.0 1

5.39220055E+02 9.47455483E-01-6.08775431E-04 1.74648354E-07-1.90752078E-11 2

-1.11063854E+07-2.92492502E+03-6.22817789E+01 2.12094210E+00 9.72397046E-04 3

-4.91999535E-06 3.05519172E-09-1.09503368E+07 2.05797639E+02 4

(B2O3)74 021221B 148O 222 G 100.0 3000.0 800.0 1

5.46845739E+02 9.59826020E-01-6.16687729E-04 1.76915004E-07-1.93231201E-11 2

-1.12609915E+07-2.96661687E+03-6.32206366E+01 2.15144861E+00 9.81099730E-04 3

-4.98201087E-06 3.09482331E-09-1.11027613E+07 2.08418012E+02 4

(B2O3)75 021221B 150O 225 G 100.0 3000.0 800.0 1

5.54248376E+02 9.72897889E-01-6.25125818E-04 1.79337669E-07-1.95875104E-11 2

-1.14155680E+07-3.00723920E+03-6.40466116E+01 2.18050451E+00 9.94330456E-04 3

-5.04899575E-06 3.13633139E-09-1.12551983E+07 2.10647563E+02 4

(B2O3)76 021221B 152O 228 G 100.0 3000.0 800.0 1

5.61588831E+02 9.86190789E-01-6.33849507E-04 1.81881088E-07-1.98682977E-11 2

-1.15701404E+07-3.04754326E+03-6.48903291E+01 2.20956897E+00 1.00857764E-03 3

-5.11873499E-06 3.17968902E-09-1.14076488E+07 2.12951257E+02 4

(B2O3)77 021221B 154O 231 G 100.0 3000.0 800.0 1

5.69199592E+02 9.98502187E-01-6.41552610E-04 1.84041867E-07-2.01007109E-11 2

-1.17247653E+07-3.08910195E+03-6.58324269E+01 2.24005888E+00 1.01799767E-03 3

-5.18238456E-06 3.22034074E-09-1.15601112E+07 2.15587990E+02 4

(B2O3)78 021221B 156O 234 G 100.0 3000.0 800.0 1

5.76543406E+02 1.01157975E+00-6.49990435E-04 1.86469094E-07-2.03663862E-11 2

-1.18793550E+07-3.12937361E+03-6.66987527E+01 2.26979314E+00 1.02820192E-03 3

-5.24499721E-06 3.25975835E-09-1.17125851E+07 2.17943681E+02 4

(B2O3)79 021221B 158O 237 G 100.0 3000.0 800.0 1

5.84102719E+02 1.02432872E+00-6.58237330E-04 1.88845487E-07-2.06266461E-11 2

-1.20340188E+07-3.17081237E+03-6.75689815E+01 2.29893702E+00 1.04313566E-03 3

-5.31648651E-06 3.30416910E-09-1.18650715E+07 2.20351506E+02 4

(B2O3)80 021221B 160O 240 G 100.0 3000.0 800.0 1

5.91752915E+02 1.03670213E+00-6.66143393E-04 1.91107246E-07-2.08738629E-11 2

-1.21887040E+07-3.21262700E+03-6.85024789E+01 2.32943237E+00 1.05226897E-03 3

-5.37945606E-06 3.34439886E-09-1.20175699E+07 2.22953348E+02 4

(B2O3)81 021221B 162O 243 G 100.0 3000.0 800.0 1

5.99215386E+02 1.04956693E+00-6.74419664E-04 1.93480450E-07-2.11326097E-11 2

-1.23433494E+07-3.25348200E+03-6.94277403E+01 2.35979066E+00 1.06181790E-03 3

-5.44270197E-06 3.38462300E-09-1.21700789E+07 2.25521767E+02 4

(B2O3)82 021221B 164O 246 G 100.0 3000.0 800.0 1

6.06645981E+02 1.06243745E+00-6.82700522E-04 1.95857743E-07-2.13926815E-11 2

-1.24980078E+07-3.29419191E+03-7.03028765E+01 2.38965606E+00 1.07177907E-03 3

-5.50523135E-06 3.42407765E-09-1.23226006E+07 2.27909719E+02 4

(B2O3)83 021221B 166O 249 G 100.0 3000.0 800.0 1

6.14096598E+02 1.07546213E+00-6.91187699E-04 1.98316141E-07-2.16626891E-11 2

-1.26526987E+07-3.33511270E+03-7.12250735E+01 2.41931932E+00 1.08419431E-03 3

-5.57223925E-06 3.46592469E-09-1.24751319E+07 2.30501096E+02 4

(B2O3)84 021221B 168O 252 G 100.0 3000.0 800.0 1

6.21662942E+02 1.08808830E+00-6.99254890E-04 2.00620444E-07-2.19141092E-11 2

-1.28074083E+07-3.37652113E+03-7.21516660E+01 2.44964057E+00 1.09418775E-03 3

-5.63646296E-06 3.50678756E-09-1.26276739E+07 2.33073195E+02 4

(B2O3)85 021221B 170O 255 G 100.0 3000.0 800.0 1

6.28953040E+02 1.10115964E+00-7.07586653E-04 2.02985183E-07-2.21694971E-11 2

-1.29620400E+07-3.41641532E+03-7.30662872E+01 2.48007386E+00 1.10239108E-03 3

-5.69707133E-06 3.54553348E-09-1.27802272E+07 2.35597248E+02 4

(B2O3)86 021221B 172O 258 G 100.0 3000.0 800.0 1

6.36645791E+02 1.11357914E+00-7.15596340E-04 2.05290544E-07-2.24223230E-11 2

-1.31168118E+07-3.45850544E+03-7.40000076E+01 2.51054735E+00 1.11170085E-03 3

-5.76001789E-06 3.58558293E-09-1.29327903E+07 2.38195703E+02 4

(B2O3)87 021221B 174O 261 G 100.0 3000.0 800.0 1

6.44179602E+02 1.12628731E+00-7.23771228E-04 2.07643541E-07-2.26805183E-11 2

-1.32715525E+07-3.49977814E+03-7.48573576E+01 2.54011864E+00 1.12314040E-03 3

-5.82474039E-06 3.62607198E-09-1.30853638E+07 2.40522565E+02 4

(B2O3)88 021221B 176O 264 G 100.0 3000.0 800.0 1

6.51698722E+02 1.13902431E+00-7.31971888E-04 2.09998212E-07-2.29379376E-11 2

-1.34262980E+07-3.54097426E+03-7.56770014E+01 2.56890387E+00 1.13838038E-03 3

-5.89591128E-06 3.67010961E-09-1.32379481E+07 2.42740809E+02 4

(B2O3)89 021221B 178O 267 G 100.0 3000.0 800.0 1

6.59157970E+02 1.15188518E+00-7.40237990E-04 2.12362904E-07-2.31952488E-11 2

-1.35810232E+07-3.58179971E+03-7.66141311E+01 2.59950932E+00 1.14701707E-03 3

-5.95797831E-06 3.70982295E-09-1.33905409E+07 2.45340680E+02 4

(B2O3)90 021221B 180O 270 G 100.0 3000.0 800.0 1

6.66548091E+02 1.16506565E+00-7.48875652E-04 2.14875891E-07-2.34720165E-11 2

-1.37357615E+07-3.62235567E+03-7.74685676E+01 2.62894599E+00 1.15944772E-03 3

-6.02467570E-06 3.75151784E-09-1.35431447E+07 2.47663575E+02 4

(B2O3)91 021221B 182O 273 G 100.0 3000.0 800.0 1

6.74241930E+02 1.17730338E+00-7.56602048E-04 2.17063768E-07-2.37094441E-11 2

-1.38905632E+07-3.66437985E+03-7.83896949E+01 2.65922627E+00 1.16982472E-03 3

-6.08966073E-06 3.79275327E-09-1.36957572E+07 2.50217325E+02 4

(B2O3)92 021221B 184O 276 G 100.0 3000.0 800.0 1

6.81764566E+02 1.18980071E+00-7.64537975E-04 2.19320585E-07-2.39547916E-11 2

-1.40453461E+07-3.70554929E+03-7.93252441E+01 2.68944986E+00 1.17904106E-03 3

-6.15192498E-06 3.83238708E-09-1.38483798E+07 2.52845804E+02 4

(B2O3)93 021221B 186O 279 G 100.0 3000.0 800.0 1

6.89102333E+02 1.20301716E+00-7.73088873E-04 2.21778874E-07-2.42231784E-11 2

-1.42000804E+07-3.74578231E+03-8.01968385E+01 2.71908552E+00 1.19133301E-03 3

-6.21906447E-06 3.87452261E-09-1.40010101E+07 2.55219959E+02 4

(B2O3)94 021221B 188O 282 G 100.0 3000.0 800.0 1

6.96536490E+02 1.21594269E+00-7.81471915E-04 2.24201645E-07-2.44890652E-11 2

-1.43548548E+07-3.78648692E+03-8.11300503E+01 2.74978229E+00 1.19878124E-03 3

-6.27871350E-06 3.91282878E-09-1.41536510E+07 2.57808770E+02 4

(B2O3)95 021221B 190O 285 G 100.0 3000.0 800.0 1

7.04118826E+02 1.22866641E+00-7.89660724E-04 2.26552150E-07-2.47459916E-11 2

-1.45096824E+07-3.82802187E+03-8.20053041E+01 2.77947303E+00 1.21097511E-03 3

-6.34545321E-06 3.95459639E-09-1.43062999E+07 2.60201530E+02 4

(B2O3)96 021221B 192O 288 G 100.0 3000.0 800.0 1

7.11640554E+02 1.24125179E+00-7.97693972E-04 2.28841659E-07-2.49951390E-11 2

-1.46644862E+07-3.86914532E+03-8.29511045E+01 2.81030879E+00 1.21810221E-03 3

-6.40498372E-06 3.99296165E-09-1.44589574E+07 2.62825112E+02 4

(B2O3)97 021221B 194O 291 G 100.0 3000.0 800.0 1

7.19110610E+02 1.25407930E+00-8.05990666E-04 2.31234632E-07-2.52573931E-11 2

-1.48193104E+07-3.91012820E+03-8.37196543E+01 2.83826055E+00 1.23592994E-03 3

-6.47933958E-06 4.03839025E-09-1.46116244E+07 2.64874614E+02 4

(B2O3)98 021221B 196O 294 G 100.0 3000.0 800.0 1

7.26717998E+02 1.26668230E+00-8.14103700E-04 2.33571399E-07-2.55140443E-11 2

-1.49741714E+07-3.95177582E+03-8.46230536E+01 2.86842290E+00 1.24600115E-03 3

-6.54301276E-06 4.07871585E-09-1.47642994E+07 2.67361956E+02 4

(B2O3)99 021221B 198O 297 G 100.0 3000.0 800.0 1

7.34156351E+02 1.27943295E+00-8.22246828E-04 2.35892034E-07-2.57659631E-11 2

-1.51289869E+07-3.99252691E+03-8.55464216E+01 2.89809319E+00 1.25848273E-03 3

-6.61090595E-06 4.12137328E-09-1.49169820E+07 2.69959340E+02 4

(B2O3)100 021221B 200O 300 G 100.0 3000.0 800.0 1

7.41737030E+02 1.29211932E+00-8.30397334E-04 2.38224986E-07-2.60203894E-11 2

-1.52838500E+07-4.03402031E+03-8.64645115E+01 2.92830195E+00 1.26927430E-03 3

-6.67645526E-06 4.16290020E-09-1.50696730E+07 2.72504353E+02 4

(B2O3)101 021221B 202O 303 G 100.0 3000.0 800.0 1

7.48948254E+02 1.30552778E+00-8.39088778E-04 2.40729130E-07-2.62943697E-11 2

-1.54386232E+07-4.07356101E+03-8.73892012E+01 2.95906496E+00 1.27556034E-03 3

-6.73354956E-06 4.19968944E-09-1.52223732E+07 2.75048846E+02 4

(B2O3)102 021221B 204O 306 G 100.0 3000.0 800.0 1

7.56520333E+02 1.31803755E+00-8.47092337E-04 2.43022456E-07-2.65450168E-11 2

-1.55934929E+07-4.11497156E+03-8.82779552E+01 2.98900006E+00 1.28641620E-03 3

-6.79863506E-06 4.24081695E-09-1.53750811E+07 2.77482589E+02 4

(B2O3)103 021221B 206O 309 G 100.0 3000.0 800.0 1

7.64100245E+02 1.33085247E+00-8.55389095E-04 2.45410141E-07-2.68060752E-11 2

-1.57483896E+07-4.15651260E+03-8.91646080E+01 3.01892327E+00 1.29765536E-03 3

-6.86374300E-06 4.28165626E-09-1.55277954E+07 2.79909710E+02 4

(B2O3)104 021221B 208O 312 G 100.0 3000.0 800.0 1

7.71765682E+02 1.34318783E+00-8.63315152E-04 2.47686901E-07-2.70554499E-11 2

-1.59032966E+07-4.19839041E+03-9.01066557E+01 3.04959354E+00 1.30637708E-03 3

-6.92647150E-06 4.32185528E-09-1.56805191E+07 2.82526679E+02 4

(B2O3)105 021221B 210O 315 G 100.0 3000.0 800.0 1

7.79275104E+02 1.35594172E+00-8.71510954E-04 2.50035050E-07-2.73116366E-11 2

-1.60581818E+07-4.23952313E+03-9.09271190E+01 3.07867662E+00 1.31994364E-03 3

-6.99465214E-06 4.36420009E-09-1.58332496E+07 2.84723278E+02 4

(B2O3)106 021221B 212O 318 G 100.0 3000.0 800.0 1

7.86656632E+02 1.36891010E+00-8.79852559E-04 2.52429098E-07-2.75732721E-11 2

-1.62130336E+07-4.27993401E+03-9.18736396E+01 3.10951591E+00 1.32688860E-03 3

-7.05376144E-06 4.40236042E-09-1.59859866E+07 2.87355913E+02 4

(B2O3)107 021221B 214O 321 G 100.0 3000.0 800.0 1

7.94221288E+02 1.38140579E+00-8.87768478E-04 2.54665633E-07-2.78144764E-11 2

-1.63679290E+07-4.32128106E+03-9.27337903E+01 3.13904045E+00 1.33970437E-03 3

-7.12197124E-06 4.44509278E-09-1.61387322E+07 2.89690548E+02 4

(B2O3)108 021221B 216O 324 G 100.0 3000.0 800.0 1

8.01623593E+02 1.39453238E+00-8.96336078E-04 2.57157368E-07-2.80895258E-11 2

-1.65228172E+07-4.36187451E+03-9.36329634E+01 3.16946009E+00 1.34758836E-03 3

-7.18128824E-06 4.48286482E-09-1.62914850E+07 2.92142966E+02 4

(B2O3)109 021221B 218O 327 G 100.0 3000.0 800.0 1

8.09175609E+02 1.40717904E+00-9.04438563E-04 2.59476141E-07-2.83427110E-11 2

-1.66777369E+07-4.40318208E+03-9.45792146E+01 3.20021431E+00 1.35569868E-03 3

-7.24267404E-06 4.52229125E-09-1.64442446E+07 2.94777931E+02 4

(B2O3)110 021221B 220O 330 G 100.0 3000.0 800.0 1

8.16730888E+02 1.41976682E+00-9.12523375E-04 2.61792831E-07-2.85953632E-11 2

-1.68326640E+07-4.44452469E+03-9.54244581E+01 3.22945150E+00 1.36942471E-03 3

-7.31208104E-06 4.56560445E-09-1.65970121E+07 2.97070240E+02 4

(B2O3)111 021221B 222O 333 G 100.0 3000.0 800.0 1

8.24096334E+02 1.43287917E+00-9.20997704E-04 2.64229668E-07-2.88617818E-11 2

-1.69875532E+07-4.48488640E+03-9.63461934E+01 3.26003156E+00 1.37727114E-03 3

-7.37212441E-06 4.60405288E-09-1.67497858E+07 2.99607207E+02 4

(B2O3)112 021221B 224O 336 G 100.0 3000.0 800.0 1

8.31603912E+02 1.44544403E+00-9.29006583E-04 2.66513621E-07-2.91103081E-11 2

-1.71424787E+07-4.52597022E+03-9.71416863E+01 3.28877757E+00 1.39153906E-03 3

-7.44109385E-06 4.64673094E-09-1.69025657E+07 3.01717589E+02 4

(B2O3)113 021221B 226O 339 G 100.0 3000.0 800.0 1

8.39154126E+02 1.45821093E+00-9.37247172E-04 2.68886418E-07-2.93706332E-11 2

-1.72974278E+07-4.56728603E+03-9.80494332E+01 3.31905495E+00 1.40178995E-03 3

-7.50572224E-06 4.68777833E-09-1.70553538E+07 3.04219273E+02 4

(B2O3)114 021221B 228O 342 G 100.0 3000.0 800.0 1

8.46693077E+02 1.47093218E+00-9.45468306E-04 2.71253775E-07-2.96296758E-11 2

-1.74523854E+07-4.60858503E+03-9.89529470E+01 3.34883683E+00 1.41412877E-03 3

-7.57366832E-06 4.73057611E-09-1.72081475E+07 3.06718326E+02 4

(B2O3)115 021221B 230O 345 G 100.0 3000.0 800.0 1

8.54206795E+02 1.48350999E+00-9.53464162E-04 2.73520259E-07-2.98748053E-11 2

-1.76073268E+07-4.64965761E+03-9.98522609E+01 3.37908653E+00 1.42315747E-03 3

-7.63546561E-06 4.76983404E-09-1.73609478E+07 3.09186659E+02 4

(B2O3)116 021221B 232O 348 G 100.0 3000.0 800.0 1

8.61805341E+02 1.49623376E+00-9.61734582E-04 2.75917093E-07-3.01387553E-11 2

-1.77623163E+07-4.69126299E+03-1.00764530E+02 3.40941609E+00 1.43311849E-03 3

-7.69945088E-06 4.81045315E-09-1.75137556E+07 3.11696866E+02 4

(B2O3)117 021221B 234O 351 G 100.0 3000.0 800.0 1

8.69319410E+02 1.50891349E+00-9.69828928E-04 2.78224197E-07-3.03896285E-11 2

-1.79172793E+07-4.73237981E+03-1.01638837E+02 3.43938912E+00 1.44316167E-03 3

-7.76252388E-06 4.85029096E-09-1.76665696E+07 3.14067554E+02 4

(B2O3)118 021221B 236O 354 G 100.0 3000.0 800.0 1

8.76585227E+02 1.52225933E+00-9.78528602E-04 2.80745855E-07-3.06668765E-11 2

-1.80721836E+07-4.77220718E+03-1.02549749E+02 3.46983017E+00 1.45163707E-03 3

-7.82377687E-06 4.88946963E-09-1.78193895E+07 3.16570172E+02 4

(B2O3)119 021221B 238O 357 G 100.0 3000.0 800.0 1

8.84047057E+02 1.53501950E+00-9.86667313E-04 2.83062599E-07-3.09183801E-11 2

-1.82271481E+07-4.81306403E+03-1.03417248E+02 3.49964897E+00 1.46195734E-03 3

-7.88706713E-06 4.92940234E-09-1.79722150E+07 3.18919941E+02 4

(B2O3)120 021221B 240O 360 G 100.0 3000.0 800.0 1

8.91843428E+02 1.54706584E+00-9.94343592E-04 2.85258354E-07-3.11585696E-11 2

-1.83822025E+07-4.85566066E+03-1.04329778E+02 3.52923834E+00 1.47628935E-03 3

-7.95904581E-06 4.97449049E-09-1.81250473E+07 3.21479341E+02 4

(B2O3)121 021221B 242O 363 G 100.0 3000.0 800.0 1

8.99254062E+02 1.56011061E+00-1.00280711E-03 2.87701606E-07-3.14264792E-11 2

-1.85371851E+07-4.89633242E+03-1.05154392E+02 3.55846724E+00 1.48822136E-03 3

-8.02370608E-06 5.01472993E-09-1.82778847E+07 3.23687522E+02 4

(B2O3)122 021221B 244O 366 G 100.0 3000.0 800.0 1

9.06774077E+02 1.57288021E+00-1.01103866E-03 2.90058436E-07-3.16828541E-11 2

-1.86921802E+07-4.93749284E+03-1.06020595E+02 3.58815881E+00 1.50027253E-03 3

-8.09051246E-06 5.05665928E-09-1.84307299E+07 3.26041711E+02 4

(B2O3)123 021221B 246O 369 G 100.0 3000.0 800.0 1

9.14306082E+02 1.58551246E+00-1.01909071E-03 2.92352046E-07-3.19323880E-11 2

-1.88471743E+07-4.97866718E+03-1.06966078E+02 3.61897410E+00 1.50830277E-03 3

-8.15206588E-06 5.09627317E-09-1.85835798E+07 3.28657856E+02 4

(B2O3)124 021221B 248O 372 G 100.0 3000.0 800.0 1

9.21764155E+02 1.59830540E+00-1.02733546E-03 2.94732039E-07-3.21941215E-11 2

-1.90021704E+07-5.01948924E+03-1.07910389E+02 3.65001490E+00 1.51365670E-03 3

-8.20802373E-06 5.13255908E-09-1.87364356E+07 3.31266458E+02 4

(B2O3)125 021221B 250O 375 G 100.0 3000.0 800.0 1

9.29378022E+02 1.61098096E+00-1.03553742E-03 2.97089762E-07-3.24516300E-11 2

-1.91572069E+07-5.06115586E+03-1.08778170E+02 3.67963232E+00 1.52692246E-03 3

-8.27719932E-06 5.17579249E-09-1.88892972E+07 3.33628094E+02 4

(B2O3)126 021221B 252O 378 G 100.0 3000.0 800.0 1

9.36775194E+02 1.62381948E+00-1.04376242E-03 2.99445482E-07-3.27088784E-11 2

-1.93121877E+07-5.10162219E+03-1.09678880E+02 3.71011390E+00 1.53448945E-03 3

-8.33671517E-06 5.21399912E-09-1.90421657E+07 3.36082701E+02 4

(B2O3)127 021221B 254O 381 G 100.0 3000.0 800.0 1

9.44274526E+02 1.63666300E+00-1.05207291E-03 3.01835515E-07-3.29700871E-11 2

-1.94672084E+07-5.14269089E+03-1.10525916E+02 3.73935735E+00 1.54858917E-03 3

-8.40684680E-06 5.25771980E-09-1.91950381E+07 3.38388305E+02 4

(B2O3)128 021221B 256O 384 G 100.0 3000.0 800.0 1

9.51814025E+02 1.64926169E+00-1.06014090E-03 3.04146314E-07-3.32225003E-11 2

-1.96222481E+07-5.18394412E+03-1.11427304E+02 3.76983875E+00 1.55606878E-03 3

-8.46573572E-06 5.29535438E-09-1.93479172E+07 3.40842860E+02 4

(B2O3)129 021221B 258O 387 G 100.0 3000.0 800.0 1

9.59287371E+02 1.66210512E+00-1.06838041E-03 3.06506100E-07-3.34799060E-11 2

-1.97772607E+07-5.22482316E+03-1.12351458E+02 3.80033958E+00 1.56549065E-03 3

-8.52929973E-06 5.33592040E-09-1.95008011E+07 3.43390953E+02 4

(B2O3)130 021221B 260O 390 G 100.0 3000.0 800.0 1

9.66882237E+02 1.67465089E+00-1.07642527E-03 3.08806699E-07-3.37307378E-11 2

-1.99323207E+07-5.26634577E+03-1.13262438E+02 3.83077828E+00 1.57442061E-03 3

-8.59146631E-06 5.37554950E-09-1.96536914E+07 3.45899037E+02 4

(B2O3)131 021221B 262O 393 G 100.0 3000.0 800.0 1

9.74276183E+02 1.68763132E+00-1.08478631E-03 3.11203585E-07-3.39920187E-11 2

-2.00873380E+07-5.30687472E+03-1.14144990E+02 3.86044980E+00 1.58626810E-03 3

-8.65790511E-06 5.41736350E-09-1.98065862E+07 3.48315098E+02 4

(B2O3)132 021221B 264O 396 G 100.0 3000.0 800.0 1

9.81983816E+02 1.69994710E+00-1.09270788E-03 3.13480578E-07-3.42415075E-11 2

-2.02424494E+07-5.34905421E+03-1.14925137E+02 3.88889121E+00 1.60272453E-03 3

-8.73076522E-06 5.46217153E-09-1.99594869E+07 3.50381176E+02 4

(B2O3)133 021221B 266O 399 G 100.0 3000.0 800.0 1

9.89495493E+02 1.71260584E+00-1.10080043E-03 3.15794898E-07-3.44939324E-11 2

-2.03974948E+07-5.39012063E+03-1.15851436E+02 3.91951491E+00 1.61090545E-03 3

-8.79194561E-06 5.50137288E-09-2.01123919E+07 3.52936225E+02 4

(B2O3)134 021221B 268O 402 G 100.0 3000.0 800.0 1

9.96916315E+02 1.72550081E+00-1.10910932E-03 3.18180787E-07-3.47546787E-11 2

-2.05525326E+07-5.43076774E+03-1.16692187E+02 3.94902891E+00 1.62237371E-03 3

-8.85698389E-06 5.54220139E-09-2.02653024E+07 3.55190141E+02 4

(B2O3)135 021221B 270O 405 G 100.0 3000.0 800.0 1

1.00429257E+03 1.73861367E+00-1.11759983E-03 3.20625655E-07-3.50221708E-11 2

-2.07075590E+07-5.47115983E+03-1.17621655E+02 3.97973837E+00 1.63030208E-03 3

-8.91773897E-06 5.58118859E-09-2.04182183E+07 3.57753665E+02 4

(B2O3)136 021221B 272O 408 G 100.0 3000.0 800.0 1

1.01177102E+03 1.75145781E+00-1.12591701E-03 3.23022590E-07-3.52845317E-11 2

-2.08626225E+07-5.51210942E+03-1.18506623E+02 4.00974540E+00 1.64073047E-03 3

-8.98197979E-06 5.62183072E-09-2.05711394E+07 3.60165622E+02 4

(B2O3)137 021221B 274O 411 G 100.0 3000.0 800.0 1

1.01932467E+03 1.76403849E+00-1.13389724E-03 3.25288857E-07-3.55306884E-11 2

-2.10177131E+07-5.55346893E+03-1.19473830E+02 4.04056487E+00 1.64819638E-03 3

-9.04159270E-06 5.65997915E-09-2.07240656E+07 3.62860054E+02 4

(B2O3)138 021221B 276O 414 G 100.0 3000.0 800.0 1

1.02693926E+03 1.77659924E+00-1.14205257E-03 3.27648694E-07-3.57901491E-11 2

-2.11728201E+07-5.59511335E+03-1.20405580E+02 4.07123281E+00 1.65661857E-03 3

-9.10349826E-06 5.69964857E-09-2.08769951E+07 3.65433317E+02 4

(B2O3)139 021221B 278O 417 G 100.0 3000.0 800.0 1

1.03431964E+03 1.78946618E+00-1.15025798E-03 3.29985022E-07-3.60437823E-11 2

-2.13278526E+07-5.63545844E+03-1.21356689E+02 4.10225311E+00 1.66318763E-03 3

-9.16261010E-06 5.73800482E-09-2.10299310E+07 3.68063966E+02 4

(B2O3)140 021221B 280O 420 G 100.0 3000.0 800.0 1

1.04190185E+03 1.80210103E+00-1.15840952E-03 3.32331950E-07-3.63011598E-11 2

-2.14829674E+07-5.67695599E+03-1.22253252E+02 4.13258448E+00 1.67198781E-03 3

-9.22388389E-06 5.77692288E-09-2.11828715E+07 3.70508309E+02 4

(B2O3)141 021221B 282O 423 G 100.0 3000.0 800.0 1

1.04961758E+03 1.81447167E+00-1.16636958E-03 3.34620526E-07-3.65519405E-11 2

-2.16381273E+07-5.71919075E+03-1.23010381E+02 4.16081880E+00 1.68918932E-03 3

-9.29748466E-06 5.82192076E-09-2.13358180E+07 3.72486998E+02 4

(B2O3)142 021221B 284O 426 G 100.0 3000.0 800.0 1

1.05710415E+03 1.82726576E+00-1.17459677E-03 3.36980825E-07-3.68098637E-11 2

-2.17932142E+07-5.76014746E+03-1.23933124E+02 4.19136843E+00 1.69788384E-03 3

-9.35957824E-06 5.86164176E-09-2.14887672E+07 3.75030197E+02 4

(B2O3)143 021221B 286O 429 G 100.0 3000.0 800.0 1

1.06451862E+03 1.84028104E+00-1.18303216E-03 3.39407066E-07-3.70746113E-11 2

-2.19482973E+07-5.80077814E+03-1.24957068E+02 4.22267317E+00 1.70474635E-03 3

-9.41982241E-06 5.90069204E-09-2.16417222E+07 3.77949998E+02 4

(B2O3)144 021221B 288O 432 G 100.0 3000.0 800.0 1

1.07186727E+03 1.85334177E+00-1.19142604E-03 3.41811463E-07-3.73366581E-11 2

-2.21033729E+07-5.84107265E+03-1.25804114E+02 4.25226576E+00 1.71535829E-03 3

-9.48298926E-06 5.94041770E-09-2.17946812E+07 3.80229258E+02 4

(B2O3)145 021221B 290O 435 G 100.0 3000.0 800.0 1

1.07948214E+03 1.86575248E+00-1.19935813E-03 3.44080404E-07-3.75845656E-11 2

-2.22584996E+07-5.88265460E+03-1.26716477E+02 4.28276632E+00 1.72442516E-03 3

-9.54607583E-06 5.98079002E-09-2.19476456E+07 3.82731538E+02 4

(B2O3)146 021221B 292O 438 G 100.0 3000.0 800.0 1

1.08708513E+03 1.87824564E+00-1.20734586E-03 3.46365737E-07-3.78341894E-11 2

-2.24136371E+07-5.92423336E+03-1.27571478E+02 4.31243395E+00 1.73610879E-03 3

-9.61198399E-06 6.02215128E-09-2.21006138E+07 3.85034153E+02 4

(B2O3)147 021221B 294O 441 G 100.0 3000.0 800.0 1

1.09453015E+03 1.89109117E+00-1.21561910E-03 3.48741565E-07-3.80938562E-11 2

-2.25687490E+07-5.96501280E+03-1.28502115E+02 4.34271887E+00 1.74559725E-03 3

-9.67498991E-06 6.06225321E-09-2.22535872E+07 3.87632911E+02 4

(B2O3)148 021221B 296O 444 G 100.0 3000.0 800.0 1

1.10207073E+03 1.90378235E+00-1.22380689E-03 3.51091862E-07-3.83502091E-11 2

-2.27238846E+07-6.00629490E+03-1.29355800E+02 4.37225724E+00 1.75784957E-03 3

-9.74180092E-06 6.10409998E-09-2.24065641E+07 3.89936833E+02 4

(B2O3)149 021221B 298O 447 G 100.0 3000.0 800.0 1

1.10954169E+03 1.91673245E+00-1.23223977E-03 3.53533980E-07-3.86185715E-11 2

-2.28790161E+07-6.04724583E+03-1.30244717E+02 4.40200256E+00 1.77002915E-03 3

-9.80924566E-06 6.14658991E-09-2.25595459E+07 3.92385181E+02 4

(B2O3)150 021221B 300O 450 G 100.0 3000.0 800.0 1

1.11706424E+03 1.92930661E+00-1.24024452E-03 3.55817920E-07-3.88678168E-11 2

-2.30341454E+07-6.08836783E+03-1.31151286E+02 4.43256736E+00 1.77745693E-03 3

-9.86836006E-06 6.18441616E-09-2.27125308E+07 3.94857327E+02 4

(B2O3)151 021221B 302O 453 G 100.0 3000.0 800.0 1

1.12463524E+03 1.94197503E+00-1.24839464E-03 3.58156377E-07-3.91233181E-11 2

-2.31893037E+07-6.12979735E+03-1.32003970E+02 4.46222614E+00 1.78937722E-03 3

-9.93477143E-06 6.22611928E-09-2.28655222E+07 3.97158788E+02 4

(B2O3)152 021221B 304O 456 G 100.0 3000.0 800.0 1

1.13196853E+03 1.95517600E+00-1.25691683E-03 3.60597306E-07-3.93888143E-11 2

-2.33443929E+07-6.16995588E+03-1.32961516E+02 4.49324405E+00 1.79651687E-03 3

-9.99477769E-06 6.26488372E-09-2.30185164E+07 3.99816961E+02 4

(B2O3)153 021221B 306O 459 G 100.0 3000.0 800.0 1

1.13949388E+03 1.96770754E+00-1.26492810E-03 3.62888047E-07-3.96384061E-11 2

-2.34995281E+07-6.21106778E+03-1.33853167E+02 4.52358245E+00 1.80527301E-03 3

-1.00566046E-05 6.30435238E-09-2.31715151E+07 4.02233951E+02 4

(B2O3)154 021221B 308O 462 G 100.0 3000.0 800.0 1

1.14719704E+03 1.98002657E+00-1.27282768E-03 3.65155760E-07-3.98871475E-11 2

-2.36547402E+07-6.25320791E+03-1.34701185E+02 4.55296715E+00 1.81841062E-03 3

-1.01250921E-05 6.34722258E-09-2.33245182E+07 4.04530850E+02 4

(B2O3)155 021221B 310O 465 G 100.0 3000.0 800.0 1

1.15457003E+03 1.99297931E+00-1.28114782E-03 3.67537703E-07-4.01467289E-11 2

-2.38098578E+07-6.29357728E+03-1.35550572E+02 4.58285728E+00 1.82755790E-03 3

-1.01858176E-05 6.38554778E-09-2.34775255E+07 4.06804706E+02 4

(B2O3)156 021221B 312O 468 G 100.0 3000.0 800.0 1

1.16209399E+03 2.00574949E+00-1.28939163E-03 3.69905907E-07-4.04052392E-11 2

-2.39650173E+07-6.33475385E+03-1.36385211E+02 4.61216801E+00 1.84117708E-03 3

-1.02550734E-05 6.42875934E-09-2.36305369E+07 4.09045960E+02 4

(B2O3)157 021221B 314O 471 G 100.0 3000.0 800.0 1

1.16948931E+03 2.01884472E+00-1.29793807E-03 3.72390084E-07-4.06793292E-11 2

-2.41201690E+07-6.37532490E+03-1.37438545E+02 4.64397368E+00 1.84530715E-03 3

-1.03105430E-05 6.46520318E-09-2.37835523E+07 4.12056910E+02 4

(B2O3)158 021221B 316O 474 G 100.0 3000.0 800.0 1

1.17715891E+03 2.03113039E+00-1.30571293E-03 3.74587649E-07-4.09167024E-11 2

-2.42753593E+07-6.41718274E+03-1.38344352E+02 4.67425083E+00 1.85590608E-03 3

-1.03762873E-05 6.50698061E-09-2.39365716E+07 4.14542675E+02 4

(B2O3)159 021221B 318O 477 G 100.0 3000.0 800.0 1

1.18488598E+03 2.04336848E+00-1.31353321E-03 3.76827638E-07-4.11619443E-11 2

-2.44305882E+07-6.45940797E+03-1.39253679E+02 4.70479664E+00 1.86422857E-03 3

-1.04373126E-05 6.54592152E-09-2.40895947E+07 4.17021168E+02 4

(B2O3)160 021221B 320O 480 G 100.0 3000.0 800.0 1

1.19213177E+03 2.05666175E+00-1.32214218E-03 3.79307279E-07-4.14331287E-11 2

-2.45856911E+07-6.49911601E+03-1.40135277E+02 4.73504913E+00 1.87251522E-03 3

-1.04975401E-05 6.58435369E-09-2.42426213E+07 4.19406350E+02 4

(B2O3)161 021221B 322O 483 G 100.0 3000.0 800.0 1

1.19962845E+03 2.06941139E+00-1.33034579E-03 3.81661460E-07-4.16901849E-11 2

-2.47408571E+07-6.54009994E+03-1.41047654E+02 4.76552006E+00 1.88162979E-03 3

-1.05604641E-05 6.62455262E-09-2.43956534E+07 4.21912945E+02 4

(B2O3)162 021221B 324O 486 G 100.0 3000.0 800.0 1

1.20705945E+03 2.08238429E+00-1.33870730E-03 3.84058751E-07-4.19516580E-11 2

-2.48960146E+07-6.58077254E+03-1.41994333E+02 4.79646646E+00 1.88886483E-03 3

-1.06204593E-05 6.66326100E-09-2.45486871E+07 4.24529986E+02 4

(B2O3)163 021221B 326O 489 G 100.0 3000.0 800.0 1

1.21476319E+03 2.09470510E+00-1.34661122E-03 3.86328624E-07-4.22004519E-11 2

-2.50512601E+07-6.62291655E+03-1.42783336E+02 4.82530450E+00 1.90316447E-03 3

-1.06893966E-05 6.70580223E-09-2.47017259E+07 4.26608798E+02 4

(B2O3)164 021221B 328O 492 G 100.0 3000.0 800.0 1

1.22224905E+03 2.10754059E+00-1.35490471E-03 3.88713816E-07-4.24612249E-11 2

-2.52064388E+07-6.66387166E+03-1.43703393E+02 4.85598069E+00 1.91118591E-03 3

-1.07503001E-05 6.74483738E-09-2.48547679E+07 4.29127967E+02 4

(B2O3)165 021221B 330O 495 G 100.0 3000.0 800.0 1

1.22974881E+03 2.12032703E+00-1.36317359E-03 3.91094466E-07-4.27218913E-11 2

-2.53616416E+07-6.70494811E+03-1.44568013E+02 4.88592903E+00 1.92080233E-03 3

-1.08123066E-05 6.78401641E-09-2.50078149E+07 4.31461492E+02 4

(B2O3)166 021221B 332O 498 G 100.0 3000.0 800.0 1

1.23736602E+03 2.13258162E+00-1.37089846E-03 3.93276818E-07-4.29577159E-11 2

-2.55168582E+07-6.74657880E+03-1.45372458E+02 4.91435595E+00 1.93796297E-03 3

-1.08873060E-05 6.83034816E-09-2.51608649E+07 4.33628880E+02 4

(B2O3)167 021221B 334O 501 G 100.0 3000.0 800.0 1

1.24481088E+03 2.14555143E+00-1.37927959E-03 3.95692235E-07-4.32227022E-11 2

-2.56720417E+07-6.78733594E+03-1.46312011E+02 4.94515858E+00 1.94589413E-03 3

-1.09484724E-05 6.86971252E-09-2.53139177E+07 4.36225336E+02 4

(B2O3)168 021221B 336O 504 G 100.0 3000.0 800.0 1

1.25228341E+03 2.15836660E+00-1.38752721E-03 3.98059333E-07-4.34814108E-11 2

-2.58272382E+07-6.82823162E+03-1.47199388E+02 4.97558583E+00 1.95363162E-03 3

-1.10076955E-05 6.90747616E-09-2.54669752E+07 4.38625383E+02 4

(B2O3)169 021221B 338O 507 G 100.0 3000.0 800.0 1

1.25977654E+03 2.17115791E+00-1.39577514E-03 4.00425984E-07-4.37395667E-11 2

-2.59824341E+07-6.86922418E+03-1.48074632E+02 5.00554454E+00 1.96456422E-03 3

-1.10729762E-05 6.94870821E-09-2.56200355E+07 4.40997014E+02 4

(B2O3)170 021221B 340O 510 G 100.0 3000.0 800.0 1

1.26706848E+03 2.18441753E+00-1.40435987E-03 4.02893621E-07-4.40087900E-11 2

-2.61375934E+07-6.90920102E+03-1.48928611E+02 5.03533498E+00 1.97488077E-03 3

-1.11362066E-05 6.98862896E-09-2.57731002E+07 4.43296429E+02 4

(B2O3)171 021221B 342O 513 G 100.0 3000.0 800.0 1

1.27470609E+03 2.19690298E+00-1.41247913E-03 4.05249592E-07-4.42684257E-11 2

-2.62928378E+07-6.95094196E+03-1.49824389E+02 5.06564529E+00 1.98460259E-03 3

-1.11999741E-05 7.02916627E-09-2.59261693E+07 4.45736296E+02 4

(B2O3)172 021221B 344O 516 G 100.0 3000.0 800.0 1

1.28248285E+03 2.20885551E+00-1.41998983E-03 4.07378522E-07-4.45004868E-11 2

-2.64481170E+07-6.99336601E+03-1.50743867E+02 5.09629714E+00 1.99264426E-03 3

-1.12610302E-05 7.06832382E-09-2.60792408E+07 4.48257084E+02 4

(B2O3)173 021221B 346O 519 G 100.0 3000.0 800.0 1

1.28990066E+03 2.22191254E+00-1.42847759E-03 4.09827400E-07-4.47685731E-11 2

-2.66033269E+07-7.03402994E+03-1.51683293E+02 5.12664935E+00 2.00256484E-03 3

-1.13252244E-05 7.10922042E-09-2.62323146E+07 4.50889748E+02 4

(B2O3)174 021221B 348O 522 G 100.0 3000.0 800.0 1

1.29729793E+03 2.23478171E+00-1.43665976E-03 4.12143726E-07-4.50184705E-11 2

-2.67585063E+07-7.07449486E+03-1.52534929E+02 5.15638607E+00 2.01358501E-03 3

-1.13898860E-05 7.14988369E-09-2.63853925E+07 4.53168132E+02 4

(B2O3)175 021221B 350O 525 G 100.0 3000.0 800.0 1

1.30484168E+03 2.24747336E+00-1.44487702E-03 4.14518215E-07-4.52794776E-11 2

-2.69137490E+07-7.11576115E+03-1.53468045E+02 5.18735542E+00 2.01993016E-03 3

-1.14480084E-05 7.18748695E-09-2.65384745E+07 4.55731770E+02 4

(B2O3)176 021221B 352O 528 G 100.0 3000.0 800.0 1

1.31260592E+03 2.25973459E+00-1.45272565E-03 4.16767590E-07-4.55257729E-11 2

-2.70690524E+07-7.15822108E+03-1.54293000E+02 5.21628496E+00 2.03591490E-03 3

-1.15213269E-05 7.23287518E-09-2.66915604E+07 4.57949918E+02 4

(B2O3)177 021221B 354O 531 G 100.0 3000.0 800.0 1

1.32027164E+03 2.27198558E+00-1.46057874E-03 4.19020799E-07-4.57724108E-11 2

-2.72243291E+07-7.20010783E+03-1.55158203E+02 5.24621991E+00 2.04585118E-03 3

-1.15844489E-05 7.27284021E-09-2.68446482E+07 4.60288967E+02 4

(B2O3)178 021221B 356O 534 G 100.0 3000.0 800.0 1

1.32734466E+03 2.28581367E+00-1.46959647E-03 4.21623687E-07-4.60568085E-11 2

-2.73794557E+07-7.23895395E+03-1.56014660E+02 5.27620521E+00 2.05498145E-03 3

-1.16453817E-05 7.31142116E-09-2.69977398E+07 4.62578818E+02 4

(B2O3)179 021221B 358O 537 G 100.0 3000.0 800.0 1

1.33483677E+03 2.29843544E+00-1.47764594E-03 4.23916004E-07-4.63056709E-11 2

-2.75346712E+07-7.27986337E+03-1.56934187E+02 5.30678856E+00 2.06373760E-03 3

-1.17081560E-05 7.35170182E-09-2.71508352E+07 4.65105353E+02 4

(B2O3)180 021221B 360O 540 G 100.0 3000.0 800.0 1

1.34239646E+03 2.31103318E+00-1.48570709E-03 4.26221965E-07-4.65573720E-11 2

-2.76899206E+07-7.32117237E+03-1.57890296E+02 5.33786511E+00 2.07077357E-03 3

-1.17682969E-05 7.39061852E-09-2.73039341E+07 4.67753785E+02 4

(B2O3)181 021221B 362O 543 G 100.0 3000.0 800.0 1

1.34996239E+03 2.32371009E+00-1.49390954E-03 4.28586948E-07-4.68170113E-11 2

-2.78451967E+07-7.36258624E+03-1.58762905E+02 5.36815358E+00 2.07890065E-03 3

-1.18278959E-05 7.42850332E-09-2.74570367E+07 4.70102773E+02 4

(B2O3)182 021221B 364O 546 G 100.0 3000.0 800.0 1

1.35762323E+03 2.33600128E+00-1.50171766E-03 4.30805864E-07-4.70577867E-11 2

-2.80004835E+07-7.40446602E+03-1.59576028E+02 5.39686618E+00 2.09492229E-03 3

-1.19008387E-05 7.47359606E-09-2.76101406E+07 4.72290979E+02 4

(B2O3)183 021221B 366O 549 G 100.0 3000.0 800.0 1

1.36515603E+03 2.34881778E+00-1.51007823E-03 4.33232868E-07-4.73250538E-11 2

-2.81557498E+07-7.44569307E+03-1.60520813E+02 5.42781942E+00 2.10215184E-03 3

-1.19609049E-05 7.51235958E-09-2.77632479E+07 4.74903767E+02 4

(B2O3)184 021221B 368O 552 G 100.0 3000.0 800.0 1

1.37259642E+03 2.36168318E+00-1.51835336E-03 4.35607392E-07-4.75844724E-11 2

-2.83109929E+07-7.48644479E+03-1.61324148E+02 5.45698393E+00 2.11454321E-03 3

-1.20267306E-05 7.55335118E-09-2.79163585E+07 4.77021041E+02 4

(B2O3)185 021221B 370O 555 G 100.0 3000.0 800.0 1

1.38019206E+03 2.37429323E+00-1.52643868E-03 4.37914191E-07-4.78351173E-11 2

-2.84662674E+07-7.52795541E+03-1.62243228E+02 5.48751567E+00 2.12407810E-03 3

-1.20904850E-05 7.59392994E-09-2.80694745E+07 4.79545666E+02 4

(B2O3)186 021221B 372O 558 G 100.0 3000.0 800.0 1

1.38770418E+03 2.38690115E+00-1.53449375E-03 4.40214586E-07-4.80858699E-11 2

-2.86215283E+07-7.56904039E+03-1.63250492E+02 5.51865573E+00 2.13139424E-03 3

-1.21516147E-05 7.63355305E-09-2.82225915E+07 4.82407258E+02 4

(B2O3)187 021221B 374O 561 G 100.0 3000.0 800.0 1

1.39518061E+03 2.39964522E+00-1.54271686E-03 4.42586769E-07-4.83465125E-11 2

-2.87767939E+07-7.60999204E+03-1.64013842E+02 5.54719377E+00 2.14607300E-03 3

-1.22209181E-05 7.67637176E-09-2.83757115E+07 4.84392877E+02 4

(B2O3)188 021221B 376O 564 G 100.0 3000.0 800.0 1

1.40269839E+03 2.41241271E+00-1.55097263E-03 4.44964709E-07-4.86066774E-11 2

-2.89320692E+07-7.65112826E+03-1.64943473E+02 5.57810700E+00 2.15258281E-03 3

-1.22789871E-05 7.71378171E-09-2.85288346E+07 4.86941608E+02 4

(B2O3)189 021221B 378O 567 G 100.0 3000.0 800.0 1

1.41034974E+03 2.42500930E+00-1.55911008E-03 4.47306090E-07-4.88631382E-11 2

-2.90873814E+07-7.69296382E+03-1.65869567E+02 5.60875200E+00 2.16181085E-03 3

-1.23423272E-05 7.75418373E-09-2.86819628E+07 4.89493481E+02 4

(B2O3)190 021221B 380O 570 G 100.0 3000.0 800.0 1

1.41775328E+03 2.43777887E+00-1.56720480E-03 4.49598947E-07-4.91111916E-11 2

-2.92426148E+07-7.73343393E+03-1.66759161E+02 5.63919745E+00 2.16942532E-03 3

-1.24017143E-05 7.79221376E-09-2.88350916E+07 4.91899130E+02 4

(B2O3)191 021221B 382O 573 G 100.0 3000.0 800.0 1

1.42508728E+03 2.45101558E+00-1.57580489E-03 4.52080886E-07-4.93831039E-11 2

-2.93978525E+07-7.77364304E+03-1.67633297E+02 5.66910343E+00 2.18016668E-03 3

-1.24663108E-05 7.83305111E-09-2.89882232E+07 4.94272010E+02 4

(B2O3)192 021221B 384O 576 G 100.0 3000.0 800.0 1

1.43270826E+03 2.46349717E+00-1.58386372E-03 4.54400365E-07-4.96370528E-11 2

-2.95531643E+07-7.81530607E+03-1.68498136E+02 5.69921439E+00 2.18961001E-03 3

-1.25286450E-05 7.87255201E-09-2.91413597E+07 4.96592521E+02 4

(B2O3)193 021221B 386O 579 G 100.0 3000.0 800.0 1

1.44021649E+03 2.47598425E+00-1.59183180E-03 4.56683653E-07-4.98869393E-11 2

-2.97084257E+07-7.85627927E+03-1.69398897E+02 5.72962880E+00 2.19846907E-03 3

-1.25913669E-05 7.91278176E-09-2.92944988E+07 4.99052721E+02 4

(B2O3)194 021221B 388O 582 G 100.0 3000.0 800.0 1

1.44789639E+03 2.48842762E+00-1.59981641E-03 4.58970367E-07-5.01367978E-11 2

-2.98637622E+07-7.89825990E+03-1.70300481E+02 5.76005949E+00 2.20760940E-03 3

-1.26537921E-05 7.95248342E-09-2.94476404E+07 5.01519256E+02 4

(B2O3)195 021221B 390O 585 G 100.0 3000.0 800.0 1

1.45527851E+03 2.50140071E+00-1.60818904E-03 4.61376160E-07-5.03993899E-11 2

-3.00190085E+07-7.93863742E+03-1.71252879E+02 5.79122290E+00 2.21352840E-03 3

-1.27117490E-05 7.99016355E-09-2.96007846E+07 5.04145760E+02 4

(B2O3)196 021221B 392O 588 G 100.0 3000.0 800.0 1

1.46303395E+03 2.51372016E+00-1.61611291E-03 4.63644481E-07-5.06466746E-11 2

-3.01743595E+07-7.98100696E+03-1.72127944E+02 5.82100314E+00 2.22676152E-03 3

-1.27816339E-05 8.03401740E-09-2.97539311E+07 5.06527150E+02 4

(B2O3)197 021221B 394O 591 G 100.0 3000.0 800.0 1

1.47030752E+03 2.52702937E+00-1.62474702E-03 4.66142175E-07-5.09213158E-11 2

-3.03296074E+07-8.02091373E+03-1.73007438E+02 5.85152106E+00 2.23287272E-03 3

-1.28373295E-05 8.06973907E-09-2.99070799E+07 5.08880620E+02 4

(B2O3)198 021221B 396O 594 G 100.0 3000.0 800.0 1

1.47791564E+03 2.53936069E+00-1.63253591E-03 4.68342943E-07-5.11592405E-11 2

-3.04849212E+07-8.06248499E+03-1.73771387E+02 5.87969813E+00 2.25069889E-03 3

-1.29129298E-05 8.11621973E-09-3.00602333E+07 5.10893970E+02 4

(B2O3)199 021221B 398O 597 G 100.0 3000.0 800.0 1

1.48545855E+03 2.55216309E+00-1.64089371E-03 4.70768400E-07-5.14260118E-11 2

-3.06402468E+07-8.10381421E+03-1.74655492E+02 5.90947646E+00 2.26254531E-03 3

-1.29796142E-05 8.15818884E-09-3.02133889E+07 5.13319791E+02 4

(B2O3)200 021221B 400O 600 G 100.0 3000.0 800.0 1

1.49289937E+03 2.56491734E+00-1.64904224E-03 4.73090802E-07-5.16783227E-11 2

-3.07955281E+07-8.14452706E+03-1.75583304E+02 5.93982992E+00 2.27193021E-03 3

-1.30429009E-05 8.19860979E-09-3.03665466E+07 5.15890288E+02 4

(B2O3)201 021221B 402O 603 G 100.0 3000.0 800.0 1

1.50046646E+03 2.57729028E+00-1.65690422E-03 4.75328660E-07-5.19219560E-11 2

-3.09508382E+07-8.18583528E+03-1.76479925E+02 5.97036091E+00 2.27936202E-03 3

-1.31022678E-05 8.23667388E-09-3.05197086E+07 5.18329396E+02 4

(B2O3)202 021221B 404O 606 G 100.0 3000.0 800.0 1

1.50796290E+03 2.59023987E+00-1.66528574E-03 4.77741939E-07-5.21860750E-11 2

-3.11061473E+07-8.22687641E+03-1.77379137E+02 6.00066303E+00 2.28957546E-03 3

-1.31668949E-05 8.27776123E-09-3.06728727E+07 5.20784684E+02 4

(B2O3)203 021221B 406O 609 G 100.0 3000.0 800.0 1

1.51549552E+03 2.60294980E+00-1.67350008E-03 4.80110832E-07-5.24458594E-11 2

-3.12614692E+07-8.26809577E+03-1.78273517E+02 6.03119274E+00 2.29703604E-03 3

-1.32257624E-05 8.31532435E-09-3.08260386E+07 5.23202742E+02 4

(B2O3)204 021221B 408O 612 G 100.0 3000.0 800.0 1

1.52292182E+03 2.61596826E+00-1.68194496E-03 4.82546956E-07-5.27129351E-11 2

-3.14167601E+07-8.30873856E+03-1.79189536E+02 6.06186313E+00 2.30517558E-03 3

-1.32869507E-05 8.35456523E-09-3.09792087E+07 5.25709474E+02 4

(B2O3)205 021221B 410O 615 G 100.0 3000.0 800.0 1

1.53047037E+03 2.62841789E+00-1.68984078E-03 4.84788656E-07-5.29560644E-11 2

-3.15720737E+07-8.34995940E+03-1.80063644E+02 6.09182345E+00 2.31588887E-03 3

-1.33522681E-05 8.39605668E-09-3.11323807E+07 5.28083823E+02 4

(B2O3)206 021221B 412O 618 G 100.0 3000.0 800.0 1

1.53804843E+03 2.64072666E+00-1.69761085E-03 4.86979469E-07-5.31921438E-11 2

-3.17273855E+07-8.39131336E+03-1.80885824E+02 6.12118333E+00 2.32839591E-03 3

-1.34194212E-05 8.43802303E-09-3.12855542E+07 5.30265839E+02 4

(B2O3)207 021221B 414O 621 G 100.0 3000.0 800.0 1

1.54563412E+03 2.65372877E+00-1.70617104E-03 4.89483921E-07-5.34697633E-11 2

-3.18827566E+07-8.43291499E+03-1.81802081E+02 6.15182293E+00 2.33698285E-03 3

-1.34808428E-05 8.47716903E-09-3.14387319E+07 5.32772410E+02 4

(B2O3)208 021221B 416O 624 G 100.0 3000.0 800.0 1

1.55319666E+03 2.66628040E+00-1.71422323E-03 4.91792889E-07-5.37223256E-11 2

-3.20380999E+07-8.47428505E+03-1.82658869E+02 6.18162387E+00 2.34751220E-03 3

-1.35447466E-05 8.51751374E-09-3.15919111E+07 5.35079898E+02 4

(B2O3)209 021221B 418O 627 G 100.0 3000.0 800.0 1

1.56064688E+03 2.67905749E+00-1.72241401E-03 4.94134677E-07-5.39773768E-11 2

-3.21933995E+07-8.51500768E+03-1.83577168E+02 6.21229576E+00 2.35543916E-03 3

-1.36057222E-05 8.55670157E-09-3.17450942E+07 5.37591268E+02 4

(B2O3)210 021221B 420O 630 G 100.0 3000.0 800.0 1

1.56798948E+03 2.69226805E+00-1.73101173E-03 4.96621388E-07-5.42500292E-11 2

-3.23486910E+07-8.55524435E+03-1.84423458E+02 6.24214048E+00 2.36556232E-03 3

-1.36685619E-05 8.59633944E-09-3.18982788E+07 5.39858328E+02 4

(B2O3)211 021221B 422O 633 G 100.0 3000.0 800.0 1

1.57580405E+03 2.70418705E+00-1.73860289E-03 4.98790370E-07-5.44870120E-11 2

-3.25040940E+07-8.59786154E+03-1.85344564E+02 6.27287181E+00 2.37350443E-03 3

-1.37296819E-05 8.63552738E-09-3.20514671E+07 5.42379422E+02 4

(B2O3)212 021221B 424O 636 G 100.0 3000.0 800.0 1

1.58322933E+03 2.71703111E+00-1.74677550E-03 5.01105764E-07-5.47373250E-11 2

-3.26594004E+07-8.63848847E+03-1.86176112E+02 6.30226424E+00 2.38599484E-03 3

-1.37967102E-05 8.67750802E-09-3.22046568E+07 5.44605532E+02 4

(B2O3)213 021221B 426O 639 G 100.0 3000.0 800.0 1

1.59065312E+03 2.73005396E+00-1.75526534E-03 5.03570930E-07-5.50090650E-11 2

-3.28147207E+07-8.67913886E+03-1.87083689E+02 6.33302424E+00 2.39284911E-03 3

-1.38552972E-05 8.71527372E-09-3.23578477E+07 5.47071841E+02 4

(B2O3)214 021221B 428O 642 G 100.0 3000.0 800.0 1

1.59835900E+03 2.74223491E+00-1.76298381E-03 5.05757093E-07-5.52456417E-11 2

-3.29700909E+07-8.72116209E+03-1.88003285E+02 6.36352193E+00 2.40287075E-03 3

-1.39205271E-05 8.75687165E-09-3.25110448E+07 5.49598138E+02 4

(B2O3)215 021221B 430O 645 G 100.0 3000.0 800.0 1

1.60553490E+03 2.75575757E+00-1.77181291E-03 5.08322545E-07-5.55282082E-11 2

-3.31253565E+07-8.76052916E+03-1.88874764E+02 6.39394123E+00 2.40941377E-03 3

-1.39770744E-05 8.79310681E-09-3.26642430E+07 5.51937452E+02 4

(B2O3)216 021221B 432O 648 G 100.0 3000.0 800.0 1

1.61336795E+03 2.76782571E+00-1.77950407E-03 5.10509488E-07-5.57657620E-11 2

-3.32807890E+07-8.80333316E+03-1.89744356E+02 6.42330117E+00 2.42439702E-03 3

-1.40496695E-05 8.83839170E-09-3.28174422E+07 5.54319279E+02 4

(B2O3)217 021221B 434O 651 G 100.0 3000.0 800.0 1

1.62077588E+03 2.78077967E+00-1.78789035E-03 5.12925012E-07-5.60300880E-11 2

-3.34361058E+07-8.84385774E+03-1.90656724E+02 6.45412891E+00 2.43093403E-03 3

-1.41077814E-05 8.87587246E-09-3.29706450E+07 5.56803076E+02 4

(B2O3)218 021221B 436O 654 G 100.0 3000.0 800.0 1

1.62826157E+03 2.79348261E+00-1.79603829E-03 5.15268285E-07-5.62872918E-11 2

-3.35914407E+07-8.88476075E+03-1.91553200E+02 6.48465127E+00 2.43899093E-03 3

-1.41686327E-05 8.91494918E-09-3.31238487E+07 5.59247933E+02 4

(B2O3)219 021221B 438O 657 G 100.0 3000.0 800.0 1

1.63585516E+03 2.80588267E+00-1.80392612E-03 5.17512080E-07-5.65309726E-11 2

-3.37468121E+07-8.92627608E+03-1.92430815E+02 6.51473028E+00 2.44851344E-03 3

-1.42311184E-05 8.95456613E-09-3.32770557E+07 5.61610321E+02 4

(B2O3)220 021221B 440O 660 G 100.0 3000.0 800.0 1

1.64331416E+03 2.81882074E+00-1.81225629E-03 5.19891640E-07-5.67893436E-11 2

-3.39021552E+07-8.96713432E+03-1.93207352E+02 6.54320194E+00 2.46515241E-03 3

-1.43043679E-05 8.99959714E-09-3.34302662E+07 5.63656184E+02 4

(B2O3)221 021221B 442O 663 G 100.0 3000.0 800.0 1

1.65087925E+03 2.83141480E+00-1.82038634E-03 5.22234367E-07-5.70464336E-11 2

-3.40575264E+07-9.00849022E+03-1.94140775E+02 6.57425402E+00 2.47113909E-03 3

-1.43620202E-05 9.03697388E-09-3.35834774E+07 5.66211204E+02 4

(B2O3)222 021221B 444O 666 G 100.0 3000.0 800.0 1

1.65835885E+03 2.84421322E+00-1.82862637E-03 5.24598504E-07-5.73044222E-11 2

-3.42128668E+07-9.04938569E+03-1.95030797E+02 6.60447063E+00 2.48124753E-03 3

-1.44263667E-05 9.07784838E-09-3.37366918E+07 5.68630652E+02 4

(B2O3)223 021221B 446O 669 G 100.0 3000.0 800.0 1

1.66591296E+03 2.85700230E+00-1.83695408E-03 5.27023007E-07-5.75728443E-11 2

-3.43682503E+07-9.09072118E+03-1.95966414E+02 6.63544564E+00 2.48824119E-03 3

-1.44859589E-05 9.11636868E-09-3.38899095E+07 5.71206292E+02 4

(B2O3)224 021221B 448O 672 G 100.0 3000.0 800.0 1

1.67330488E+03 2.86976109E+00-1.84508249E-03 5.29328112E-07-5.78218277E-11 2

-3.45235625E+07-9.13110268E+03-1.96848491E+02 6.66581541E+00 2.49622610E-03 3

-1.45461494E-05 9.15486592E-09-3.40431277E+07 5.73586537E+02 4

(B2O3)225 021221B 450O 675 G 100.0 3000.0 800.0 1

1.68106766E+03 2.88201583E+00-1.85297159E-03 5.31598794E-07-5.80710752E-11 2

-3.46789987E+07-9.17352850E+03-1.97714509E+02 6.69577193E+00 2.50731864E-03 3

-1.46116019E-05 9.19610445E-09-3.41963490E+07 5.75915077E+02 4

(B2O3)226 021221B 452O 678 G 100.0 3000.0 800.0 1

1.68829519E+03 2.89535667E+00-1.86157294E-03 5.34061959E-07-5.83390705E-11 2

-3.48342889E+07-9.21312439E+03-1.98580584E+02 6.72572661E+00 2.51727378E-03 3

-1.46746905E-05 9.23609255E-09-3.43495734E+07 5.78257895E+02 4

(B2O3)227 021221B 454O 681 G 100.0 3000.0 800.0 1

1.69598808E+03 2.90754618E+00-1.86931539E-03 5.36268257E-07-5.85794930E-11 2

-3.49897039E+07-9.25514068E+03-1.99519090E+02 6.75616404E+00 2.52705956E-03 3

-1.47391998E-05 9.27729104E-09-3.45027982E+07 5.80874566E+02 4

(B2O3)228 021221B 456O 684 G 100.0 3000.0 800.0 1

1.70336360E+03 2.92063737E+00-1.87779357E-03 5.38706079E-07-5.88456811E-11 2

-3.51450438E+07-9.29551562E+03-2.00415092E+02 6.78673301E+00 2.53460888E-03 3

-1.47985570E-05 9.31528355E-09-3.46560287E+07 5.83309203E+02 4

(B2O3)229 021221B 458O 687 G 100.0 3000.0 800.0 1

1.71128366E+03 2.93256700E+00-1.88547546E-03 5.40921662E-07-5.90896129E-11 2

-3.53005667E+07-9.33890144E+03-2.01420277E+02 6.81736283E+00 2.54411134E-03 3

-1.48619419E-05 9.35545602E-09-3.48092594E+07 5.86183234E+02 4

(B2O3)230 021221B 460O 690 G 100.0 3000.0 800.0 1

1.71873225E+03 2.94523627E+00-1.89351276E-03 5.43198362E-07-5.93357339E-11 2

-3.54559067E+07-9.37960053E+03-2.02285850E+02 6.84706239E+00 2.55610119E-03 3

-1.49292505E-05 9.39793494E-09-3.49624903E+07 5.88528949E+02 4

(B2O3)231 021221B 462O 693 G 100.0 3000.0 800.0 1

1.72602326E+03 2.95870361E+00-1.90240042E-03 5.45801363E-07-5.96240077E-11 2

-3.56112533E+07-9.41964256E+03-2.03157216E+02 6.87697193E+00 2.56648125E-03 3

-1.49929756E-05 9.43826498E-09-3.51157268E+07 5.90890520E+02 4

(B2O3)232 021221B 464O 696 G 100.0 3000.0 800.0 1

1.73371617E+03 2.97090946E+00-1.91007655E-03 5.47960340E-07-5.98566565E-11 2

-3.57666600E+07-9.46161424E+03-2.04164813E+02 6.90881813E+00 2.57106893E-03 3

-1.50498983E-05 9.47560366E-09-3.52689634E+07 5.93677603E+02 4

(B2O3)233 021221B 466O 699 G 100.0 3000.0 800.0 1

1.74107390E+03 2.98400204E+00-1.91863959E-03 5.50448206E-07-6.01305689E-11 2

-3.59220235E+07-9.50199165E+03-2.04932592E+02 6.93721756E+00 2.58625779E-03 3

-1.51198840E-05 9.51875085E-09-3.54222027E+07 5.95692511E+02 4

(B2O3)234 021221B 468O 702 G 100.0 3000.0 800.0 1

1.74860449E+03 2.99665955E+00-1.92670247E-03 5.52742116E-07-6.03796968E-11 2

-3.60774092E+07-9.54314987E+03-2.05832936E+02 6.96775411E+00 2.59444492E-03 3

-1.51805741E-05 9.55750446E-09-3.55754447E+07 5.98143946E+02 4

(B2O3)235 021221B 470O 705 G 100.0 3000.0 800.0 1

1.75638429E+03 3.00870315E+00-1.93438413E-03 5.54937326E-07-6.06193054E-11 2

-3.62328592E+07-9.58559803E+03-2.06745155E+02 6.99832924E+00 2.60334064E-03 3

-1.52434273E-05 9.59769961E-09-3.57286894E+07 6.00629671E+02 4

(B2O3)236 021221B 472O 708 G 100.0 3000.0 800.0 1

1.76380669E+03 3.02165221E+00-1.94269349E-03 5.57313941E-07-6.08783939E-11 2

-3.63882194E+07-9.62618947E+03-2.07692431E+02 7.02940899E+00 2.60995930E-03 3

-1.53025361E-05 9.63599454E-09-3.58819340E+07 6.03250306E+02 4

(B2O3)237 021221B 474O 711 G 100.0 3000.0 800.0 1

1.77117813E+03 3.03463841E+00-1.95115164E-03 5.59763290E-07-6.11473573E-11 2

-3.65435701E+07-9.66652279E+03-2.08585283E+02 7.06012487E+00 2.61624606E-03 3

-1.53599047E-05 9.67300731E-09-3.60351811E+07 6.05649777E+02 4

(B2O3)238 021221B 476O 714 G 100.0 3000.0 800.0 1

1.77871587E+03 3.04736817E+00-1.95930494E-03 5.62086582E-07-6.13995363E-11 2

-3.66989659E+07-9.70774842E+03-2.09438516E+02 7.08971718E+00 2.62903462E-03 3

-1.54280448E-05 9.71566378E-09-3.61884308E+07 6.07954958E+02 4

(B2O3)239 021221B 478O 717 G 100.0 3000.0 800.0 1

1.78635338E+03 3.05978696E+00-1.96730223E-03 5.64397498E-07-6.16541230E-11 2

-3.68543971E+07-9.74947911E+03-2.10356522E+02 7.12052670E+00 2.63612704E-03 3

-1.54874872E-05 9.75399120E-09-3.63416830E+07 6.10461703E+02 4

(B2O3)240 021221B 480O 720 G 100.0 3000.0 800.0 1

1.79380673E+03 3.07255419E+00-1.97545500E-03 5.66718950E-07-6.19060815E-11 2

-3.70097792E+07-9.79027273E+03-2.11098598E+02 7.14870267E+00 2.65278531E-03 3

-1.55600960E-05 9.79854802E-09-3.64949376E+07 6.12384495E+02 4

(B2O3)241 021221B 482O 723 G 100.0 3000.0 800.0 1

1.80129155E+03 3.08543338E+00-1.98385343E-03 5.69156514E-07-6.21747351E-11 2

-3.71651808E+07-9.83123272E+03-2.12059798E+02 7.18008862E+00 2.65773562E-03 3

-1.56164317E-05 9.83536271E-09-3.66481947E+07 6.15039176E+02 4

(B2O3)242 021221B 484O 726 G 100.0 3000.0 800.0 1

1.80876181E+03 3.09817188E+00-1.99193691E-03 5.71441966E-07-6.24213438E-11 2

-3.73205544E+07-9.87203226E+03-2.12981321E+02 7.21090098E+00 2.66547937E-03 3

-1.56773354E-05 9.87455970E-09-3.68014541E+07 6.17556886E+02 4

(B2O3)243 021221B 486O 729 G 100.0 3000.0 800.0 1

1.81637950E+03 3.11056964E+00-1.99990104E-03 5.73730228E-07-6.26719123E-11 2

-3.74759846E+07-9.91367410E+03-2.13809774E+02 7.24040306E+00 2.67701875E-03 3

-1.57424892E-05 9.91535106E-09-3.69547130E+07 6.19757066E+02 4

(B2O3)244 021221B 488O 732 G 100.0 3000.0 800.0 1

1.82384684E+03 3.12335719E+00-2.00808017E-03 5.76064809E-07-6.29259414E-11 2

-3.76313658E+07-9.95446711E+03-2.14727543E+02 7.27125858E+00 2.68442936E-03 3

-1.58028501E-05 9.95428992E-09-3.71079771E+07 6.22258900E+02 4

(B2O3)245 021221B 490O 735 G 100.0 3000.0 800.0 1

1.83151316E+03 3.13587978E+00-2.01625759E-03 5.78444809E-07-6.31889528E-11 2

-3.77868246E+07-9.99639508E+03-2.15662709E+02 7.30209254E+00 2.69232781E-03 3

-1.58641255E-05 9.99371288E-09-3.72612405E+07 6.24835138E+02 4

(B2O3)246 021221B 492O 738 G 100.0 3000.0 800.0 1

1.83893657E+03 3.14864117E+00-2.02436260E-03 5.80740273E-07-6.34371249E-11 2

-3.79421957E+07-1.00369348E+04-2.16550019E+02 7.33265132E+00 2.69979541E-03 3

-1.59235414E-05 1.00318010E-08-3.74145090E+07 6.27234672E+02 4

(B2O3)247 021221B 494O 741 G 100.0 3000.0 800.0 1

1.84666613E+03 3.16088434E+00-2.03227936E-03 5.83025874E-07-6.36881105E-11 2

-3.80976679E+07-1.00791521E+04-2.17313608E+02 7.36121777E+00 2.71578532E-03 3

-1.59962008E-05 1.00767309E-08-3.75677768E+07 6.29246037E+02 4

(B2O3)248 021221B 496O 744 G 100.0 3000.0 800.0 1

1.85395763E+03 3.17409860E+00-2.04077034E-03 5.85453909E-07-6.39522810E-11 2

-3.82530233E+07-1.01191400E+04-2.18211299E+02 7.39130227E+00 2.72587427E-03 3

-1.60597847E-05 1.01169940E-08-3.77210467E+07 6.31673991E+02 4

(B2O3)249 021221B 498O 747 G 100.0 3000.0 800.0 1

1.86160893E+03 3.18646340E+00-2.04870870E-03 5.87738791E-07-6.42033681E-11 2

-3.84084791E+07-1.01609353E+04-2.19118689E+02 7.42198935E+00 2.73314990E-03 3

-1.61191585E-05 1.01551539E-08-3.78743187E+07 6.34153674E+02 4

(B2O3)250 021221B 500O 750 G 100.0 3000.0 800.0 1

1.86885119E+03 3.19982487E+00-2.05731560E-03 5.90199868E-07-6.44706546E-11 2

-3.85638221E+07-1.02006007E+04-2.20044541E+02 7.45289855E+00 2.73966291E-03 3

-1.61773739E-05 1.01927762E-08-3.80275928E+07 6.36687935E+02 4

(B2O3)251 021221B 502O 753 G 100.0 3000.0 800.0 1

1.87671872E+03 3.21180781E+00-2.06500927E-03 5.92407207E-07-6.47122188E-11 2

-3.87193381E+07-1.02435592E+04-2.20855418E+02 7.48183123E+00 2.75561616E-03 3

-1.62509197E-05 1.02383603E-08-3.81808718E+07 6.38850395E+02 4

(B2O3)252 021221B 504O 756 G 100.0 3000.0 800.0 1

1.88397914E+03 3.22508768E+00-2.07365258E-03 5.94907845E-07-6.49865587E-11 2

-3.88746999E+07-1.02833534E+04-2.21732560E+02 7.51221479E+00 2.76268850E-03 3

-1.63086015E-05 1.02752197E-08-3.83341498E+07 6.41209369E+02 4

(B2O3)253 021221B 506O 759 G 100.0 3000.0 800.0 1

1.89170752E+03 3.23729639E+00-2.08141399E-03 5.97118974E-07-6.52276440E-11 2

-3.90301803E+07-1.03255732E+04-2.22652995E+02 7.54243659E+00 2.77378594E-03 3

-1.63752936E-05 1.03175742E-08-3.84874298E+07 6.43755916E+02 4

(B2O3)254 021221B 508O 762 G 100.0 3000.0 800.0 1

1.89919035E+03 3.25004582E+00-2.08961719E-03 5.99471214E-07-6.54843993E-11 2

-3.91856036E+07-1.03665171E+04-2.23527819E+02 7.57250300E+00 2.78329716E-03 3

-1.64377223E-05 1.03571970E-08-3.86407116E+07 6.46129736E+02 4

(B2O3)255 021221B 510O 765 G 100.0 3000.0 800.0 1

1.90654755E+03 3.26305795E+00-2.09804123E-03 6.01904211E-07-6.57513487E-11 2

-3.93409784E+07-1.04067452E+04-2.24445367E+02 7.60337637E+00 2.78993589E-03 3

-1.64964693E-05 1.03951862E-08-3.87939953E+07 6.48629965E+02 4

(B2O3)256 021221B 512O 768 G 100.0 3000.0 800.0 1

1.91424792E+03 3.27546633E+00-2.10599969E-03 6.04174907E-07-6.59982196E-11 2

-3.94964569E+07-1.04488333E+04-2.25329025E+02 7.63355690E+00 2.80040543E-03 3

-1.65610695E-05 1.04359802E-08-3.89472808E+07 6.51018185E+02 4

(B2O3)257 021221B 514O 771 G 100.0 3000.0 800.0 1

1.92190378E+03 3.28785348E+00-2.11395299E-03 6.06462200E-07-6.62491905E-11 2

-3.96519312E+07-1.04906608E+04-2.26187436E+02 7.66358264E+00 2.81034580E-03 3

-1.66243564E-05 1.04760745E-08-3.91005711E+07 6.53328359E+02 4

(B2O3)258 021221B 516O 774 G 100.0 3000.0 800.0 1

1.92929743E+03 3.30084943E+00-2.12228146E-03 6.08835670E-07-6.65069746E-11 2

-3.98073320E+07-1.05311282E+04-2.27095224E+02 7.69429904E+00 2.81735430E-03 3

-1.66829277E-05 1.05136906E-08-3.92538601E+07 6.55791703E+02 4

(B2O3)259 021221B 518O 777 G 100.0 3000.0 800.0 1

1.93673486E+03 3.31375830E+00-2.13065879E-03 6.11259416E-07-6.67731245E-11 2

-3.99627370E+07-1.05717850E+04-2.28020289E+02 7.72514465E+00 2.82493085E-03 3

-1.67437509E-05 1.05529387E-08-3.94071508E+07 6.58328154E+02 4

(B2O3)260 021221B 520O 780 G 100.0 3000.0 800.0 1

1.94436537E+03 3.32620955E+00-2.13864036E-03 6.13543412E-07-6.70224149E-11 2

-4.01182108E+07-1.06135095E+04-2.29034771E+02 7.75671159E+00 2.83042457E-03 3

-1.68018046E-05 1.05908271E-08-3.95604463E+07 6.61179817E+02 4

(B2O3)261 021221B 522O 783 G 100.0 3000.0 800.0 1

1.95184136E+03 3.33900220E+00-2.14688560E-03 6.15915037E-07-6.72820330E-11 2

-4.02736491E+07-1.06544619E+04-2.29764332E+02 7.78501387E+00 2.84555660E-03 3

-1.68710368E-05 1.06332860E-08-3.97137403E+07 6.63035828E+02 4

(B2O3)262 021221B 524O 786 G 100.0 3000.0 800.0 1

1.95942829E+03 3.35151699E+00-2.15494781E-03 6.18231922E-07-6.75354776E-11 2

-4.04291057E+07-1.06959244E+04-2.30630166E+02 7.81477911E+00 2.85754436E-03 3

-1.69384987E-05 1.06758723E-08-3.98670389E+07 6.65382573E+02 4

(B2O3)263 021221B 526O 789 G 100.0 3000.0 800.0 1

1.96678392E+03 3.36471565E+00-2.16354104E-03 6.20714212E-07-6.78073912E-11 2

-4.05845038E+07-1.07361984E+04-2.31560752E+02 7.84578702E+00 2.86411186E-03 3

-1.69971532E-05 1.07137791E-08-4.00203361E+07 6.67924375E+02 4

(B2O3)264 021221B 528O 792 G 100.0 3000.0 800.0 1

1.97452239E+03 3.37678518E+00-2.17115450E-03 6.22865385E-07-6.80401711E-11 2

-4.07400039E+07-1.07784413E+04-2.32458183E+02 7.87568320E+00 2.87618156E-03 3

-1.70652093E-05 1.07568166E-08-4.01736378E+07 6.70400431E+02 4

(B2O3)265 021221B 530O 795 G 100.0 3000.0 800.0 1

1.98197863E+03 3.38958571E+00-2.17934622E-03 6.25207866E-07-6.82956418E-11 2

-4.08954319E+07-1.08192107E+04-2.33335724E+02 7.90624592E+00 2.88309502E-03 3

-1.71230540E-05 1.07938475E-08-4.03269410E+07 6.72749417E+02 4

(B2O3)266 021221B 532O 798 G 100.0 3000.0 800.0 1

1.98958563E+03 3.40225534E+00-2.18760676E-03 6.27607343E-07-6.85601038E-11 2

-4.10509140E+07-1.08608515E+04-2.34202147E+02 7.93610055E+00 2.89443108E-03 3

-1.71887673E-05 1.08352271E-08-4.04802426E+07 6.75091590E+02 4

(B2O3)267 021221B 534O 801 G 100.0 3000.0 800.0 1

1.99711169E+03 3.41479744E+00-2.19558954E-03 6.29881099E-07-6.88074995E-11 2

-4.12063536E+07-1.09019390E+04-2.35130324E+02 7.96713248E+00 2.90055883E-03 3

-1.72468493E-05 1.08729039E-08-4.06335486E+07 6.77627384E+02 4

(B2O3)268 021221B 536O 804 G 100.0 3000.0 800.0 1

2.00447867E+03 3.42776938E+00-2.20393551E-03 6.32266582E-07-6.90669432E-11 2

-4.13617626E+07-1.09422419E+04-2.35967694E+02 7.99685761E+00 2.91129943E-03 3

-1.73112212E-05 1.09135775E-08-4.07868593E+07 6.79858848E+02 4

(B2O3)269 021221B 538O 807 G 100.0 3000.0 800.0 1

2.01203333E+03 3.44045101E+00-2.21208676E-03 6.34602121E-07-6.93217476E-11 2

-4.15172211E+07-1.09835358E+04-2.36877396E+02 8.02736844E+00 2.92042960E-03 3

-1.73740923E-05 1.09536710E-08-4.09401681E+07 6.82349419E+02 4

(B2O3)270 021221B 540O 810 G 100.0 3000.0 800.0 1

2.01949857E+03 3.45334842E+00-2.22049902E-03 6.37045506E-07-6.95910366E-11 2

-4.16726653E+07-1.10243919E+04-2.37748282E+02 8.05759078E+00 2.92948611E-03 3

-1.74360019E-05 1.09930621E-08-4.10934782E+07 6.84688764E+02 4

(B2O3)271 021221B 542O 813 G 100.0 3000.0 800.0 1

2.02724534E+03 3.46549563E+00-2.22821444E-03 6.39243271E-07-6.98305074E-11 2

-4.18281924E+07-1.10667249E+04-2.38696284E+02 8.08816699E+00 2.93858411E-03 3

-1.74989422E-05 1.10332077E-08-4.12467927E+07 6.87335018E+02 4

(B2O3)272 021221B 544O 816 G 100.0 3000.0 800.0 1

2.03468301E+03 3.47832698E+00-2.23648006E-03 6.41618844E-07-7.00904120E-11 2

-4.19836246E+07-1.11073661E+04-2.39635097E+02 8.11939787E+00 2.94376470E-03 3

-1.75554595E-05 1.10700679E-08-4.14001085E+07 6.89914866E+02 4

(B2O3)273 021221B 546O 819 G 100.0 3000.0 800.0 1

2.04209981E+03 3.49116603E+00-2.24468421E-03 6.43947328E-07-7.03420625E-11 2

-4.21390452E+07-1.11479146E+04-2.40491164E+02 8.14901397E+00 2.95633245E-03 3

-1.76238431E-05 1.11131800E-08-4.15534255E+07 6.92226327E+02 4

(B2O3)274 021221B 548O 822 G 100.0 3000.0 800.0 1

2.04978429E+03 3.50355243E+00-2.25265087E-03 6.46240152E-07-7.05936490E-11 2

-4.22945565E+07-1.11899186E+04-2.41356508E+02 8.17922545E+00 2.96547060E-03 3

-1.76855797E-05 1.11522980E-08-4.17067437E+07 6.94537293E+02 4

(B2O3)275 021221B 550O 825 G 100.0 3000.0 800.0 1

2.05719265E+03 3.51644810E+00-2.26093125E-03 6.48612868E-07-7.08526211E-11 2

-4.24499929E+07-1.12304658E+04-2.42175803E+02 8.20856984E+00 2.97756224E-03 3

-1.77515799E-05 1.11936345E-08-4.18600630E+07 6.96720243E+02 4

(B2O3)276 021221B 552O 828 G 100.0 3000.0 800.0 1

2.06477309E+03 3.52918853E+00-2.26918891E-03 6.50995006E-07-7.11139319E-11 2

-4.26054807E+07-1.12719525E+04-2.43064937E+02 8.23891892E+00 2.98703763E-03 3

-1.78145467E-05 1.12336372E-08-4.20133833E+07 6.99117742E+02 4

(B2O3)277 021221B 554O 831 G 100.0 3000.0 800.0 1

2.07220435E+03 3.54211012E+00-2.27759104E-03 6.53425338E-07-7.13805657E-11 2

-4.27609254E+07-1.13125915E+04-2.43980740E+02 8.26978570E+00 2.99357535E-03 3

-1.78728242E-05 1.12712413E-08-4.21667081E+07 7.01621602E+02 4

(B2O3)278 021221B 556O 834 G 100.0 3000.0 800.0 1

2.07975444E+03 3.55467254E+00-2.28562633E-03 6.55723630E-07-7.16313618E-11 2

-4.29163980E+07-1.13538288E+04-2.44908343E+02 8.30082497E+00 2.99972199E-03 3

-1.79309138E-05 1.13089260E-08-4.23200338E+07 7.04156230E+02 4

(B2O3)279 021221B 558O 837 G 100.0 3000.0 800.0 1

2.08743167E+03 3.56703002E+00-2.29351027E-03 6.57965635E-07-7.18747661E-11 2

-4.30718959E+07-1.13957250E+04-2.45796416E+02 8.33101623E+00 3.01079810E-03 3

-1.79974112E-05 1.13510615E-08-4.24733606E+07 7.06573469E+02 4

(B2O3)280 021221B 560O 840 G 100.0 3000.0 800.0 1

2.09474606E+03 3.58014719E+00-2.30201048E-03 6.60420114E-07-7.21439256E-11 2

-4.32273376E+07-1.14358857E+04-2.46651783E+02 8.36021734E+00 3.02337537E-03 3

-1.80639198E-05 1.13925944E-08-4.26266883E+07 7.08901611E+02 4

(B2O3)281 021221B 562O 843 G 100.0 3000.0 800.0 1

2.10238719E+03 3.59257868E+00-2.30993412E-03 6.62674596E-07-7.23888622E-11 2

-4.33828357E+07-1.14776042E+04-2.47566050E+02 8.39077056E+00 3.03260456E-03 3

-1.81273074E-05 1.14330939E-08-4.27800169E+07 7.11417041E+02 4

(B2O3)282 021221B 564O 846 G 100.0 3000.0 800.0 1

2.10992435E+03 3.60517415E+00-2.31803841E-03 6.65004921E-07-7.26439667E-11 2

-4.35383168E+07-1.15188082E+04-2.48433805E+02 8.42098624E+00 3.04143467E-03 3

-1.81888580E-05 1.14723353E-08-4.29333498E+07 7.13739341E+02 4

(B2O3)283 021221B 566O 849 G 100.0 3000.0 800.0 1

2.11747206E+03 3.61785078E+00-2.32619266E-03 6.67344049E-07-7.28994758E-11 2

-4.36938104E+07-1.15601131E+04-2.49234591E+02 8.44996865E+00 3.05544232E-03 3

-1.82578312E-05 1.15151271E-08-4.30866835E+07 7.15867089E+02 4

(B2O3)284 021221B 568O 852 G 100.0 3000.0 800.0 1

2.12499004E+03 3.63058158E+00-2.33441689E-03 6.69707649E-07-7.31579694E-11 2

-4.38492913E+07-1.16012344E+04-2.50079547E+02 8.47993554E+00 3.06512190E-03 3

-1.83201946E-05 1.15545557E-08-4.32400181E+07 7.18113451E+02 4

(B2O3)285 021221B 570O 855 G 100.0 3000.0 800.0 1

2.13257200E+03 3.64316608E+00-2.34253835E-03 6.72053110E-07-7.34159898E-11 2

-4.40047839E+07-1.16426644E+04-2.51003879E+02 8.51065079E+00 3.07358307E-03 3

-1.83826132E-05 1.15946981E-08-4.33933534E+07 7.20649746E+02 4

(B2O3)286 021221B 572O 858 G 100.0 3000.0 800.0 1

2.13980942E+03 3.65636236E+00-2.35099711E-03 6.74465478E-07-7.36776843E-11 2

-4.41601812E+07-1.16822414E+04-2.51940879E+02 8.54192101E+00 3.07793623E-03 3

-1.84373763E-05 1.16305435E-08-4.35466929E+07 7.23217193E+02 4

(B2O3)287 021221B 574O 861 G 100.0 3000.0 800.0 1

2.14733216E+03 3.66917827E+00-2.35931421E-03 6.76864854E-07-7.39402337E-11 2

-4.43156564E+07-1.17233647E+04-2.52845867E+02 8.57246110E+00 3.08741833E-03 3

-1.85013530E-05 1.16713978E-08-4.37000332E+07 7.25672670E+02 4

(B2O3)288 021221B 576O 864 G 100.0 3000.0 800.0 1

2.15508447E+03 3.68139734E+00-2.36717242E-03 6.79126270E-07-7.41885915E-11 2

-4.44712115E+07-1.17657235E+04-2.53681413E+02 8.60200830E+00 3.09965151E-03 3

-1.85682574E-05 1.17133364E-08-4.38533741E+07 7.27913053E+02 4

(B2O3)289 021221B 578O 867 G 100.0 3000.0 800.0 1

2.16255791E+03 3.69407578E+00-2.37520380E-03 6.81398487E-07-7.44344441E-11 2

-4.46266827E+07-1.18065910E+04-2.54506352E+02 8.63168129E+00 3.10988425E-03 3

-1.86308468E-05 1.17526970E-08-4.40067157E+07 7.30090786E+02 4

(B2O3)290 021221B 580O 870 G 100.0 3000.0 800.0 1

2.17004057E+03 3.70696728E+00-2.38357001E-03 6.83810487E-07-7.46983759E-11 2

-4.47821635E+07-1.18475118E+04-2.55443241E+02 8.66270531E+00 3.11679117E-03 3

-1.86904791E-05 1.17912648E-08-4.41600614E+07 7.32670518E+02 4

(B2O3)291 021221B 582O 873 G 100.0 3000.0 800.0 1

2.17745857E+03 3.71975983E+00-2.39181887E-03 6.86190371E-07-7.49597835E-11 2

-4.49376123E+07-1.18880282E+04-2.56393199E+02 8.69411245E+00 3.12137915E-03 3

-1.87465644E-05 1.18281002E-08-4.43134077E+07 7.35270491E+02 4

(B2O3)292 021221B 584O 876 G 100.0 3000.0 800.0 1

2.18517634E+03 3.73199173E+00-2.39963402E-03 6.88420630E-07-7.52027605E-11 2

-4.50931505E+07-1.19301513E+04-2.57281234E+02 8.72438876E+00 3.13116954E-03 3

-1.88102526E-05 1.18685139E-08-4.44667546E+07 7.37691419E+02 4

(B2O3)293 021221B 586O 879 G 100.0 3000.0 800.0 1

2.19271809E+03 3.74463025E+00-2.40774750E-03 6.90747350E-07-7.54569691E-11 2

-4.52486577E+07-1.19714464E+04-2.58048270E+02 8.75307521E+00 3.14557392E-03 3

-1.88792435E-05 1.19111641E-08-4.46201020E+07 7.39671415E+02 4

(B2O3)294 021221B 588O 882 G 100.0 3000.0 800.0 1

2.20020336E+03 3.75742796E+00-2.41599555E-03 6.93111699E-07-7.57147864E-11 2

-4.54041366E+07-1.20123461E+04-2.58970298E+02 8.78386873E+00 3.15342026E-03 3

-1.89403904E-05 1.19505254E-08-4.47734534E+07 7.42206631E+02 4

(B2O3)295 021221B 590O 885 G 100.0 3000.0 800.0 1

2.20744260E+03 3.77080018E+00-2.42474253E-03 6.95655420E-07-7.59949865E-11 2

-4.55595668E+07-1.20520344E+04-2.59796414E+02 8.81357492E+00 3.16330330E-03 3

-1.90025196E-05 1.19897655E-08-4.49268052E+07 7.44393992E+02 4

(B2O3)296 021221B 592O 888 G 100.0 3000.0 800.0 1

2.21514913E+03 3.78305292E+00-2.43249564E-03 6.97850295E-07-7.62329605E-11 2

-4.57151128E+07-1.20941317E+04-2.60682361E+02 8.84349163E+00 3.17536297E-03 3

-1.90703893E-05 1.20326285E-08-4.50801611E+07 7.46806909E+02 4

(B2O3)297 021221B 594O 891 G 100.0 3000.0 800.0 1

2.22277423E+03 3.79549026E+00-2.44044084E-03 7.00117917E-07-7.64798845E-11 2

-4.58706286E+07-1.21357684E+04-2.61599422E+02 8.87411053E+00 3.18409301E-03 3

-1.91328350E-05 1.20725622E-08-4.52335138E+07 7.49319802E+02 4

(B2O3)298 021221B 596O 894 G 100.0 3000.0 800.0 1

2.23026313E+03 3.80814363E+00-2.44857034E-03 7.02448841E-07-7.67341777E-11 2

-4.60261265E+07-1.21767508E+04-2.62527861E+02 8.90464452E+00 3.19188226E-03 3

-1.91927066E-05 1.21108152E-08-4.53868705E+07 7.51878393E+02 4

(B2O3)299 021221B 598O 897 G 100.0 3000.0 800.0 1

2.23770534E+03 3.82099508E+00-2.45685316E-03 7.04828410E-07-7.69945201E-11 2

-4.61816034E+07-1.22174073E+04-2.63500676E+02 8.93626220E+00 3.19633877E-03 3

-1.92490909E-05 1.21479962E-08-4.55402311E+07 7.54578538E+02 4

(B2O3)300 021221B 600O 900 G 100.0 3000.0 800.0 1

2.24522067E+03 3.83376540E+00-2.46508843E-03 7.07191383E-07-7.72522700E-11 2

-4.63371018E+07-1.22585070E+04-2.64399146E+02 8.96670522E+00 3.20533528E-03 3

-1.93114625E-05 1.21877565E-08-4.56935885E+07 7.57019633E+02 4

(B2O3)301 021221B 602O 903 G 100.0 3000.0 800.0 1

2.25288262E+03 3.84628028E+00-2.47319070E-03 7.09532847E-07-7.75097690E-11 2

-4.64926493E+07-1.23004004E+04-2.65269784E+02 8.99685077E+00 3.21542610E-03 3

-1.93751605E-05 1.22280182E-08-4.58469497E+07 7.59358501E+02 4

(B2O3)302 021221B 604O 906 G 100.0 3000.0 800.0 1

2.26032599E+03 3.85911407E+00-2.48143154E-03 7.11891928E-07-7.77670781E-11 2

-4.66481405E+07-1.23411395E+04-2.66029001E+02 9.02562795E+00 3.22885382E-03 3

-1.94421581E-05 1.22694860E-08-4.60003111E+07 7.61326079E+02 4

(B2O3)303 021221B 606O 909 G 100.0 3000.0 800.0 1

2.26797182E+03 3.87130063E+00-2.48918999E-03 7.14106108E-07-7.80083609E-11 2

-4.68036578E+07-1.23828032E+04-2.66994237E+02 9.05703704E+00 3.23468130E-03 3

-1.95014231E-05 1.23083449E-08-4.61536765E+07 7.63987103E+02 4

(B2O3)304 021221B 608O 912 G 100.0 3000.0 800.0 1

2.27523108E+03 3.88457123E+00-2.49771275E-03 7.16541091E-07-7.82730800E-11 2

-4.69590977E+07-1.24225427E+04-2.67897525E+02 9.08786168E+00 3.24053448E-03 3

-1.95576841E-05 1.23446305E-08-4.63070420E+07 7.66442230E+02 4

(B2O3)305 021221B 610O 915 G 100.0 3000.0 800.0 1

2.28284483E+03 3.89725305E+00-2.50596067E-03 7.18924998E-07-7.85346046E-11 2

-4.71146570E+07-1.24642775E+04-2.68761818E+02 9.11695287E+00 3.25602345E-03 3

-1.96304349E-05 1.23898473E-08-4.64604077E+07 7.68822566E+02 4

(B2O3)306 021221B 612O 918 G 100.0 3000.0 800.0 1

2.29046265E+03 3.90980849E+00-2.51403517E-03 7.21243883E-07-7.87886338E-11 2

-4.72701914E+07-1.25059037E+04-2.69650311E+02 9.14749277E+00 3.26459942E-03 3

-1.96921059E-05 1.24292057E-08-4.66137772E+07 7.71206658E+02 4

(B2O3)307 021221B 614O 921 G 100.0 3000.0 800.0 1

2.29812993E+03 3.92219803E+00-2.52198016E-03 7.23520985E-07-7.90374328E-11 2

-4.74257472E+07-1.25477885E+04-2.70523014E+02 9.17751261E+00 3.27518777E-03 3

-1.97567633E-05 1.24700820E-08-4.67671468E+07 7.73585652E+02 4

(B2O3)308 021221B 616O 924 G 100.0 3000.0 800.0 1

2.30558235E+03 3.93491962E+00-2.53013908E-03 7.25858443E-07-7.92926825E-11 2

-4.75812402E+07-1.25885208E+04-2.71433188E+02 9.20850896E+00 3.28055566E-03 3

-1.98130081E-05 1.25066427E-08-4.69205202E+07 7.76033819E+02 4

(B2O3)309 021221B 618O 927 G 100.0 3000.0 800.0 1

2.31305088E+03 3.94768024E+00-2.53835272E-03 7.28208824E-07-7.95483203E-11 2

-4.77367269E+07-1.26293183E+04-2.72375754E+02 9.23948609E+00 3.28780498E-03 3

-1.98734977E-05 1.25457319E-08-4.70738900E+07 7.78635589E+02 4

(B2O3)310 021221B 620O 930 G 100.0 3000.0 800.0 1

2.32059822E+03 3.96042771E+00-2.54664462E-03 7.30613678E-07-7.98134214E-11 2

-4.78922594E+07-1.26705936E+04-2.73196750E+02 9.26913796E+00 3.29913407E-03 3

-1.99387049E-05 1.25867382E-08-4.72272672E+07 7.80810173E+02 4

(B2O3)311 021221B 622O 933 G 100.0 3000.0 800.0 1

2.32816053E+03 3.97292026E+00-2.55457561E-03 7.32864944E-07-8.00575131E-11 2

-4.80477827E+07-1.27119191E+04-2.74012459E+02 9.29853104E+00 3.31113557E-03 3

-2.00044964E-05 1.26278483E-08-4.73806407E+07 7.82967572E+02 4

(B2O3)312 021221B 624O 936 G 100.0 3000.0 800.0 1

2.33548223E+03 3.98601370E+00-2.56300006E-03 7.35280114E-07-8.03210733E-11 2

-4.82032555E+07-1.27520099E+04-2.74926092E+02 9.32909709E+00 3.31889845E-03 3

-2.00648180E-05 1.26666926E-08-4.75340178E+07 7.85471097E+02 4

(B2O3)313 021221B 626O 939 G 100.0 3000.0 800.0 1

2.34308006E+03 3.99865305E+00-2.57120174E-03 7.37647175E-07-8.05803471E-11 2

-4.83588054E+07-1.27935793E+04-2.75927536E+02 9.36026427E+00 3.32664911E-03 3

-2.01266876E-05 1.27066108E-08-4.76873949E+07 7.88306461E+02 4

(B2O3)314 021221B 628O 942 G 100.0 3000.0 800.0 1

2.35082767E+03 4.01075854E+00-2.57889725E-03 7.39838264E-07-8.08189807E-11 2

-4.85143822E+07-1.28358520E+04-2.76814301E+02 9.39060064E+00 3.33602976E-03 3

-2.01897373E-05 1.27467145E-08-4.78407757E+07 7.90705477E+02 4

(B2O3)315 021221B 630O 945 G 100.0 3000.0 800.0 1

2.35829031E+03 4.02359692E+00-2.58715007E-03 7.42201567E-07-8.10766738E-11 2

-4.86698930E+07-1.28766791E+04-2.77649154E+02 9.42020376E+00 3.34773887E-03 3

-2.02557930E-05 1.27883039E-08-4.79941564E+07 7.92935979E+02 4

(B2O3)316 021221B 632O 948 G 100.0 3000.0 800.0 1

2.36578855E+03 4.03622864E+00-2.59524879E-03 7.44522149E-07-8.13303094E-11 2

-4.88254102E+07-1.29176607E+04-2.78445521E+02 9.44943406E+00 3.36018134E-03 3

-2.03224940E-05 1.28300630E-08-4.81475407E+07 7.95026099E+02 4

(B2O3)317 021221B 634O 951 G 100.0 3000.0 800.0 1

2.37313921E+03 4.04925786E+00-2.60365713E-03 7.46941820E-07-8.15950640E-11 2

-4.89808919E+07-1.29578690E+04-2.79359104E+02 9.48040332E+00 3.36558006E-03 3

-2.03784521E-05 1.28663342E-08-4.83009248E+07 7.97512652E+02 4

(B2O3)318 021221B 636O 954 G 100.0 3000.0 800.0 1

2.38073672E+03 4.06203197E+00-2.61203694E-03 7.49384431E-07-8.18648397E-11 2

-4.91364476E+07-1.29994471E+04-2.80271418E+02 9.51096639E+00 3.37502506E-03 3

-2.04423061E-05 1.29071158E-08-4.84543087E+07 7.99995356E+02 4

(B2O3)319 021221B 638O 957 G 100.0 3000.0 800.0 1

2.38839503E+03 4.07429436E+00-2.61981146E-03 7.51588999E-07-8.21038315E-11 2

-4.92920008E+07-1.30412143E+04-2.81176947E+02 9.54167003E+00 3.38282441E-03 3

-2.05030251E-05 1.29460868E-08-4.86076963E+07 8.02461237E+02 4

(B2O3)320 021221B 640O 960 G 100.0 3000.0 800.0 1

2.39587449E+03 4.08704157E+00-2.62797247E-03 7.53918382E-07-8.23571858E-11 2

-4.94475197E+07-1.30820959E+04-2.82089923E+02 9.57249868E+00 3.38943297E-03 3

-2.05612623E-05 1.29836383E-08-4.87610835E+07 8.04953856E+02 4

(B2O3)321 021221B 642O 963 G 100.0 3000.0 800.0 1

2.40328176E+03 4.09989444E+00-2.63623051E-03 7.56283232E-07-8.26149002E-11 2

-4.96030067E+07-1.31225863E+04-2.82936874E+02 9.60239883E+00 3.39980106E-03 3

-2.06254001E-05 1.30242620E-08-4.89144705E+07 8.07205160E+02 4

(B2O3)322 021221B 644O 966 G 100.0 3000.0 800.0 1

2.41079310E+03 4.11256113E+00-2.64432790E-03 7.58593202E-07-8.28662500E-11 2

-4.97585265E+07-1.31635915E+04-2.83875708E+02 9.63348686E+00 3.40649954E-03 3

-2.06850103E-05 1.30629435E-08-4.90678610E+07 8.09795295E+02 4

(B2O3)323 021221B 646O 969 G 100.0 3000.0 800.0 1

2.41834531E+03 4.12522095E+00-2.65250791E-03 7.60955708E-07-8.31259878E-11 2

-4.99140829E+07-1.32049273E+04-2.84697307E+02 9.66306364E+00 3.41749490E-03 3

-2.07490615E-05 1.31031423E-08-4.92212551E+07 8.11957099E+02 4

(B2O3)324 021221B 648O 972 G 100.0 3000.0 800.0 1

2.42585595E+03 4.13816616E+00-2.66094802E-03 7.63398141E-07-8.33942794E-11 2

-5.00696239E+07-1.32460463E+04-2.85596206E+02 9.69353454E+00 3.42653766E-03 3

-2.08114428E-05 1.31428879E-08-4.93746449E+07 8.14403352E+02 4

(B2O3)325 021221B 650O 975 G 100.0 3000.0 800.0 1

2.43333464E+03 4.15077858E+00-2.66901018E-03 7.65702971E-07-8.36453552E-11 2

-5.02251480E+07-1.32869210E+04-2.86408460E+02 9.72286045E+00 3.43856664E-03 3

-2.08775584E-05 1.31843680E-08-4.95280421E+07 8.16554257E+02 4

(B2O3)326 021221B 652O 978 G 100.0 3000.0 800.0 1

2.44087333E+03 4.16360094E+00-2.67735053E-03 7.68112853E-07-8.39096859E-11 2

-5.03806993E+07-1.33281877E+04-2.87292500E+02 9.75317319E+00 3.44776167E-03 3

-2.09397528E-05 1.32238624E-08-4.96814349E+07 8.18941196E+02 4

(B2O3)327 021221B 654O 981 G 100.0 3000.0 800.0 1

2.44841758E+03 4.17600018E+00-2.68513866E-03 7.70305710E-07-8.41466285E-11 2

-5.05362268E+07-1.33693056E+04-2.88223463E+02 9.78438910E+00 3.45316382E-03 3

-2.09969513E-05 1.32611949E-08-4.98348352E+07 8.21491494E+02 4

(B2O3)328 021221B 656O 984 G 100.0 3000.0 800.0 1

2.45588599E+03 4.18877161E+00-2.69338479E-03 7.72678447E-07-8.44061165E-11 2

-5.06917391E+07-1.34101055E+04-2.89160112E+02 9.81535801E+00 3.46050593E-03 3

-2.10578264E-05 1.33006168E-08-4.99882310E+07 8.24060860E+02 4

(B2O3)329 021221B 658O 987 G 100.0 3000.0 800.0 1

2.46355276E+03 4.20127894E+00-2.70147335E-03 7.75011512E-07-8.46622686E-11 2

-5.08473333E+07-1.34520237E+04-2.90026606E+02 9.84568849E+00 3.46917306E-03 3

-2.11187534E-05 1.33392773E-08-5.01416343E+07 8.26375165E+02 4

(B2O3)330 021221B 660O 990 G 100.0 3000.0 800.0 1

2.47104300E+03 4.21395116E+00-2.70962076E-03 7.77348696E-07-8.49172812E-11 2

-5.10028875E+07-1.34930765E+04-2.90825538E+02 9.87383774E+00 3.48674394E-03 3

-2.11934501E-05 1.33851385E-08-5.02950330E+07 8.28545623E+02 4

(B2O3)331 021221B 662O 993 G 100.0 3000.0 800.0 1

2.47854367E+03 4.22679058E+00-2.71787098E-03 7.79707989E-07-8.51741306E-11 2

-5.11584253E+07-1.35340978E+04-2.91714118E+02 9.90425802E+00 3.49589534E-03 3

-2.12560317E-05 1.34250118E-08-5.04484352E+07 8.30943947E+02 4

(B2O3)332 021221B 664O 996 G 100.0 3000.0 800.0 1

2.48606314E+03 4.23952233E+00-2.72612360E-03 7.82091519E-07-8.54360623E-11 2

-5.13139759E+07-1.35751992E+04-2.92596478E+02 9.93478702E+00 3.50363152E-03 3

-2.13159770E-05 1.34634303E-08-5.06018408E+07 8.33327833E+02 4

(B2O3)333 021221B 666O 999 G 100.0 3000.0 800.0 1

2.49368109E+03 4.25194217E+00-2.73404271E-03 7.84348591E-07-8.56815693E-11 2

-5.14695311E+07-1.36167700E+04-2.93521386E+02 9.96551848E+00 3.51225552E-03 3

-2.13787544E-05 1.35037210E-08-5.07552417E+07 8.35867965E+02 4

(B2O3)334 021221B 668O 1002 G 100.0 3000.0 800.0 1

2.50125239E+03 4.26460806E+00-2.74224570E-03 7.86717929E-07-8.59419193E-11 2

-5.16251068E+07-1.36581905E+04-2.94385591E+02 9.99575223E+00 3.52101753E-03 3

-2.14398555E-05 1.35425732E-08-5.09086501E+07 8.38179636E+02 4

(B2O3)335 021221B 670O 1005 G 100.0 3000.0 800.0 1

2.50867299E+03 4.27742257E+00-2.75045508E-03 7.89062484E-07-8.61965655E-11 2

-5.17806226E+07-1.36987677E+04-2.95213039E+02 1.00252631E+01 3.53283460E-03 3

-2.15059763E-05 1.35841356E-08-5.10620577E+07 8.40374526E+02 4

(B2O3)336 021221B 672O 1008 G 100.0 3000.0 800.0 1

2.51628936E+03 4.28983310E+00-2.75839879E-03 7.91335018E-07-8.64446378E-11 2

-5.19361876E+07-1.37403351E+04-2.96133997E+02 1.00561028E+01 3.54035394E-03 3

-2.15666035E-05 1.36231998E-08-5.12154647E+07 8.42893676E+02 4

(B2O3)337 021221B 674O 1011 G 100.0 3000.0 800.0 1

2.52375403E+03 4.30270524E+00-2.76668685E-03 7.93711284E-07-8.67040764E-11 2

-5.20917303E+07-1.37811783E+04-2.96979013E+02 1.00858616E+01 3.55152010E-03 3

-2.16318258E-05 1.36643469E-08-5.13688751E+07 8.45159557E+02 4

(B2O3)338 021221B 676O 1014 G 100.0 3000.0 800.0 1

2.53120569E+03 4.31530557E+00-2.77470337E-03 7.95997485E-07-8.69532063E-11 2

-5.22472507E+07-1.38218585E+04-2.97890538E+02 1.01168097E+01 3.55712498E-03 3

-2.16886725E-05 1.37013129E-08-5.15222846E+07 8.47628240E+02 4

(B2O3)339 021221B 678O 1017 G 100.0 3000.0 800.0 1

2.53867001E+03 4.32825579E+00-2.78311523E-03 7.98421522E-07-8.72183468E-11 2

-5.24027885E+07-1.38626852E+04-2.98765341E+02 1.01470395E+01 3.56699948E-03 3

-2.17523591E-05 1.37417235E-08-5.16756975E+07 8.49987574E+02 4

(B2O3)340 021221B 680O 1020 G 100.0 3000.0 800.0 1

2.54625701E+03 4.34081176E+00-2.79123973E-03 8.00766471E-07-8.74756980E-11 2

-5.25583643E+07-1.39041483E+04-2.99688347E+02 1.01779225E+01 3.57385655E-03 3

-2.18114816E-05 1.37798734E-08-5.18291096E+07 8.52512476E+02 4

(B2O3)341 021221B 682O 1023 G 100.0 3000.0 800.0 1

2.55387577E+03 4.35324938E+00-2.79917161E-03 8.03027988E-07-8.77218877E-11 2

-5.27139397E+07-1.39457420E+04-3.00544961E+02 1.02079056E+01 3.58464413E-03 3

-2.18767205E-05 1.38211769E-08-5.19825250E+07 8.54812151E+02 4

(B2O3)342 021221B 684O 1026 G 100.0 3000.0 800.0 1

2.56138850E+03 4.36595643E+00-2.80736565E-03 8.05389079E-07-8.79808562E-11 2

-5.28694874E+07-1.39867641E+04-3.01483823E+02 1.02390833E+01 3.59103151E-03 3

-2.19359758E-05 1.38597131E-08-5.21359436E+07 8.57386203E+02 4

(B2O3)343 021221B 686O 1029 G 100.0 3000.0 800.0 1

2.56882198E+03 4.37894869E+00-2.81577501E-03 8.07806129E-07-8.82446825E-11 2

-5.30250374E+07-1.40275109E+04-3.02250013E+02 1.02679400E+01 3.60410788E-03 3

-2.20019773E-05 1.39004346E-08-5.22893573E+07 8.59364001E+02 4

(B2O3)344 021221B 688O 1032 G 100.0 3000.0 800.0 1

2.57636270E+03 4.39168295E+00-2.82397903E-03 8.10160276E-07-8.85018590E-11 2

-5.31806079E+07-1.40687311E+04-3.03139202E+02 1.02984093E+01 3.61278477E-03 3

-2.20636835E-05 1.39398183E-08-5.24427783E+07 8.61778260E+02 4

(B2O3)345 021221B 690O 1035 G 100.0 3000.0 800.0 1

2.58400276E+03 4.40404388E+00-2.83188910E-03 8.12425445E-07-8.87495966E-11 2

-5.33362001E+07-1.41104429E+04-3.04080898E+02 1.03296632E+01 3.61820294E-03 3

-2.21208466E-05 1.39770819E-08-5.25961984E+07 8.64354108E+02 4

(B2O3)346 021221B 692O 1038 G 100.0 3000.0 800.0 1

2.59151488E+03 4.41658746E+00-2.83989644E-03 8.14707559E-07-8.89974600E-11 2

-5.34917519E+07-1.41514948E+04-3.04879463E+02 1.03582859E+01 3.63444997E-03 3

-2.21945750E-05 1.40228349E-08-5.27496175E+07 8.66493065E+02 4

(B2O3)347 021221B 694O 1041 G 100.0 3000.0 800.0 1

2.59882552E+03 4.42988760E+00-2.84858404E-03 8.17225904E-07-8.92739085E-11 2

-5.36472668E+07-1.41915441E+04-3.05761013E+02 1.03887649E+01 3.64221918E-03 3

-2.22541362E-05 1.40608922E-08-5.29030399E+07 8.68865655E+02 4

(B2O3)348 021221B 696O 1044 G 100.0 3000.0 800.0 1

2.60664628E+03 4.44178909E+00-2.85607623E-03 8.19347537E-07-8.95047615E-11 2

-5.38029077E+07-1.42342014E+04-3.06608004E+02 1.04185436E+01 3.65351215E-03 3

-2.23197390E-05 1.41022101E-08-5.30564613E+07 8.71139574E+02 4

(B2O3)349 021221B 698O 1047 G 100.0 3000.0 800.0 1

2.61416187E+03 4.45456903E+00-2.86435744E-03 8.21734952E-07-8.97662807E-11 2

-5.39584684E+07-1.42752846E+04-3.07541724E+02 1.04496584E+01 3.65998079E-03 3

-2.23786722E-05 1.41403707E-08-5.32098858E+07 8.73679950E+02 4

(B2O3)350 021221B 700O 1050 G 100.0 3000.0 800.0 1

2.62163414E+03 4.46748568E+00-2.87274437E-03 8.24155578E-07-9.00315448E-11 2

-5.41140339E+07-1.43161771E+04-3.08396807E+02 1.04796142E+01 3.67042941E-03 3

-2.24429332E-05 1.41810777E-08-5.33633135E+07 8.75978650E+02 4

(B2O3)351 021221B 702O 1053 G 100.0 3000.0 800.0 1

2.62907880E+03 4.48015319E+00-2.88080189E-03 8.26446250E-07-9.02800773E-11 2

-5.42695714E+07-1.43568234E+04-3.09305010E+02 1.05105477E+01 3.67600438E-03 3

-2.24993698E-05 1.42176545E-08-5.35167401E+07 8.78444617E+02 4

(B2O3)352 021221B 704O 1056 G 100.0 3000.0 800.0 1

2.63671782E+03 4.49257475E+00-2.88872675E-03 8.28700815E-07-9.05247440E-11 2

-5.44251614E+07-1.43985466E+04-3.10144051E+02 1.05401800E+01 3.68845250E-03 3

-2.25671229E-05 1.42601702E-08-5.36701657E+07 8.80675246E+02 4

(B2O3)353 021221B 706O 1059 G 100.0 3000.0 800.0 1

2.64417713E+03 4.50547791E+00-2.89709479E-03 8.31121158E-07-9.07910185E-11 2

-5.45807235E+07-1.44393515E+04-3.11077646E+02 1.05712593E+01 3.69439219E-03 3

-2.26246883E-05 1.42975205E-08-5.38235943E+07 8.83240015E+02 4

(B2O3)354 021221B 708O 1062 G 100.0 3000.0 800.0 1

2.65169517E+03 4.51812327E+00-2.90526700E-03 8.33474522E-07-9.10486883E-11 2

-5.47362985E+07-1.44804572E+04-3.12035053E+02 1.06021706E+01 3.70169883E-03 3

-2.26849662E-05 1.43363827E-08-5.39770261E+07 8.85906667E+02 4

(B2O3)355 021221B 710O 1065 G 100.0 3000.0 800.0 1

2.65920839E+03 4.53088836E+00-2.91346584E-03 8.35827995E-07-9.13061738E-11 2

-5.48918698E+07-1.45215253E+04-3.12985468E+02 1.06334204E+01 3.70758840E-03 3

-2.27429061E-05 1.43740390E-08-5.41304567E+07 8.88526269E+02 4

(B2O3)356 021221B 712O 1068 G 100.0 3000.0 800.0 1

2.66676614E+03 4.54337516E+00-2.92143907E-03 8.38096191E-07-9.15520543E-11 2

-5.50474519E+07-1.45628184E+04-3.13786959E+02 1.06625518E+01 3.72083299E-03 3

-2.28110823E-05 1.44165951E-08-5.42838904E+07 8.90645678E+02 4

(B2O3)357 021221B 714O 1071 G 100.0 3000.0 800.0 1

2.67432622E+03 4.55603216E+00-2.92967974E-03 8.40494042E-07-9.18173057E-11 2

-5.52030595E+07-1.46042395E+04-3.14576640E+02 1.06912504E+01 3.73554377E-03 3

-2.28808528E-05 1.44597326E-08-5.44373229E+07 8.92734007E+02 4

(B2O3)358 021221B 716O 1074 G 100.0 3000.0 800.0 1

2.68168435E+03 4.56897832E+00-2.93796370E-03 8.42850706E-07-9.20723946E-11 2

-5.53585696E+07-1.46444059E+04-3.15535123E+02 1.07225747E+01 3.74163040E-03 3

-2.29400950E-05 1.44984315E-08-5.45907585E+07 8.95383875E+02 4

(B2O3)359 021221B 718O 1077 G 100.0 3000.0 800.0 1

2.68938661E+03 4.58127457E+00-2.94581078E-03 8.45094196E-07-9.23177763E-11 2

-5.55142002E+07-1.46864814E+04-3.16443248E+02 1.07533316E+01 3.74886878E-03 3

-2.29993756E-05 1.45364855E-08-5.47441928E+07 8.97847693E+02 4

(B2O3)360 021221B 720O 1080 G 100.0 3000.0 800.0 1

2.69683902E+03 4.59416353E+00-2.95412731E-03 8.47479696E-07-9.25776328E-11 2

-5.56697546E+07-1.47272169E+04-3.17330714E+02 1.07838015E+01 3.75754411E-03 3

-2.30612001E-05 1.45759617E-08-5.48976301E+07 9.00248497E+02 4

(B2O3)361 021221B 722O 1083 G 100.0 3000.0 800.0 1

2.70435735E+03 4.60693460E+00-2.96240881E-03 8.49873187E-07-9.28405765E-11 2

-5.58253463E+07-1.47683704E+04-3.18198011E+02 1.08136520E+01 3.76843884E-03 3

-2.31260541E-05 1.46169097E-08-5.50510661E+07 9.02606653E+02 4

(B2O3)362 021221B 724O 1086 G 100.0 3000.0 800.0 1

2.71191669E+03 4.61949181E+00-2.97041276E-03 8.52152675E-07-9.30883234E-11 2

-5.59809319E+07-1.48096751E+04-3.19072300E+02 1.08438895E+01 3.77792634E-03 3

-2.31890952E-05 1.46570403E-08-5.52045052E+07 9.04949260E+02 4

(B2O3)363 021221B 726O 1089 G 100.0 3000.0 800.0 1

2.71956961E+03 4.63177684E+00-2.97826178E-03 8.54390691E-07-9.33316741E-11 2

-5.61365456E+07-1.48514505E+04-3.19904534E+02 1.08733998E+01 3.79015970E-03 3

-2.32561611E-05 1.46991208E-08-5.53579472E+07 9.07181101E+02 4

(B2O3)364 021221B 728O 1092 G 100.0 3000.0 800.0 1

2.72690536E+03 4.64486704E+00-2.98668598E-03 8.56810739E-07-9.35965840E-11 2

-5.62920737E+07-1.48915643E+04-3.20821249E+02 1.09044572E+01 3.79584434E-03 3

-2.33132525E-05 1.47362555E-08-5.55113879E+07 9.09670091E+02 4

(B2O3)365 021221B 730O 1095 G 100.0 3000.0 800.0 1

2.73454710E+03 4.65745894E+00-2.99496407E-03 8.59227959E-07-9.38638561E-11 2

-5.64476980E+07-1.49333446E+04-3.21714517E+02 1.09349620E+01 3.80467819E-03 3

-2.33755642E-05 1.47760135E-08-5.56648315E+07 9.12085458E+02 4

(B2O3)366 021221B 732O 1098 G 100.0 3000.0 800.0 1

2.74207943E+03 4.66992177E+00-3.00279143E-03 8.61428837E-07-9.41009856E-11 2

-5.66032733E+07-1.49744616E+04-3.22570879E+02 1.09650099E+01 3.81412445E-03 3

-2.34378096E-05 1.48154784E-08-5.58182737E+07 9.14381351E+02 4

(B2O3)367 021221B 734O 1101 G 100.0 3000.0 800.0 1

2.74965592E+03 4.68258752E+00-3.01098540E-03 8.63789330E-07-9.43595354E-11 2

-5.67588848E+07-1.50159104E+04-3.23403982E+02 1.09946372E+01 3.82593139E-03 3

-2.35041121E-05 1.48572004E-08-5.59717189E+07 9.16597501E+02 4

(B2O3)368 021221B 736O 1104 G 100.0 3000.0 800.0 1

2.75698900E+03 4.69578005E+00-3.01960231E-03 8.66291663E-07-9.46348535E-11 2

-5.69144356E+07-1.50561073E+04-3.24408363E+02 1.10261189E+01 3.83063380E-03 3

-2.35598058E-05 1.48934928E-08-5.61251626E+07 9.19427412E+02 4

(B2O3)369 021221B 738O 1107 G 100.0 3000.0 800.0 1

2.76439624E+03 4.70855955E+00-3.02773749E-03 8.68600856E-07-9.48847797E-11 2

-5.70699657E+07-1.50965196E+04-3.25369377E+02 1.10574994E+01 3.83659468E-03 3

-2.36190937E-05 1.49323142E-08-5.62786093E+07 9.22073649E+02 4

(B2O3)370 021221B 740O 1110 G 100.0 3000.0 800.0 1

2.77213847E+03 4.72074954E+00-3.03548675E-03 8.70811904E-07-9.51265633E-11 2

-5.72256257E+07-1.51388089E+04-3.26196190E+02 1.10871476E+01 3.84776326E-03 3

-2.36837612E-05 1.49729340E-08-5.64320588E+07 9.24274581E+02 4

(B2O3)371 021221B 742O 1113 G 100.0 3000.0 800.0 1

2.77970794E+03 4.73321522E+00-3.04347729E-03 8.73093588E-07-9.53746016E-11 2

-5.73812168E+07-1.51801484E+04-3.27001289E+02 1.11165346E+01 3.85991657E-03 3

-2.37502000E-05 1.50145081E-08-5.65855069E+07 9.26378500E+02 4

(B2O3)372 021221B 744O 1116 G 100.0 3000.0 800.0 1

2.78717222E+03 4.74632863E+00-3.05212936E-03 8.75623867E-07-9.56543929E-11 2

-5.75368186E+07-1.52210467E+04-3.27933395E+02 1.11475821E+01 3.86598985E-03 3

-2.38075187E-05 1.50515028E-08-5.67389578E+07 9.28944731E+02 4

(B2O3)373 021221B 746O 1119 G 100.0 3000.0 800.0 1

2.79481821E+03 4.75876106E+00-3.06002899E-03 8.77866332E-07-9.58976188E-11 2

-5.76924354E+07-1.52627958E+04-3.28846774E+02 1.11783032E+01 3.87453215E-03 3

-2.38698926E-05 1.50915163E-08-5.68924071E+07 9.31424834E+02 4

(B2O3)374 021221B 748O 1122 G 100.0 3000.0 800.0 1

2.80229317E+03 4.77138511E+00-3.06810549E-03 8.80184391E-07-9.61516360E-11 2

-5.78480100E+07-1.53036079E+04-3.29749810E+02 1.12091222E+01 3.88071735E-03 3

-2.39275130E-05 1.51288185E-08-5.70458594E+07 9.33880430E+02 4

(B2O3)375 021221B 750O 1125 G 100.0 3000.0 800.0 1

2.80976246E+03 4.78436399E+00-3.07655497E-03 8.82624612E-07-9.64189546E-11 2

-5.80035981E+07-1.53444799E+04-3.30606026E+02 1.12391708E+01 3.89090556E-03 3

-2.39912055E-05 1.51690824E-08-5.71993145E+07 9.36177695E+02 4

(B2O3)376 021221B 752O 1128 G 100.0 3000.0 800.0 1

2.81746545E+03 4.79640586E+00-3.08415312E-03 8.84772701E-07-9.66515244E-11 2

-5.81592135E+07-1.53864220E+04-3.31514507E+02 1.12699270E+01 3.89912180E-03 3

-2.40536735E-05 1.52093826E-08-5.73527679E+07 9.38645076E+02 4

(B2O3)377 021221B 754O 1131 G 100.0 3000.0 800.0 1

2.82482228E+03 4.80938043E+00-3.09248526E-03 8.87158805E-07-9.69115854E-11 2

-5.83147809E+07-1.54267446E+04-3.32503412E+02 1.13010348E+01 3.90517623E-03 3

-2.41115179E-05 1.52468904E-08-5.75062242E+07 9.41412095E+02 4

(B2O3)378 021221B 756O 1134 G 100.0 3000.0 800.0 1

2.83238218E+03 4.82210793E+00-3.10069197E-03 8.89516106E-07-9.71692139E-11 2

-5.84704017E+07-1.54681522E+04-3.33245080E+02 1.13291512E+01 3.92293784E-03 3

-2.41863398E-05 1.52927423E-08-5.76596788E+07 9.43326471E+02 4

(B2O3)379 021221B 758O 1137 G 100.0 3000.0 800.0 1

2.83986979E+03 4.83472468E+00-3.10882408E-03 8.91861088E-07-9.74266130E-11 2

-5.86259820E+07-1.55090398E+04-3.34122335E+02 1.13595434E+01 3.93103390E-03 3

-2.42469874E-05 1.53315736E-08-5.78131362E+07 9.45689545E+02 4

(B2O3)380 021221B 760O 1140 G 100.0 3000.0 800.0 1

2.84726734E+03 4.84783231E+00-3.11734182E-03 8.94317928E-07-9.76958274E-11 2

-5.87815618E+07-1.55495318E+04-3.35030668E+02 1.13905494E+01 3.93662809E-03 3

-2.43033060E-05 1.53680440E-08-5.79665965E+07 9.48153436E+02 4

(B2O3)381 021221B 762O 1143 G 100.0 3000.0 800.0 1

2.85508891E+03 4.85993161E+00-3.12511148E-03 8.96547536E-07-9.79399701E-11 2

-5.89372463E+07-1.55922351E+04-3.35913464E+02 1.14208096E+01 3.94670611E-03 3

-2.43675067E-05 1.54087312E-08-5.81200550E+07 9.50541520E+02 4

(B2O3)382 021221B 764O 1146 G 100.0 3000.0 800.0 1

2.86252143E+03 4.87267121E+00-3.13328738E-03 8.98884937E-07-9.81940588E-11 2

-5.90928100E+07-1.56328240E+04-3.36849325E+02 1.14513359E+01 3.95634040E-03 3

-2.44324297E-05 1.54504151E-08-5.82735163E+07 9.53148146E+02 4

(B2O3)383 021221B 766O 1149 G 100.0 3000.0 800.0 1

2.87000176E+03 4.88553808E+00-3.14160300E-03 9.01284979E-07-9.84576006E-11 2

-5.92484096E+07-1.56737625E+04-3.37766676E+02 1.14822491E+01 3.96260421E-03 3

-2.44898852E-05 1.54874459E-08-5.84269757E+07 9.55638631E+02 4

(B2O3)384 021221B 768O 1152 G 100.0 3000.0 800.0 1

2.87764112E+03 4.89783864E+00-3.14939799E-03 9.03490926E-07-9.86962081E-11 2

-5.94040312E+07-1.57154425E+04-3.38604957E+02 1.15120355E+01 3.97384391E-03 3

-2.45555673E-05 1.55288710E-08-5.85804379E+07 9.57868566E+02 4

(B2O3)385 021221B 770O 1155 G 100.0 3000.0 800.0 1

2.88502435E+03 4.91085490E+00-3.15779072E-03 9.05904011E-07-9.89604158E-11 2

-5.95596057E+07-1.57558477E+04-3.39450635E+02 1.15420992E+01 3.98287721E-03 3

-2.46169128E-05 1.55678713E-08-5.87339030E+07 9.60116903E+02 4

(B2O3)386 021221B 772O 1158 G 100.0 3000.0 800.0 1

2.89266452E+03 4.92353798E+00-3.16609820E-03 9.08319742E-07-9.92266419E-11 2

-5.97152619E+07-1.57976598E+04-3.40317727E+02 1.15722171E+01 3.99276128E-03 3

-2.46798184E-05 1.56075496E-08-5.88873661E+07 9.62461260E+02 4

(B2O3)387 021221B 774O 1161 G 100.0 3000.0 800.0 1

2.90010206E+03 4.93610906E+00-3.17401388E-03 9.10552502E-07-9.94677208E-11 2

-5.98708135E+07-1.58382011E+04-3.41285464E+02 1.16038144E+01 3.99729456E-03 3

-2.47366295E-05 1.56450221E-08-5.90408320E+07 9.65116303E+02 4

(B2O3)388 021221B 776O 1164 G 100.0 3000.0 800.0 1

2.90760173E+03 4.94897171E+00-3.18233611E-03 9.12952730E-07-9.97312543E-11 2

-6.00264385E+07-1.58793026E+04-3.42059509E+02 1.16325404E+01 4.01172978E-03 3

-2.48057692E-05 1.56878415E-08-5.91942959E+07 9.67146083E+02 4

(B2O3)389 021221B 778O 1167 G 100.0 3000.0 800.0 1

2.91523656E+03 4.96128036E+00-3.19020338E-03 9.15196640E-07-9.99748915E-11 2

-6.01820616E+07-1.59209259E+04-3.42936388E+02 1.16629897E+01 4.02024751E-03 3

-2.48672859E-05 1.57270465E-08-5.93477673E+07 9.69506739E+02 4

(B2O3)390 021221B 780O 1170 G 100.0 3000.0 800.0 1

2.92269267E+03 4.97428840E+00-3.19871263E-03 9.17670380E-07-1.00247590E-10 2

-6.03376573E+07-1.59617417E+04-3.43881735E+02 1.16941015E+01 4.02694405E-03 3

-2.49267308E-05 1.57655655E-08-5.95012320E+07 9.72097742E+02 4

(B2O3)391 021221B 782O 1173 G 100.0 3000.0 800.0 1

2.93034067E+03 4.98676959E+00-3.20670422E-03 9.19956301E-07-1.00497063E-10 2

-6.04933072E+07-1.60035291E+04-3.44678839E+02 1.17233611E+01 4.04027779E-03 3

-2.49952538E-05 1.58083539E-08-5.96547041E+07 9.74193480E+02 4

(B2O3)392 021221B 784O 1176 G 100.0 3000.0 800.0 1

2.93800811E+03 4.99884623E+00-3.21433172E-03 9.22120434E-07-1.00732470E-10 2

-6.06489464E+07-1.60453179E+04-3.45626543E+02 1.17546902E+01 4.04472632E-03 3

-2.50505235E-05 1.58444727E-08-5.98081742E+07 9.76806616E+02 4

(B2O3)393 021221B 786O 1179 G 100.0 3000.0 800.0 1

2.94514513E+03 5.01245759E+00-3.22318811E-03 9.24668228E-07-1.01010008E-10 2

-6.08044607E+07-1.60844528E+04-3.46446787E+02 1.17839837E+01 4.05755639E-03 3

-2.51183002E-05 1.58870134E-08-5.99616470E+07 9.78994979E+02 4

(B2O3)394 021221B 788O 1182 G 100.0 3000.0 800.0 1

2.95279244E+03 5.02498288E+00-3.23129325E-03 9.27004492E-07-1.01265791E-10 2

-6.09601064E+07-1.61262403E+04-3.47347514E+02 1.18146244E+01 4.06594998E-03 3

-2.51798684E-05 1.59263466E-08-6.01151178E+07 9.81428380E+02 4

(B2O3)395 021221B 790O 1185 G 100.0 3000.0 800.0 1

2.96026524E+03 5.03753873E+00-3.23923905E-03 9.29256878E-07-1.01510195E-10 2

-6.11156887E+07-1.61669987E+04-3.48245635E+02 1.18453602E+01 4.07298837E-03 3

-2.52393803E-05 1.59648238E-08-6.02685912E+07 9.83863499E+02 4

(B2O3)396 021221B 792O 1188 G 100.0 3000.0 800.0 1

2.96776084E+03 5.05037604E+00-3.24759860E-03 9.31687253E-07-1.01778540E-10 2

-6.12713063E+07-1.62079839E+04-3.49174073E+02 1.18765448E+01 4.07839810E-03 3

-2.52961684E-05 1.60017959E-08-6.04220673E+07 9.86398769E+02 4

(B2O3)397 021221B 794O 1191 G 100.0 3000.0 800.0 1

2.97549824E+03 5.06251779E+00-3.25533220E-03 9.33888460E-07-1.02017942E-10 2

-6.14269842E+07-1.62502572E+04-3.50138914E+02 1.19071689E+01 4.08791885E-03 3

-2.53604221E-05 1.60428127E-08-6.05755412E+07 9.89106357E+02 4

(B2O3)398 021221B 796O 1194 G 100.0 3000.0 800.0 1

2.98295307E+03 5.07527738E+00-3.26351955E-03 9.36227645E-07-1.02272448E-10 2

-6.15825903E+07-1.62910399E+04-3.50893975E+02 1.19357785E+01 4.10237667E-03 3

-2.54295786E-05 1.60856312E-08-6.07290178E+07 9.91068421E+02 4

(B2O3)399 021221B 798O 1197 G 100.0 3000.0 800.0 1

2.99047327E+03 5.08805168E+00-3.27173701E-03 9.38586686E-07-1.02530153E-10 2

-6.17382035E+07-1.63321666E+04-3.51756165E+02 1.19658814E+01 4.11258855E-03 3

-2.54935901E-05 1.61261607E-08-6.08824923E+07 9.93365031E+02 4

(B2O3)400 021221B 800O 1200 G 100.0 3000.0 800.0 1

2.99803615E+03 5.10055638E+00-3.27977459E-03 9.40899813E-07-1.02783970E-10 2

-6.18938275E+07-1.63734273E+04-3.52703105E+02 1.19972067E+01 4.11795243E-03 3

-2.55510563E-05 1.61637084E-08-6.10359742E+07 9.95975811E+02 4

(B2O3)401 021221B 802O 1203 G 100.0 3000.0 800.0 1

3.00552566E+03 5.11331931E+00-3.28798639E-03 9.43253783E-07-1.03040940E-10 2

-6.20494383E+07-1.64143690E+04-3.53566356E+02 1.20274555E+01 4.12690557E-03 3

-2.56128808E-05 1.62030945E-08-6.11894538E+07 9.98281179E+02 4

(B2O3)402 021221B 804O 1206 G 100.0 3000.0 800.0 1

3.01305834E+03 5.12605320E+00-3.29623673E-03 9.45631106E-07-1.03301284E-10 2

-6.22050709E+07-1.64555738E+04-3.54445210E+02 1.20578860E+01 4.13479929E-03 3

-2.56725989E-05 1.62412007E-08-6.13429313E+07 1.00064976E+03 4

(B2O3)403 021221B 806O 1209 G 100.0 3000.0 800.0 1

3.02066158E+03 5.13842414E+00-3.30408758E-03 9.47858325E-07-1.03542701E-10 2

-6.23606963E+07-1.64970313E+04-3.55385348E+02 1.20890376E+01 4.14127781E-03 3

-2.57319756E-05 1.62797514E-08-6.14964113E+07 1.00323289E+03 4

(B2O3)404 021221B 808O 1212 G 100.0 3000.0 800.0 1

3.02824803E+03 5.15115672E+00-3.31237008E-03 9.50253822E-07-1.03805617E-10 2

-6.25163459E+07-1.65385313E+04-3.56271324E+02 1.21194834E+01 4.15011313E-03 3

-2.57937451E-05 1.63190368E-08-6.16498940E+07 1.00562059E+03 4

(B2O3)405 021221B 810O 1215 G 100.0 3000.0 800.0 1

3.03570506E+03 5.16401496E+00-3.32065758E-03 9.52639584E-07-1.04067299E-10 2

-6.26719555E+07-1.65793113E+04-3.57099614E+02 1.21492816E+01 4.16062546E-03 3

-2.58576496E-05 1.63594051E-08-6.18033792E+07 1.00780983E+03 4

(B2O3)406 021221B 812O 1218 G 100.0 3000.0 800.0 1

3.04324749E+03 5.17651117E+00-3.32863933E-03 9.54918035E-07-1.04315438E-10 2

-6.28275889E+07-1.66205650E+04-3.57991163E+02 1.21797270E+01 4.16821256E-03 3

-2.59169852E-05 1.63973819E-08-6.19568621E+07 1.01019387E+03 4

(B2O3)407 021221B 814O 1221 G 100.0 3000.0 800.0 1

3.05074175E+03 5.18943040E+00-3.33705594E-03 9.57351698E-07-1.04582177E-10 2

-6.29832028E+07-1.66615395E+04-3.58908186E+02 1.22105288E+01 4.17669157E-03 3

-2.59795935E-05 1.64376266E-08-6.21103476E+07 1.01268499E+03 4

(B2O3)408 021221B 816O 1224 G 100.0 3000.0 800.0 1

3.05813365E+03 5.20228595E+00-3.34530565E-03 9.59710241E-07-1.04838962E-10 2

-6.31388062E+07-1.67020344E+04-3.59788099E+02 1.22400859E+01 4.18854496E-03 3

-2.60458554E-05 1.64793091E-08-6.22638307E+07 1.01510641E+03 4

(B2O3)409 021221B 818O 1227 G 100.0 3000.0 800.0 1

3.06582791E+03 5.21470825E+00-3.35329776E-03 9.62010628E-07-1.05091535E-10 2

-6.32944838E+07-1.67440696E+04-3.60693633E+02 1.22708128E+01 4.19663472E-03 3

-2.61070546E-05 1.65185474E-08-6.24173164E+07 1.01756096E+03 4

(B2O3)410 021221B 820O 1230 G 100.0 3000.0 800.0 1

3.07341125E+03 5.22706903E+00-3.36108201E-03 9.64208647E-07-1.05329334E-10 2

-6.34501267E+07-1.67854833E+04-3.61474609E+02 1.22995421E+01 4.21143867E-03 3

-2.61774285E-05 1.65621814E-08-6.25708046E+07 1.01962957E+03 4

(B2O3)411 021221B 822O 1233 G 100.0 3000.0 800.0 1

3.08071866E+03 5.24025668E+00-3.36968915E-03 9.66701732E-07-1.05602936E-10 2

-6.36056988E+07-1.68254618E+04-3.62337647E+02 1.23297639E+01 4.22049716E-03 3

-2.62398216E-05 1.66020904E-08-6.27242953E+07 1.02194613E+03 4

(B2O3)412 021221B 824O 1236 G 100.0 3000.0 800.0 1

3.08836766E+03 5.25279897E+00-3.37779425E-03 9.69029965E-07-1.05857099E-10 2

-6.37613641E+07-1.68672819E+04-3.63216577E+02 1.23598018E+01 4.23189988E-03 3

-2.63063398E-05 1.66440626E-08-6.28777836E+07 1.02431887E+03 4

(B2O3)413 021221B 826O 1239 G 100.0 3000.0 800.0 1

3.09598253E+03 5.26521903E+00-3.38572641E-03 9.71297998E-07-1.06104895E-10 2

-6.39170142E+07-1.69088388E+04-3.64138407E+02 1.23910626E+01 4.23678879E-03 3

-2.63621022E-05 1.66803630E-08-6.30312744E+07 1.02681241E+03 4

(B2O3)414 021221B 828O 1242 G 100.0 3000.0 800.0 1

3.10352932E+03 5.27785472E+00-3.39382078E-03 9.73607081E-07-1.06355886E-10 2

-6.40726466E+07-1.69500686E+04-3.65020982E+02 1.24212928E+01 4.24664129E-03 3

-2.64258410E-05 1.67208452E-08-6.31847627E+07 1.02921219E+03 4

(B2O3)415 021221B 830O 1245 G 100.0 3000.0 800.0 1

3.11106702E+03 5.29039365E+00-3.40186651E-03 9.75916044E-07-1.06608192E-10 2

-6.42282821E+07-1.69912177E+04-3.65890848E+02 1.24518297E+01 4.25376881E-03 3

-2.64845745E-05 1.67585618E-08-6.33382586E+07 1.03154057E+03 4

(B2O3)416 021221B 832O 1248 G 100.0 3000.0 800.0 1

3.11855037E+03 5.30322410E+00-3.41017141E-03 9.78305823E-07-1.06869501E-10 2

-6.43839005E+07-1.70321049E+04-3.66837548E+02 1.24830221E+01 4.26027022E-03 3

-2.65440083E-05 1.67971631E-08-6.34917519E+07 1.03414903E+03 4

(B2O3)417 021221B 834O 1251 G 100.0 3000.0 800.0 1

3.12601043E+03 5.31590726E+00-3.41828094E-03 9.80627591E-07-1.07123259E-10 2

-6.45395040E+07-1.70728507E+04-3.67713829E+02 1.25134891E+01 4.26813313E-03 3

-2.66043025E-05 1.68358405E-08-6.36452427E+07 1.03649001E+03 4

(B2O3)418 021221B 836O 1254 G 100.0 3000.0 800.0 1

3.13362907E+03 5.32849825E+00-3.42640539E-03 9.82961435E-07-1.07378349E-10 2

-6.46951746E+07-1.71145225E+04-3.68546463E+02 1.25430802E+01 4.28015340E-03 3

-2.66707086E-05 1.68774639E-08-6.37987359E+07 1.03870854E+03 4

(B2O3)419 021221B 838O 1257 G 100.0 3000.0 800.0 1

3.14113226E+03 5.34125497E+00-3.43470478E-03 9.85376394E-07-1.07645593E-10 2

-6.48508264E+07-1.71556089E+04-3.69357462E+02 1.25724153E+01 4.29178521E-03 3

-2.67356120E-05 1.69181208E-08-6.39522316E+07 1.04085705E+03 4

(B2O3)420 021221B 840O 1260 G 100.0 3000.0 800.0 1

3.14862127E+03 5.35390200E+00-3.44272561E-03 9.87637963E-07-1.07888718E-10 2

-6.50064339E+07-1.71964694E+04-3.70227839E+02 1.26027924E+01 4.30079199E-03 3

-2.67980969E-05 1.69579847E-08-6.41057297E+07 1.04318591E+03 4

(B2O3)421 021221B 842O 1263 G 100.0 3000.0 800.0 1

3.15602319E+03 5.36692729E+00-3.45119797E-03 9.90087401E-07-1.08157296E-10 2

-6.51620446E+07-1.72369362E+04-3.71160795E+02 1.26339933E+01 4.30630307E-03 3

-2.68552198E-05 1.69951820E-08-6.42592304E+07 1.04574991E+03 4

(B2O3)422 021221B 844O 1266 G 100.0 3000.0 800.0 1

3.16383131E+03 5.37893302E+00-3.45884579E-03 9.92273115E-07-1.08396347E-10 2

-6.53177508E+07-1.72795051E+04-3.72073496E+02 1.26646918E+01 4.31498144E-03 3

-2.69179958E-05 1.70354173E-08-6.44127283E+07 1.04823998E+03 4

(B2O3)423 021221B 846O 1269 G 100.0 3000.0 800.0 1

3.17121585E+03 5.39190173E+00-3.46720332E-03 9.94671148E-07-1.08657992E-10 2

-6.54733485E+07-1.73198961E+04-3.72949558E+02 1.26952371E+01 4.32221417E-03 3

-2.69768587E-05 1.70732102E-08-6.45662236E+07 1.05057617E+03 4

(B2O3)424 021221B 848O 1272 G 100.0 3000.0 800.0 1

3.17892538E+03 5.40411818E+00-3.47498965E-03 9.96888278E-07-1.08899115E-10 2

-6.56290323E+07-1.73619358E+04-3.73867815E+02 1.27260343E+01 4.33036782E-03 3

-2.70388471E-05 1.71130931E-08-6.47197265E+07 1.05309339E+03 4

(B2O3)425 021221B 850O 1275 G 100.0 3000.0 800.0 1

3.18641780E+03 5.41689185E+00-3.48322701E-03 9.99250268E-07-1.09156498E-10 2

-6.57846656E+07-1.74029212E+04-3.74658501E+02 1.27550548E+01 4.34432254E-03 3

-2.71080802E-05 1.71561449E-08-6.48732266E+07 1.05516253E+03 4

(B2O3)426 021221B 852O 1278 G 100.0 3000.0 800.0 1

3.19387377E+03 5.42975268E+00-3.49156196E-03 1.00166900E-06-1.09423717E-10 2

-6.59403120E+07-1.74437508E+04-3.75523104E+02 1.27850858E+01 4.35346905E-03 3

-2.71695667E-05 1.71952228E-08-6.50267292E+07 1.05750010E+03 4

(B2O3)427 021221B 854O 1281 G 100.0 3000.0 800.0 1

3.20157483E+03 5.44203517E+00-3.49943720E-03 1.00391963E-06-1.09668717E-10 2

-6.60959929E+07-1.74857504E+04-3.76431650E+02 1.28158433E+01 4.36178915E-03 3

-2.72316996E-05 1.72350874E-08-6.51802341E+07 1.05997075E+03 4

(B2O3)428 021221B 856O 1284 G 100.0 3000.0 800.0 1

3.20900075E+03 5.45493623E+00-3.50777139E-03 1.00631553E-06-1.09930629E-10 2

-6.62516000E+07-1.75263247E+04-3.77357744E+02 1.28468433E+01 4.36867502E-03 3

-2.72914928E-05 1.72738218E-08-6.53337363E+07 1.06249719E+03 4

(B2O3)429 021221B 858O 1287 G 100.0 3000.0 800.0 1

3.21632265E+03 5.46808615E+00-3.51625011E-03 1.00874687E-06-1.10195779E-10 2

-6.64072048E+07-1.75664520E+04-3.78115598E+02 1.28755337E+01 4.38252055E-03 3

-2.73592255E-05 1.73157536E-08-6.54872409E+07 1.06445754E+03 4

(B2O3)430 021221B 860O 1290 G 100.0 3000.0 800.0 1

3.22385887E+03 5.48064566E+00-3.52424163E-03 1.01102604E-06-1.10444386E-10 2

-6.65628481E+07-1.76076073E+04-3.79077849E+02 1.29070693E+01 4.38661069E-03 3

-2.74141124E-05 1.73517704E-08-6.56407426E+07 1.06710696E+03 4

(B2O3)431 021221B 862O 1293 G 100.0 3000.0 800.0 1

3.23163644E+03 5.49280012E+00-3.53203620E-03 1.01325835E-06-1.10688016E-10 2

-6.67185620E+07-1.76500464E+04-3.79846811E+02 1.29357627E+01 4.40282428E-03 3

-2.74875253E-05 1.73971335E-08-6.57942520E+07 1.06912428E+03 4

(B2O3)432 021221B 864O 1296 G 100.0 3000.0 800.0 1

3.23885560E+03 5.50622924E+00-3.54078671E-03 1.01578625E-06-1.10964688E-10 2

-6.68741327E+07-1.76895926E+04-3.80782701E+02 1.29671803E+01 4.40639368E-03 3

-2.75406534E-05 1.74319531E-08-6.59477585E+07 1.07166308E+03 4

(B2O3)433 021221B 866O 1299 G 100.0 3000.0 800.0 1

3.24657543E+03 5.51837907E+00-3.54849828E-03 1.01797677E-06-1.11202513E-10 2

-6.70298340E+07-1.77317377E+04-3.81618316E+02 1.29964429E+01 4.42038671E-03 3

-2.76109357E-05 1.74758567E-08-6.61012673E+07 1.07392065E+03 4

(B2O3)434 021221B 868O 1302 G 100.0 3000.0 800.0 1

3.25401962E+03 5.53121847E+00-3.55679673E-03 1.02037034E-06-1.11465378E-10 2

-6.71854589E+07-1.77724300E+04-3.82594040E+02 1.30280807E+01 4.42439606E-03 3

-2.76661468E-05 1.75122095E-08-6.62547732E+07 1.07661674E+03 4

(B2O3)435 021221B 870O 1305 G 100.0 3000.0 800.0 1

3.26140334E+03 5.54427236E+00-3.56527017E-03 1.02281714E-06-1.11733685E-10 2

-6.73410871E+07-1.78128776E+04-3.83586255E+02 1.30594122E+01 4.42987632E-03 3

-2.77233294E-05 1.75494259E-08-6.64082815E+07 1.07941005E+03 4

(B2O3)436 021221B 872O 1308 G 100.0 3000.0 800.0 1

3.26908756E+03 5.55666045E+00-3.57322049E-03 1.02509314E-06-1.11982140E-10 2

-6.74967786E+07-1.78548355E+04-3.84487321E+02 1.30900568E+01 4.43840819E-03 3

-2.77853471E-05 1.75890941E-08-6.65617922E+07 1.08184727E+03 4

(B2O3)437 021221B 874O 1311 G 100.0 3000.0 800.0 1

3.27661192E+03 5.56931745E+00-3.58131854E-03 1.02740561E-06-1.12233752E-10 2

-6.76524208E+07-1.78959067E+04-3.85400064E+02 1.31209401E+01 4.44581126E-03 3

-2.78458839E-05 1.76281839E-08-6.67153051E+07 1.08433120E+03 4

(B2O3)438 021221B 876O 1314 G 100.0 3000.0 800.0 1

3.28413908E+03 5.58182163E+00-3.58932913E-03 1.02970154E-06-1.12484724E-10 2

-6.78080871E+07-1.79370811E+04-3.86331074E+02 1.31516421E+01 4.45214496E-03 3

-2.79029758E-05 1.76648618E-08-6.68688151E+07 1.08690193E+03 4

(B2O3)439 021221B 878O 1317 G 100.0 3000.0 800.0 1

3.29162981E+03 5.59470862E+00-3.59768136E-03 1.03210561E-06-1.12747653E-10 2

-6.79637441E+07-1.79780796E+04-3.87062102E+02 1.31798452E+01 4.46950827E-03 3

-2.79774101E-05 1.77106246E-08-6.70223327E+07 1.08878153E+03 4

(B2O3)440 021221B 880O 1320 G 100.0 3000.0 800.0 1

3.29925921E+03 5.60718893E+00-3.60572334E-03 1.03442603E-06-1.13002753E-10 2

-6.81194240E+07-1.80197570E+04-3.88027362E+02 1.32111718E+01 4.47554826E-03 3

-2.80361228E-05 1.77488318E-08-6.71758420E+07 1.09145064E+03 4

(B2O3)441 021221B 882O 1323 G 100.0 3000.0 800.0 1

3.30690460E+03 5.61954001E+00-3.61358962E-03 1.03665935E-06-1.13244638E-10 2

-6.82751027E+07-1.80614722E+04-3.88865291E+02 1.32410559E+01 4.48628562E-03 3

-2.81007248E-05 1.77895330E-08-6.73293589E+07 1.09367752E+03 4

(B2O3)442 021221B 884O 1326 G 100.0 3000.0 800.0 1

3.31445312E+03 5.63227988E+00-3.62191508E-03 1.03908380E-06-1.13512643E-10 2

-6.84307915E+07-1.81028725E+04-3.89758597E+02 1.32709237E+01 4.49738570E-03 3

-2.81660153E-05 1.78307133E-08-6.74828728E+07 1.09610150E+03 4

(B2O3)443 021221B 886O 1329 G 100.0 3000.0 800.0 1

3.32201503E+03 5.64472910E+00-3.62985672E-03 1.04134712E-06-1.13758594E-10 2

-6.85864463E+07-1.81441195E+04-3.90702229E+02 1.33022577E+01 4.50240699E-03 3

-2.82226371E-05 1.78677002E-08-6.76363889E+07 1.09869185E+03 4

(B2O3)444 021221B 888O 1332 G 100.0 3000.0 800.0 1

3.32970806E+03 5.65697462E+00-3.63761200E-03 1.04355033E-06-1.13998385E-10 2

-6.87421422E+07-1.81860880E+04-3.91560419E+02 1.33324804E+01 4.51194131E-03 3

-2.82856966E-05 1.79077890E-08-6.77899073E+07 1.10097893E+03 4

(B2O3)445 021221B 890O 1335 G 100.0 3000.0 800.0 1

3.33691675E+03 5.67045846E+00-3.64636120E-03 1.04606046E-06-1.14271334E-10 2

-6.88977171E+07-1.82255739E+04-3.92511973E+02 1.33639295E+01 4.51625329E-03 3

-2.83407075E-05 1.79438434E-08-6.79434226E+07 1.10358640E+03 4

(B2O3)446 021221B 892O 1338 G 100.0 3000.0 800.0 1

3.34440113E+03 5.68327843E+00-3.65466911E-03 1.04846133E-06-1.14535077E-10 2

-6.90533734E+07-1.82665270E+04-3.93353265E+02 1.33935347E+01 4.52788630E-03 3

-2.84063914E-05 1.79850707E-08-6.80969402E+07 1.10584899E+03 4

(B2O3)447 021221B 894O 1341 G 100.0 3000.0 800.0 1

3.35178773E+03 5.69617925E+00-3.66295803E-03 1.05083177E-06-1.14792833E-10 2

-6.92089859E+07-1.83068768E+04-3.94156557E+02 1.34232081E+01 4.53832062E-03 3

-2.84699206E-05 1.80251683E-08-6.82504601E+07 1.10795040E+03 4

(B2O3)448 021221B 896O 1344 G 100.0 3000.0 800.0 1

3.35957314E+03 5.70822748E+00-3.67065479E-03 1.05303984E-06-1.15035131E-10 2

-6.93647109E+07-1.83493319E+04-3.95113510E+02 1.34546340E+01 4.54406756E-03 3

-2.85285570E-05 1.80634724E-08-6.84039821E+07 1.11056745E+03 4

(B2O3)449 021221B 898O 1347 G 100.0 3000.0 800.0 1

3.36705758E+03 5.72105792E+00-3.67897289E-03 1.05543864E-06-1.15297945E-10 2

-6.95203746E+07-1.83903107E+04-3.95925360E+02 1.34838431E+01 4.55693850E-03 3

-2.85958040E-05 1.81054240E-08-6.85575010E+07 1.11272622E+03 4

(B2O3)450 021221B 900O 1350 G 100.0 3000.0 800.0 1

3.37469084E+03 5.73348421E+00-3.68697215E-03 1.05773971E-06-1.15550081E-10 2

-6.96760606E+07-1.84319665E+04-3.96846911E+02 1.35147727E+01 4.56411362E-03 3

-2.86559218E-05 1.81442321E-08-6.87110222E+07 1.11525062E+03 4

(B2O3)451 021221B 902O 1353 G 100.0 3000.0 800.0 1

3.38218634E+03 5.74618512E+00-3.69509547E-03 1.06005871E-06-1.15802708E-10 2

-6.98317155E+07-1.84729242E+04-3.97695713E+02 1.35449769E+01 4.57264953E-03 3

-2.87165461E-05 1.81828142E-08-6.88645455E+07 1.11750347E+03 4

(B2O3)452 021221B 904O 1356 G 100.0 3000.0 800.0 1

3.38979728E+03 5.75863070E+00-3.70308936E-03 1.06235356E-06-1.16053822E-10 2

-6.99873952E+07-1.85144510E+04-3.98572736E+02 1.35754135E+01 4.58146335E-03 3

-2.87788716E-05 1.82226604E-08-6.90180711E+07 1.11986661E+03 4

(B2O3)453 021221B 906O 1359 G 100.0 3000.0 800.0 1

3.39694417E+03 5.77216383E+00-3.71184717E-03 1.06486386E-06-1.16326562E-10 2

-7.01429568E+07-1.85536070E+04-3.99433744E+02 1.36055438E+01 4.59042325E-03 3

-2.88403473E-05 1.82618204E-08-6.91715935E+07 1.12217535E+03 4

(B2O3)454 021221B 908O 1362 G 100.0 3000.0 800.0 1

3.40474532E+03 5.78411585E+00-3.71937955E-03 1.06699427E-06-1.16557653E-10 2

-7.02986880E+07-1.85961271E+04-4.00357338E+02 1.36365029E+01 4.59764316E-03 3

-2.89006838E-05 1.83008000E-08-6.93251180E+07 1.12469615E+03 4

(B2O3)455 021221B 910O 1365 G 100.0 3000.0 800.0 1

3.41203277E+03 5.79738284E+00-3.72799598E-03 1.06947924E-06-1.16829606E-10 2

-7.04542984E+07-1.86360391E+04-4.01210820E+02 1.36667484E+01 4.60561588E-03 3

-2.89600035E-05 1.83385775E-08-6.94786448E+07 1.12696354E+03 4

(B2O3)456 021221B 912O 1368 G 100.0 3000.0 800.0 1

3.41961158E+03 5.81007244E+00-3.73625356E-03 1.07187142E-06-1.17092655E-10 2

-7.06099800E+07-1.86774364E+04-4.02117383E+02 1.36974665E+01 4.61403331E-03 3

-2.90221548E-05 1.83784434E-08-6.96321737E+07 1.12943506E+03 4

(B2O3)457 021221B 914O 1371 G 100.0 3000.0 800.0 1

3.42716845E+03 5.82266931E+00-3.74431821E-03 1.07417656E-06-1.17344040E-10 2

-7.07656504E+07-1.87187019E+04-4.03023986E+02 1.37282814E+01 4.62126815E-03 3

-2.90818845E-05 1.84169109E-08-6.97856993E+07 1.13189680E+03 4

(B2O3)458 021221B 916O 1374 G 100.0 3000.0 800.0 1

3.43476692E+03 5.83507336E+00-3.75230313E-03 1.07647694E-06-1.17596443E-10 2

-7.09213416E+07-1.87602258E+04-4.03928130E+02 1.37580841E+01 4.63380360E-03 3

-2.91510247E-05 1.84606726E-08-6.99392271E+07 1.13440955E+03 4

(B2O3)459 021221B 918O 1377 G 100.0 3000.0 800.0 1

3.44246783E+03 5.84730030E+00-3.76008855E-03 1.07869148E-06-1.17837093E-10 2

-7.10770685E+07-1.88022968E+04-4.04721527E+02 1.37874217E+01 4.64541335E-03 3

-2.92156979E-05 1.85010555E-08-7.00927571E+07 1.13648041E+03 4

(B2O3)460 021221B 920O 1380 G 100.0 3000.0 800.0 1

3.44987839E+03 5.86023357E+00-3.76840890E-03 1.08107524E-06-1.18096759E-10 2

-7.12327024E+07-1.88428285E+04-4.05617842E+02 1.38179311E+01 4.65378663E-03 3

-2.92770479E-05 1.85403312E-08-7.02462836E+07 1.13890290E+03 4

(B2O3)461 021221B 922O 1383 G 100.0 3000.0 800.0 1

3.45758218E+03 5.87255095E+00-3.77630822E-03 1.08333931E-06-1.18344522E-10 2

-7.13884267E+07-1.88848959E+04-4.06451654E+02 1.38474315E+01 4.66691086E-03 3

-2.93460840E-05 1.85836425E-08-7.03998180E+07 1.14114018E+03 4

(B2O3)462 021221B 924O 1386 G 100.0 3000.0 800.0 1

3.46499645E+03 5.88549709E+00-3.78468360E-03 1.08574917E-06-1.18607889E-10 2

-7.15440685E+07-1.89254313E+04-4.07316494E+02 1.38779122E+01 4.67428598E-03 3

-2.94049101E-05 1.86212795E-08-7.05533489E+07 1.14344957E+03 4

(B2O3)463 021221B 926O 1389 G 100.0 3000.0 800.0 1

3.47259556E+03 5.89803718E+00-3.79276430E-03 1.08807225E-06-1.18862055E-10 2

-7.16997588E+07-1.89669170E+04-4.08232717E+02 1.39087636E+01 4.68188230E-03 3

-2.94657458E-05 1.86605035E-08-7.07068819E+07 1.14595635E+03 4

(B2O3)464 021221B 928O 1392 G 100.0 3000.0 800.0 1

3.47981287E+03 5.91133326E+00-3.80132931E-03 1.09052705E-06-1.19129538E-10 2

-7.18553420E+07-1.90064237E+04-4.09164066E+02 1.39398387E+01 4.68749188E-03 3

-2.95228434E-05 1.86976983E-08-7.08604115E+07 1.14848868E+03 4

(B2O3)465 021221B 930O 1395 G 100.0 3000.0 800.0 1

3.48743348E+03 5.92383931E+00-3.80938566E-03 1.09284390E-06-1.19383375E-10 2

-7.20110423E+07-1.90480523E+04-4.10021490E+02 1.39699325E+01 4.69741973E-03 3

-2.95863096E-05 1.87379203E-08-7.10139431E+07 1.15078965E+03 4

(B2O3)466 021221B 932O 1398 G 100.0 3000.0 800.0 1

3.49495380E+03 5.93655893E+00-3.81760872E-03 1.09521583E-06-1.19643790E-10 2

-7.21667206E+07-1.90891477E+04-4.10838220E+02 1.39997544E+01 4.70767640E-03 3

-2.96497757E-05 1.87780340E-08-7.11674826E+07 1.15293086E+03 4

(B2O3)467 021221B 934O 1401 G 100.0 3000.0 800.0 1

3.50261957E+03 5.94903472E+00-3.82567733E-03 1.09754348E-06-1.19899306E-10 2

-7.23224321E+07-1.91310316E+04-4.11759680E+02 1.40304017E+01 4.71678622E-03 3

-2.97132170E-05 1.88186221E-08-7.13210129E+07 1.15545718E+03 4

(B2O3)468 021221B 936O 1404 G 100.0 3000.0 800.0 1

3.51016414E+03 5.96150534E+00-3.83360169E-03 1.09979545E-06-1.20143837E-10 2

-7.24781119E+07-1.91721964E+04-4.12661144E+02 1.40613335E+01 4.72222745E-03 3

-2.97692284E-05 1.88548862E-08-7.14745510E+07 1.15790998E+03 4

(B2O3)469 021221B 938O 1407 G 100.0 3000.0 800.0 1

3.51780896E+03 5.97387279E+00-3.84152991E-03 1.10206746E-06-1.20392108E-10 2

-7.26338139E+07-1.92139373E+04-4.13507863E+02 1.40913396E+01 4.73243789E-03 3

-2.98332559E-05 1.88954515E-08-7.16280855E+07 1.16015221E+03 4

(B2O3)470 021221B 940O 1410 G 100.0 3000.0 800.0 1

3.52521860E+03 5.98680212E+00-3.84982894E-03 1.10442928E-06-1.20647432E-10 2

-7.27894486E+07-1.92544133E+04-4.14433309E+02 1.41223428E+01 4.73925864E-03 3

-2.98927105E-05 1.89338909E-08-7.17816221E+07 1.16268328E+03 4

(B2O3)471 021221B 942O 1413 G 100.0 3000.0 800.0 1

3.53278001E+03 5.99929048E+00-3.85782331E-03 1.10671842E-06-1.20897410E-10 2

-7.29451366E+07-1.92957211E+04-4.15245762E+02 1.41516988E+01 4.75157200E-03 3

-2.99595107E-05 1.89757711E-08-7.19351608E+07 1.16483599E+03 4

(B2O3)472 021221B 944O 1416 G 100.0 3000.0 800.0 1

3.54020723E+03 6.01218894E+00-3.86612608E-03 1.10910707E-06-1.21159476E-10 2

-7.31007973E+07-1.93363381E+04-4.16116189E+02 1.41821649E+01 4.75904157E-03 3

-3.00185993E-05 1.90136574E-08-7.20887017E+07 1.16717006E+03 4

(B2O3)473 021221B 946O 1419 G 100.0 3000.0 800.0 1

3.54796957E+03 6.02438776E+00-3.87394638E-03 1.11135166E-06-1.21405451E-10 2

-7.32565520E+07-1.93787880E+04-4.16908078E+02 1.42107774E+01 4.77565056E-03 3

-3.00926224E-05 1.90594016E-08-7.22422388E+07 1.16926049E+03 4

(B2O3)474 021221B 948O 1422 G 100.0 3000.0 800.0 1

3.55543894E+03 6.03714987E+00-3.88219180E-03 1.11372101E-06-1.21664068E-10 2

-7.34122134E+07-1.94195997E+04-4.17816905E+02 1.42417252E+01 4.78144976E-03 3

-3.01493617E-05 1.90960199E-08-7.23957781E+07 1.17172264E+03 4

(B2O3)475 021221B 950O 1425 G 100.0 3000.0 800.0 1

3.56289803E+03 6.05017848E+00-3.89067982E-03 1.11617323E-06-1.21932676E-10 2

-7.35678813E+07-1.94603932E+04-4.18682965E+02 1.42719174E+01 4.79170010E-03 3

-3.02139537E-05 1.91370802E-08-7.25493194E+07 1.17406244E+03 4

(B2O3)476 021221B 952O 1428 G 100.0 3000.0 800.0 1

3.57029814E+03 6.06306687E+00-3.89896006E-03 1.11854886E-06-1.22192279E-10 2

-7.37235184E+07-1.95008045E+04-4.19642860E+02 1.43036087E+01 4.79536458E-03 3

-3.02686519E-05 1.91731851E-08-7.27028629E+07 1.17668687E+03 4

(B2O3)477 021221B 954O 1431 G 100.0 3000.0 800.0 1

3.57786160E+03 6.07544821E+00-3.90681976E-03 1.12077977E-06-1.22434096E-10 2

-7.38792033E+07-1.95420596E+04-4.20482918E+02 1.43336684E+01 4.80438157E-03 3

-3.03302642E-05 1.92123658E-08-7.28564084E+07 1.17892176E+03 4

(B2O3)478 021221B 956O 1434 G 100.0 3000.0 800.0 1

3.58540532E+03 6.08824953E+00-3.91510062E-03 1.12316311E-06-1.22695114E-10 2

-7.40349118E+07-1.95833638E+04-4.21474911E+02 1.43648803E+01 4.81112215E-03 3

-3.03896114E-05 1.92506780E-08-7.30099501E+07 1.18172562E+03 4

(B2O3)479 021221B 958O 1437 G 100.0 3000.0 800.0 1

3.59303549E+03 6.10069023E+00-3.92308959E-03 1.12544739E-06-1.22943690E-10 2

-7.41906187E+07-1.96250362E+04-4.22273421E+02 1.43942129E+01 4.82399972E-03 3

-3.04574657E-05 1.92930845E-08-7.31634939E+07 1.18380737E+03 4

(B2O3)480 021221B 960O 1440 G 100.0 3000.0 800.0 1

3.60055304E+03 6.11332753E+00-3.93123279E-03 1.12779581E-06-1.23201767E-10 2

-7.43463062E+07-1.96661070E+04-4.23194731E+02 1.44253520E+01 4.82889898E-03 3

-3.05129035E-05 1.93291467E-08-7.33170398E+07 1.18631506E+03 4

(B2O3)481 021221B 962O 1443 G 100.0 3000.0 800.0 1

3.60821415E+03 6.12579706E+00-3.93929504E-03 1.13011699E-06-1.23455930E-10 2

-7.45020339E+07-1.97079920E+04-4.24016466E+02 1.44544337E+01 4.84394877E-03 3

-3.05849966E-05 1.93740623E-08-7.34705818E+07 1.18852365E+03 4

(B2O3)482 021221B 964O 1446 G 100.0 3000.0 800.0 1

3.61551207E+03 6.13889230E+00-3.94771510E-03 1.13253757E-06-1.23721066E-10 2

-7.46576518E+07-1.97479080E+04-4.24908228E+02 1.44852185E+01 4.85012670E-03 3

-3.06424092E-05 1.94112236E-08-7.36241259E+07 1.19090848E+03 4

(B2O3)483 021221B 966O 1449 G 100.0 3000.0 800.0 1

3.62295547E+03 6.15190615E+00-3.95616092E-03 1.13497527E-06-1.23988427E-10 2

-7.48133240E+07-1.97886370E+04-4.25806809E+02 1.45158370E+01 4.85825231E-03 3

-3.07033754E-05 1.94503003E-08-7.37776720E+07 1.19334788E+03 4

(B2O3)484 021221B 968O 1452 G 100.0 3000.0 800.0 1

3.63056432E+03 6.16439294E+00-3.96418138E-03 1.13726814E-06-1.24237669E-10 2

-7.49690228E+07-1.98301462E+04-4.26696039E+02 1.45464419E+01 4.86667541E-03 3

-3.07651992E-05 1.94898642E-08-7.39312202E+07 1.19575431E+03 4

(B2O3)485 021221B 970O 1455 G 100.0 3000.0 800.0 1

3.63826527E+03 6.17656945E+00-3.97194391E-03 1.13948227E-06-1.24479054E-10 2

-7.51247635E+07-1.98721823E+04-4.27654060E+02 1.45774973E+01 4.87346709E-03 3

-3.08248571E-05 1.95284891E-08-7.40847703E+07 1.19841920E+03 4

(B2O3)486 021221B 972O 1458 G 100.0 3000.0 800.0 1

3.64585156E+03 6.18905770E+00-3.97992035E-03 1.14176235E-06-1.24728046E-10 2

-7.52804784E+07-1.99136707E+04-4.28418547E+02 1.46061633E+01 4.88790509E-03 3

-3.08938874E-05 1.95711459E-08-7.42383166E+07 1.20041446E+03 4

(B2O3)487 021221B 974O 1461 G 100.0 3000.0 800.0 1

3.65321820E+03 6.20205151E+00-3.98827354E-03 1.14414685E-06-1.24986447E-10 2

-7.54361162E+07-1.99539006E+04-4.29306077E+02 1.46370558E+01 4.89416839E-03 3

-3.09518175E-05 1.96086360E-08-7.43918708E+07 1.20279256E+03 4

(B2O3)488 021221B 976O 1464 G 100.0 3000.0 800.0 1

3.66089386E+03 6.21441533E+00-3.99623990E-03 1.14644211E-06-1.25238759E-10 2

-7.55918381E+07-1.99957829E+04-4.30245627E+02 1.46682028E+01 4.90118309E-03 3

-3.10123640E-05 1.96478753E-08-7.45454211E+07 1.20536015E+03 4

(B2O3)489 021221B 978O 1467 G 100.0 3000.0 800.0 1

3.66838996E+03 6.22721735E+00-4.00451781E-03 1.14882413E-06-1.25499205E-10 2

-7.57475309E+07-2.00368166E+04-4.31038151E+02 1.46968586E+01 4.91696202E-03 3

-3.10845875E-05 1.96925545E-08-7.46989675E+07 1.20748232E+03 4

(B2O3)490 021221B 980O 1470 G 100.0 3000.0 800.0 1

3.67603367E+03 6.23954539E+00-4.01240723E-03 1.15108355E-06-1.25746196E-10 2

-7.59032575E+07-2.00785437E+04-4.31953965E+02 1.47280195E+01 4.92186353E-03 3

-3.11401053E-05 1.97286574E-08-7.48525217E+07 1.20995129E+03 4

(B2O3)491 021221B 982O 1473 G 100.0 3000.0 800.0 1

3.68350394E+03 6.25242172E+00-4.02075039E-03 1.15349060E-06-1.26009945E-10 2

-7.60589322E+07-2.01193979E+04-4.32771442E+02 1.47572901E+01 4.93577752E-03 3

-3.12103251E-05 1.97726143E-08-7.50060721E+07 1.21212656E+03 4

(B2O3)492 021221B 984O 1476 G 100.0 3000.0 800.0 1

3.69098879E+03 6.26514308E+00-4.02894954E-03 1.15585290E-06-1.26269130E-10 2

-7.62146280E+07-2.01603465E+04-4.33628251E+02 1.47874060E+01 4.94409782E-03 3

-3.12700895E-05 1.98105934E-08-7.51596243E+07 1.21442426E+03 4

(B2O3)493 021221B 986O 1479 G 100.0 3000.0 800.0 1

3.69848822E+03 6.27784230E+00-4.03702789E-03 1.15814402E-06-1.26517292E-10 2

-7.63702977E+07-2.02012753E+04-4.34533033E+02 1.48181526E+01 4.95240558E-03 3

-3.13322740E-05 1.98506057E-08-7.53131786E+07 1.21687403E+03 4

(B2O3)494 021221B 988O 1482 G 100.0 3000.0 800.0 1

3.70623944E+03 6.29001489E+00-4.04487221E-03 1.16039720E-06-1.26763682E-10 2

-7.65260495E+07-2.02435566E+04-4.35423271E+02 1.48487748E+01 4.96074586E-03 3

-3.13940919E-05 1.98902226E-08-7.54667348E+07 1.21927155E+03 4

(B2O3)495 021221B 990O 1485 G 100.0 3000.0 800.0 1

3.71347226E+03 6.30334379E+00-4.05348670E-03 1.16287179E-06-1.27033477E-10 2

-7.66816695E+07-2.02831339E+04-4.36273794E+02 1.48790308E+01 4.96862364E-03 3

-3.14533527E-05 1.99280270E-08-7.56202931E+07 1.22154642E+03 4

(B2O3)496 021221B 992O 1488 G 100.0 3000.0 800.0 1

3.72097480E+03 6.31608940E+00-4.06169512E-03 1.16523354E-06-1.27292576E-10 2

-7.68373730E+07-2.03241946E+04-4.37310995E+02 1.49111494E+01 4.97102674E-03 3

-3.15060660E-05 1.99630424E-08-7.57738472E+07 1.22446393E+03 4

(B2O3)497 021221B 994O 1491 G 100.0 3000.0 800.0 1

3.72864933E+03 6.32840998E+00-4.06956953E-03 1.16747961E-06-1.27536932E-10 2

-7.69930947E+07-2.03660501E+04-4.38227294E+02 1.49418972E+01 4.97984141E-03 3

-3.15694853E-05 2.00037860E-08-7.59274033E+07 1.22696222E+03 4

(B2O3)498 021221B 996O 1494 G 100.0 3000.0 800.0 1

3.73613657E+03 6.34120539E+00-4.07784815E-03 1.16986729E-06-1.27798774E-10 2

-7.71487859E+07-2.04069782E+04-4.39091662E+02 1.49724855E+01 4.98652586E-03 3

-3.16269521E-05 2.00406005E-08-7.60809614E+07 1.22925746E+03 4

(B2O3)499 021221B 998O 1497 G 100.0 3000.0 800.0 1

3.74362323E+03 6.35392343E+00-4.08601026E-03 1.17220326E-06-1.28053557E-10 2

-7.73044764E+07-2.04479427E+04-4.39896208E+02 1.50015903E+01 4.99996211E-03 3

-3.16954631E-05 2.00833937E-08-7.62345153E+07 1.23137862E+03 4

(B2O3)500 021221B 1000O 1500 G 100.0 3000.0 800.0 1

3.75129809E+03 6.36617618E+00-4.09382584E-03 1.17443599E-06-1.28297067E-10 2

-7.74602044E+07-2.04897748E+04-4.40815813E+02 1.50326230E+01 5.00673123E-03 3

-3.17550938E-05 2.01219940E-08-7.63880772E+07 1.23388654E+03 4

(B2O3)501 021221B 1002O 1503 G 100.0 3000.0 800.0 1

3.75870644E+03 6.37908030E+00-4.10212025E-03 1.17680524E-06-1.28554477E-10 2

-7.76158755E+07-2.05302990E+04-4.41621685E+02 1.50620004E+01 5.01846650E-03 3

-3.18204242E-05 2.01629445E-08-7.65416350E+07 1.23601744E+03 4

(B2O3)502 021221B 1004O 1506 G 100.0 3000.0 800.0 1

3.76626357E+03 6.39174907E+00-4.11034829E-03 1.17919650E-06-1.28818846E-10 2

-7.77715843E+07-2.05715834E+04-4.42542622E+02 1.50930010E+01 5.02517091E-03 3

-3.18796647E-05 2.02012820E-08-7.66951947E+07 1.23852750E+03 4

(B2O3)503 021221B 1006O 1509 G 100.0 3000.0 800.0 1

3.77400862E+03 6.40387482E+00-4.11799761E-03 1.18134792E-06-1.29050253E-10 2

-7.79273308E+07-2.06137978E+04-4.43435549E+02 1.51236043E+01 5.03392838E-03 3

-3.19421765E-05 2.02412438E-08-7.68487563E+07 1.24094243E+03 4

(B2O3)504 021221B 1008O 1512 G 100.0 3000.0 800.0 1

3.78131346E+03 6.41698367E+00-4.12647916E-03 1.18379709E-06-1.29319022E-10 2

-7.80829708E+07-2.06537576E+04-4.44328238E+02 1.51543063E+01 5.04034967E-03 3

-3.19998524E-05 2.02784976E-08-7.70023137E+07 1.24335552E+03 4

(B2O3)505 021221B 1010O 1515 G 100.0 3000.0 800.0 1

3.78883341E+03 6.42972083E+00-4.13469947E-03 1.18615287E-06-1.29575763E-10 2

-7.82386885E+07-2.06949337E+04-4.45278566E+02 1.51846149E+01 5.05112417E-03 3

-3.20659382E-05 2.03204735E-08-7.71558792E+07 1.24602052E+03 4

(B2O3)506 021221B 1012O 1518 G 100.0 3000.0 800.0 1

3.79634264E+03 6.44241706E+00-4.14294088E-03 1.18854107E-06-1.29838779E-10 2

-7.83944003E+07-2.07360192E+04-4.46088386E+02 1.52142853E+01 5.06080573E-03 3

-3.21274668E-05 2.03592595E-08-7.73094404E+07 1.24813985E+03 4

(B2O3)507 021221B 1014O 1521 G 100.0 3000.0 800.0 1

3.80385306E+03 6.45504708E+00-4.15098347E-03 1.19083009E-06-1.30087619E-10 2

-7.85500846E+07-2.07770005E+04-4.47021976E+02 1.52453837E+01 5.06754483E-03 3

-3.21872875E-05 2.03980955E-08-7.74630035E+07 1.25069635E+03 4

(B2O3)508 021221B 1016O 1524 G 100.0 3000.0 800.0 1

3.81142891E+03 6.46773336E+00-4.15916550E-03 1.19318020E-06-1.30344477E-10 2

-7.87058061E+07-2.08183861E+04-4.47910636E+02 1.52760414E+01 5.07539585E-03 3

-3.22476471E-05 2.04367391E-08-7.76165686E+07 1.25310404E+03 4

(B2O3)509 021221B 1018O 1527 G 100.0 3000.0 800.0 1

3.81895732E+03 6.48055962E+00-4.16755517E-03 1.19561759E-06-1.30612817E-10 2

-7.88615260E+07-2.08595946E+04-4.48746680E+02 1.53060491E+01 5.08485356E-03 3

-3.23095093E-05 2.04758221E-08-7.77701355E+07 1.25529658E+03 4

(B2O3)510 021221B 1020O 1530 G 100.0 3000.0 800.0 1

3.82649976E+03 6.49300528E+00-4.17543360E-03 1.19784563E-06-1.30853689E-10 2

-7.90172254E+07-2.09007657E+04-4.49692225E+02 1.53365709E+01 5.09439823E-03 3

-3.23739080E-05 2.05170589E-08-7.79236981E+07 1.25795170E+03 4

(B2O3)511 021221B 1022O 1533 G 100.0 3000.0 800.0 1

3.83418736E+03 6.50535021E+00-4.18336374E-03 1.20012614E-06-1.31103980E-10 2

-7.91729823E+07-2.09427751E+04-4.50517142E+02 1.53661260E+01 5.10649413E-03 3

-3.24407657E-05 2.05591096E-08-7.80772626E+07 1.26013672E+03 4

(B2O3)512 021221B 1024O 1536 G 100.0 3000.0 800.0 1

3.84164940E+03 6.51817256E+00-4.19173558E-03 1.20256497E-06-1.31373237E-10 2

-7.93286736E+07-2.09835724E+04-4.51364162E+02 1.53962054E+01 5.11570314E-03 3

-3.25028109E-05 2.05985558E-08-7.82308289E+07 1.26238917E+03 4

(B2O3)513 021221B 1026O 1539 G 100.0 3000.0 800.0 1

3.84918643E+03 6.53096709E+00-4.19997077E-03 1.20491405E-06-1.31628144E-10 2

-7.94843874E+07-2.10247848E+04-4.52235701E+02 1.54264362E+01 5.12567222E-03 3

-3.25666070E-05 2.06390117E-08-7.83843971E+07 1.26473038E+03 4

(B2O3)514 021221B 1028O 1542 G 100.0 3000.0 800.0 1

3.85661066E+03 6.54380434E+00-4.20819579E-03 1.20726627E-06-1.31884371E-10 2

-7.96400616E+07-2.10653337E+04-4.53118221E+02 1.54570344E+01 5.13318918E-03 3

-3.26263917E-05 2.06774207E-08-7.85379672E+07 1.26710806E+03 4

(B2O3)515 021221B 1030O 1545 G 100.0 3000.0 800.0 1

3.86420649E+03 6.55617811E+00-4.21606126E-03 1.20950690E-06-1.32128439E-10 2

-7.97957888E+07-2.11067993E+04-4.54007687E+02 1.54876348E+01 5.14014859E-03 3

-3.26848189E-05 2.07149647E-08-7.86915329E+07 1.26952263E+03 4

(B2O3)516 021221B 1032O 1548 G 100.0 3000.0 800.0 1

3.87161803E+03 6.56933599E+00-4.22468130E-03 1.21200567E-06-1.32402671E-10 2

-7.99514669E+07-2.11473546E+04-4.54945131E+02 1.55187337E+01 5.14726517E-03 3

-3.27451224E-05 2.07539470E-08-7.88451004E+07 1.27208687E+03 4

(B2O3)517 021221B 1034O 1551 G 100.0 3000.0 800.0 1

3.87946932E+03 6.58122518E+00-4.23222966E-03 1.21416353E-06-1.32639086E-10 2

-8.01072579E+07-2.11901116E+04-4.55797363E+02 1.55489896E+01 5.15695029E-03 3

-3.28087791E-05 2.07944278E-08-7.89986761E+07 1.27436436E+03 4

(B2O3)518 021221B 1036O 1554 G 100.0 3000.0 800.0 1

3.88689906E+03 6.59396656E+00-4.24033679E-03 1.21646404E-06-1.32888152E-10 2

-8.02629453E+07-2.12307812E+04-4.56727235E+02 1.55793566E+01 5.16585550E-03 3

-3.28708271E-05 2.08340168E-08-7.91522410E+07 1.27693376E+03 4

(B2O3)519 021221B 1038O 1557 G 100.0 3000.0 800.0 1

3.89419301E+03 6.60709824E+00-4.24879818E-03 1.21888769E-06-1.33152009E-10 2

-8.04185907E+07-2.12706608E+04-4.57567761E+02 1.56094575E+01 5.17464572E-03 3

-3.29319815E-05 2.08729864E-08-7.93058141E+07 1.27916729E+03 4

(B2O3)520 021221B 1040O 1560 G 100.0 3000.0 800.0 1

3.90199061E+03 6.61924623E+00-4.25664236E-03 1.22114678E-06-1.33399655E-10 2

-8.05743839E+07-2.13132308E+04-4.58445944E+02 1.56394214E+01 5.18654743E-03 3

-3.29997600E-05 2.09158172E-08-7.94593891E+07 1.28156196E+03 4

(B2O3)521 021221B 1042O 1563 G 100.0 3000.0 800.0 1

3.90961297E+03 6.63170997E+00-4.26465552E-03 1.22345580E-06-1.33653564E-10 2

-8.07301303E+07-2.13548813E+04-4.59356498E+02 1.56703705E+01 5.19231283E-03 3

-3.30562735E-05 2.09522906E-08-7.96129595E+07 1.28403139E+03 4

(B2O3)522 021221B 1044O 1566 G 100.0 3000.0 800.0 1

3.91703012E+03 6.64454047E+00-4.27283530E-03 1.22577913E-06-1.33905249E-10 2

-8.08858119E+07-2.13954415E+04-4.60129085E+02 1.56991737E+01 5.20670298E-03 3

-3.31259956E-05 2.09956279E-08-7.97665317E+07 1.28604814E+03 4

(B2O3)523 021221B 1046O 1569 G 100.0 3000.0 800.0 1

3.92457132E+03 6.65717136E+00-4.28098654E-03 1.22812307E-06-1.34161535E-10 2

-8.10415204E+07-2.14366129E+04-4.61049992E+02 1.57301394E+01 5.21382916E-03 3

-3.31862436E-05 2.10345899E-08-7.99201058E+07 1.28855245E+03 4

(B2O3)524 021221B 1048O 1572 G 100.0 3000.0 800.0 1

3.93198604E+03 6.67003814E+00-4.28929423E-03 1.23050958E-06-1.34421962E-10 2

-8.11971951E+07-2.14771003E+04-4.61937888E+02 1.57608239E+01 5.22113765E-03 3

-3.32459808E-05 2.10730535E-08-8.00736817E+07 1.29095050E+03 4

(B2O3)525 021221B 1050O 1575 G 100.0 3000.0 800.0 1

3.93969679E+03 6.68232070E+00-4.29716266E-03 1.23277257E-06-1.34670668E-10 2

-8.13529712E+07-2.15192401E+04-4.62793371E+02 1.57908236E+01 5.23100265E-03 3

-3.33088894E-05 2.11128708E-08-8.02272530E+07 1.29324408E+03 4

(B2O3)526 021221B 1052O 1578 G 100.0 3000.0 800.0 1

3.94715208E+03 6.69534259E+00-4.30559917E-03 1.23519685E-06-1.34935317E-10 2

-8.15086707E+07-2.15600026E+04-4.63688430E+02 1.58215308E+01 5.23930183E-03 3

-3.33706135E-05 2.11524871E-08-8.03808325E+07 1.29566100E+03 4

(B2O3)527 021221B 1054O 1581 G 100.0 3000.0 800.0 1

3.95452226E+03 6.70829315E+00-4.31401059E-03 1.23763203E-06-1.35203047E-10 2

-8.16643470E+07-2.16003186E+04-4.64527305E+02 1.58516863E+01 5.24705131E-03 3

-3.34294197E-05 2.11899578E-08-8.05344074E+07 1.29787130E+03 4

(B2O3)528 021221B 1056O 1584 G 100.0 3000.0 800.0 1

3.96207642E+03 6.72102753E+00-4.32227277E-03 1.24001090E-06-1.35462833E-10 2

-8.18200674E+07-2.16415840E+04-4.65449077E+02 1.58824917E+01 5.25547905E-03 3

-3.34918899E-05 2.12300795E-08-8.06879841E+07 1.30039908E+03 4

(B2O3)529 021221B 1058O 1587 G 100.0 3000.0 800.0 1

3.96973344E+03 6.73311187E+00-4.32983661E-03 1.24213937E-06-1.35692898E-10 2

-8.19758000E+07-2.16832712E+04-4.66375735E+02 1.59137366E+01 5.26068775E-03 3

-3.35489064E-05 2.12673570E-08-8.08415626E+07 1.30292822E+03 4

(B2O3)530 021221B 1060O 1590 G 100.0 3000.0 800.0 1

3.97713023E+03 6.74607363E+00-4.33819648E-03 1.24453774E-06-1.35954477E-10 2

-8.21314789E+07-2.17237197E+04-4.67279279E+02 1.59445062E+01 5.26758734E-03 3

-3.36077239E-05 2.13052559E-08-8.09951364E+07 1.30537470E+03 4

(B2O3)531 021221B 1062O 1593 G 100.0 3000.0 800.0 1

3.98479033E+03 6.75854488E+00-4.34625254E-03 1.24686162E-06-1.36209766E-10 2

-8.22872392E+07-2.17655697E+04-4.68107492E+02 1.59744013E+01 5.27805210E-03 3

-3.36715818E-05 2.13454816E-08-8.11487185E+07 1.30754980E+03 4

(B2O3)532 021221B 1064O 1596 G 100.0 3000.0 800.0 1

3.99217407E+03 6.77155485E+00-4.35465895E-03 1.24927546E-06-1.36472979E-10 2

-8.24429279E+07-2.18059951E+04-4.68871255E+02 1.60029402E+01 5.29357194E-03 3

-3.37429913E-05 2.13896741E-08-8.13022959E+07 1.30955471E+03 4

(B2O3)533 021221B 1066O 1599 G 100.0 3000.0 800.0 1

3.99986336E+03 6.78377846E+00-4.36241617E-03 1.25148232E-06-1.36713400E-10 2

-8.25986921E+07-2.18479555E+04-4.69791993E+02 1.60339412E+01 5.29968451E-03 3

-3.38006842E-05 2.14269829E-08-8.14558750E+07 1.31206661E+03 4

(B2O3)534 021221B 1068O 1602 G 100.0 3000.0 800.0 1

4.00732623E+03 6.79662534E+00-4.37078108E-03 1.25390629E-06-1.36979840E-10 2

-8.27543852E+07-2.18887161E+04-4.70679613E+02 1.60645389E+01 5.30819626E-03 3

-3.38631075E-05 2.14671230E-08-8.16094559E+07 1.31445421E+03 4

(B2O3)535 021221B 1070O 1605 G 100.0 3000.0 800.0 1

4.01473678E+03 6.80950765E+00-4.37905404E-03 1.25627243E-06-1.37237463E-10 2

-8.29100794E+07-2.19292374E+04-4.71655415E+02 1.60958301E+01 5.31398246E-03 3

-3.39212166E-05 2.15050117E-08-8.17630386E+07 1.31718136E+03 4

(B2O3)536 021221B 1072O 1608 G 100.0 3000.0 800.0 1

4.02250335E+03 6.82178092E+00-4.38700074E-03 1.25857210E-06-1.37490926E-10 2

-8.30658737E+07-2.19716403E+04-4.72460267E+02 1.61252588E+01 5.32681025E-03 3

-3.39890425E-05 2.15473747E-08-8.19166231E+07 1.31930704E+03 4

(B2O3)537 021221B 1074O 1611 G 100.0 3000.0 800.0 1

4.03001494E+03 6.83449501E+00-4.39521676E-03 1.26093395E-06-1.37748858E-10 2

-8.32215931E+07-2.20126914E+04-4.73388394E+02 1.61563076E+01 5.33276480E-03 3

-3.40465401E-05 2.15845943E-08-8.20702028E+07 1.32184810E+03 4

(B2O3)538 021221B 1076O 1614 G 100.0 3000.0 800.0 1

4.03749367E+03 6.84723799E+00-4.40341849E-03 1.26328877E-06-1.38006345E-10 2

-8.33773072E+07-2.20535893E+04-4.74237785E+02 1.61860928E+01 5.34371571E-03 3

-3.41116832E-05 2.16258300E-08-8.22237842E+07 1.32412859E+03 4

(B2O3)539 021221B 1078O 1617 G 100.0 3000.0 800.0 1

4.04529581E+03 6.85928783E+00-4.41096519E-03 1.26540373E-06-1.38233716E-10 2

-8.35330937E+07-2.20961354E+04-4.75162115E+02 1.62169100E+01 5.35242539E-03 3

-3.41745790E-05 2.16661154E-08-8.23773673E+07 1.32664635E+03 4

(B2O3)540 021221B 1080O 1620 G 100.0 3000.0 800.0 1

4.05257972E+03 6.87231515E+00-4.41935877E-03 1.26782515E-06-1.38499721E-10 2

-8.36887563E+07-2.21359734E+04-4.75910579E+02 1.62460142E+01 5.36302705E-03 3

-3.42366334E-05 2.17049741E-08-8.25309523E+07 1.32855907E+03 4

(B2O3)541 021221B 1082O 1623 G 100.0 3000.0 800.0 1

4.06029468E+03 6.88466115E+00-4.42731275E-03 1.27010568E-06-1.38748671E-10 2

-8.38445296E+07-2.21780837E+04-4.76844809E+02 1.62770050E+01 5.37088943E-03 3

-3.42983521E-05 2.17447118E-08-8.26845389E+07 1.33111616E+03 4

(B2O3)542 021221B 1084O 1626 G 100.0 3000.0 800.0 1

4.06780422E+03 6.89745472E+00-4.43562487E-03 1.27250307E-06-1.39011088E-10 2

-8.40002576E+07-2.22191744E+04-4.77672641E+02 1.63065134E+01 5.38293932E-03 3

-3.43647835E-05 2.17863784E-08-8.28381207E+07 1.33332306E+03 4

(B2O3)543 021221B 1086O 1629 G 100.0 3000.0 800.0 1

4.07534010E+03 6.91003851E+00-4.44367033E-03 1.27480221E-06-1.39261774E-10 2

-8.41559845E+07-2.22602983E+04-4.78584986E+02 1.63374645E+01 5.38944227E-03 3

-3.44234999E-05 2.18244171E-08-8.29917108E+07 1.33581537E+03 4

(B2O3)544 021221B 1088O 1632 G 100.0 3000.0 800.0 1

4.08259384E+03 6.92349219E+00-4.45249044E-03 1.27736865E-06-1.39544336E-10 2

-8.43116439E+07-2.23000476E+04-4.79433370E+02 1.63677181E+01 5.39781991E-03 3

-3.44838467E-05 2.18628730E-08-8.31452961E+07 1.33805285E+03 4

(B2O3)545 021221B 1090O 1635 G 100.0 3000.0 800.0 1

4.09016366E+03 6.93581631E+00-4.46023366E-03 1.27954760E-06-1.39779329E-10 2

-8.44673532E+07-2.23412747E+04-4.80362797E+02 1.63988316E+01 5.40450685E-03 3

-3.45439451E-05 2.19019896E-08-8.32988830E+07 1.34058987E+03 4

(B2O3)546 021221B 1092O 1638 G 100.0 3000.0 800.0 1

4.09769376E+03 6.94857343E+00-4.46850478E-03 1.28193233E-06-1.40040563E-10 2

-8.46230936E+07-2.23824562E+04-4.81239523E+02 1.64293316E+01 5.41214320E-03 3

-3.46032771E-05 2.19398893E-08-8.34524717E+07 1.34294534E+03 4

(B2O3)547 021221B 1094O 1641 G 100.0 3000.0 800.0 1

4.10545729E+03 6.96065224E+00-4.47615739E-03 1.28410103E-06-1.40275755E-10 2

-8.47788818E+07-2.24247868E+04-4.82075723E+02 1.64590539E+01 5.42396632E-03 3

-3.46700065E-05 2.19818814E-08-8.36060621E+07 1.34518805E+03 4

(B2O3)548 021221B 1096O 1644 G 100.0 3000.0 800.0 1

4.11292398E+03 6.97339377E+00-4.48439366E-03 1.28648182E-06-1.40537265E-10 2

-8.49345851E+07-2.24655641E+04-4.82983533E+02 1.64900270E+01 5.42991029E-03 3

-3.47275243E-05 2.20191736E-08-8.37596475E+07 1.34764529E+03 4

(B2O3)549 021221B 1098O 1647 G 100.0 3000.0 800.0 1

4.12030793E+03 6.98646814E+00-4.49288806E-03 1.28893542E-06-1.40806570E-10 2

-8.50902882E+07-2.25059760E+04-4.83824750E+02 1.65200749E+01 5.43918225E-03 3

-3.47893746E-05 2.20584537E-08-8.39132413E+07 1.34987603E+03 4

(B2O3)550 021221B 1100O 1650 G 100.0 3000.0 800.0 1

4.12778002E+03 6.99924252E+00-4.50109682E-03 1.29127905E-06-1.41060971E-10 2

-8.52459943E+07-2.25467766E+04-4.84748499E+02 1.65510651E+01 5.44594884E-03 3

-3.48487338E-05 2.20968488E-08-8.40668301E+07 1.35240658E+03 4

(B2O3)551 021221B 1102O 1653 G 100.0 3000.0 800.0 1

4.13554994E+03 7.01135529E+00-4.50886464E-03 1.29351510E-06-1.41307022E-10 2

-8.54017810E+07-2.25891374E+04-4.85658799E+02 1.65819283E+01 5.45376414E-03 3

-3.49102069E-05 2.21364606E-08-8.42204207E+07 1.35487423E+03 4

(B2O3)552 021221B 1104O 1656 G 100.0 3000.0 800.0 1

4.14298514E+03 7.02437243E+00-4.51736777E-03 1.29598109E-06-1.41578058E-10 2

-8.55575056E+07-2.26298696E+04-4.86476280E+02 1.66114100E+01 5.46547493E-03 3

-3.49757009E-05 2.21775460E-08-8.43740129E+07 1.35703156E+03 4

(B2O3)553 021221B 1106O 1659 G 100.0 3000.0 800.0 1

4.15044458E+03 7.03707242E+00-4.52548101E-03 1.29829633E-06-1.41829963E-10 2

-8.57132137E+07-2.26706478E+04-4.87271489E+02 1.66406373E+01 5.47771465E-03 3

-3.50417781E-05 2.22188562E-08-8.45276000E+07 1.35911404E+03 4

(B2O3)554 021221B 1108O 1662 G 100.0 3000.0 800.0 1

4.15801460E+03 7.04958903E+00-4.53350452E-03 1.30059696E-06-1.42081731E-10 2

-8.58689657E+07-2.27119962E+04-4.88171212E+02 1.66710945E+01 5.48631342E-03 3

-3.51036895E-05 2.22585350E-08-8.46811956E+07 1.36158098E+03 4

(B2O3)555 021221B 1110O 1665 G 100.0 3000.0 800.0 1

4.16563045E+03 7.06211365E+00-4.54147016E-03 1.30285338E-06-1.42325630E-10 2

-8.60247181E+07-2.27536095E+04-4.88992033E+02 1.67005444E+01 5.49920772E-03 3

-3.51715613E-05 2.23008980E-08-8.48347861E+07 1.36375372E+03 4

(B2O3)556 021221B 1112O 1668 G 100.0 3000.0 800.0 1

4.17321119E+03 7.07459029E+00-4.54951638E-03 1.30517140E-06-1.42579637E-10 2

-8.61804504E+07-2.27949501E+04-4.89952068E+02 1.67321221E+01 5.50402445E-03 3

-3.52287880E-05 2.23385212E-08-8.49883782E+07 1.36639153E+03 4

(B2O3)557 021221B 1114O 1671 G 100.0 3000.0 800.0 1

4.18059767E+03 7.08757792E+00-4.55788571E-03 1.30757089E-06-1.42841381E-10 2

-8.63361515E+07-2.28353155E+04-4.90833037E+02 1.67630086E+01 5.50968278E-03 3

-3.52851550E-05 2.23750247E-08-8.51419789E+07 1.36874752E+03 4

(B2O3)558 021221B 1116O 1674 G 100.0 3000.0 800.0 1

4.18822376E+03 7.09996045E+00-4.56579634E-03 1.30983151E-06-1.43087975E-10 2

-8.64919057E+07-2.28769501E+04-4.91673857E+02 1.67927098E+01 5.52115407E-03 3

-3.53510094E-05 2.24164834E-08-8.52955675E+07 1.37100822E+03 4

(B2O3)559 021221B 1118O 1677 G 100.0 3000.0 800.0 1

4.19573734E+03 7.11274824E+00-4.57415379E-03 1.31226129E-06-1.43355851E-10 2

-8.66476416E+07-2.29180141E+04-4.92655756E+02 1.68245970E+01 5.52439269E-03 3

-3.54052366E-05 2.24523552E-08-8.54491647E+07 1.37371168E+03 4

(B2O3)560 021221B 1120O 1680 G 100.0 3000.0 800.0 1

4.20344743E+03 7.12506426E+00-4.58202447E-03 1.31451270E-06-1.43601912E-10 2

-8.68034367E+07-2.29601455E+04-4.93409513E+02 1.68527901E+01 5.54256750E-03 3

-3.54813947E-05 2.24990787E-08-8.56027636E+07 1.37569375E+03 4

(B2O3)561 021221B 1122O 1683 G 100.0 3000.0 800.0 1

4.21084591E+03 7.13800751E+00-4.59035829E-03 1.31690504E-06-1.43863270E-10 2

-8.69591545E+07-2.30006691E+04-4.94458054E+02 1.68848277E+01 5.54521514E-03 3

-3.55343701E-05 2.25341975E-08-8.57563572E+07 1.37867223E+03 4

(B2O3)562 021221B 1124O 1686 G 100.0 3000.0 800.0 1

4.21822420E+03 7.15105262E+00-4.59882638E-03 1.31934331E-06-1.44129645E-10 2

-8.71148584E+07-2.30410635E+04-4.95214865E+02 1.69135489E+01 5.55944954E-03 3

-3.56033060E-05 2.25769199E-08-8.59099525E+07 1.38063117E+03 4

(B2O3)563 021221B 1126O 1689 G 100.0 3000.0 800.0 1

4.22593001E+03 7.16329692E+00-4.60666562E-03 1.32158598E-06-1.44374532E-10 2

-8.72706416E+07-2.30830711E+04-4.96104481E+02 1.69442635E+01 5.56726430E-03 3

-3.56642081E-05 2.26160566E-08-8.60635563E+07 1.38303914E+03 4

(B2O3)564 021221B 1128O 1692 G 100.0 3000.0 800.0 1

4.23344333E+03 7.17581915E+00-4.61461925E-03 1.32384773E-06-1.44620062E-10 2

-8.74263571E+07-2.31240789E+04-4.97063021E+02 1.69756611E+01 5.57223934E-03 3

-3.57209566E-05 2.26531903E-08-8.62171480E+07 1.38566857E+03 4

(B2O3)565 021221B 1130O 1695 G 100.0 3000.0 800.0 1

4.24102445E+03 7.18842808E+00-4.62274091E-03 1.32617883E-06-1.44874573E-10 2

-8.75821025E+07-2.31654585E+04-4.97950272E+02 1.70063284E+01 5.58049642E-03 3

-3.57826264E-05 2.26927496E-08-8.63707482E+07 1.38805470E+03 4

(B2O3)566 021221B 1132O 1698 G 100.0 3000.0 800.0 1

4.24851407E+03 7.20110590E+00-4.63083977E-03 1.32848976E-06-1.45126511E-10 2

-8.77378380E+07-2.32063755E+04-4.98788474E+02 1.70363605E+01 5.58921266E-03 3

-3.58430004E-05 2.27310168E-08-8.65243500E+07 1.39029564E+03 4

(B2O3)567 021221B 1134O 1701 G 100.0 3000.0 800.0 1

4.25605687E+03 7.21393463E+00-4.63927886E-03 1.33095408E-06-1.45398778E-10 2

-8.78935956E+07-2.32476743E+04-4.99621382E+02 1.70660753E+01 5.60054549E-03 3

-3.59085311E-05 2.27723125E-08-8.66779466E+07 1.39249716E+03 4

(B2O3)568 021221B 1136O 1704 G 100.0 3000.0 800.0 1

4.26348072E+03 7.22671944E+00-4.64743356E-03 1.33327421E-06-1.45650463E-10 2

-8.80492945E+07-2.32881748E+04-5.00553662E+02 1.70974703E+01 5.60534803E-03 3

-3.59649750E-05 2.28093228E-08-8.68315517E+07 1.39503307E+03 4

(B2O3)569 021221B 1138O 1707 G 100.0 3000.0 800.0 1

4.27108438E+03 7.23924080E+00-4.65548325E-03 1.33558785E-06-1.45904011E-10 2

-8.82050635E+07-2.33297396E+04-5.01394376E+02 1.71270096E+01 5.61767403E-03 3

-3.60321541E-05 2.28514762E-08-8.69851516E+07 1.39729871E+03 4

(B2O3)570 021221B 1140O 1710 G 100.0 3000.0 800.0 1

4.27852943E+03 7.25194306E+00-4.66353126E-03 1.33786361E-06-1.46149629E-10 2

-8.83607719E+07-2.33703930E+04-5.02270597E+02 1.71573483E+01 5.62627775E-03 3

-3.60935666E-05 2.28906921E-08-8.71387530E+07 1.39966068E+03 4

(B2O3)571 021221B 1142O 1713 G 100.0 3000.0 800.0 1

4.28617613E+03 7.26445001E+00-4.67163917E-03 1.34020685E-06-1.46407365E-10 2

-8.85165415E+07-2.34121290E+04-5.03155929E+02 1.71879500E+01 5.63506791E-03 3

-3.61563500E-05 2.29309281E-08-8.72923560E+07 1.40204323E+03 4

(B2O3)572 021221B 1144O 1716 G 100.0 3000.0 800.0 1

4.29349057E+03 7.27750266E+00-4.68005290E-03 1.34261202E-06-1.46668369E-10 2

-8.86722379E+07-2.34521861E+04-5.04089474E+02 1.72186633E+01 5.64191671E-03 3

-3.62147718E-05 2.29684964E-08-8.74459607E+07 1.40461561E+03 4

(B2O3)573 021221B 1146O 1719 G 100.0 3000.0 800.0 1

4.30117962E+03 7.28984492E+00-4.68798473E-03 1.34489582E-06-1.46919278E-10 2

-8.88280259E+07-2.34941696E+04-5.05029295E+02 1.72497638E+01 5.64849876E-03 3

-3.62739487E-05 2.30068228E-08-8.75995600E+07 1.40720061E+03 4

(B2O3)574 021221B 1148O 1722 G 100.0 3000.0 800.0 1

4.30872973E+03 7.30247840E+00-4.69611481E-03 1.34722940E-06-1.47174312E-10 2

-8.89837797E+07-2.35354135E+04-5.05854842E+02 1.72794178E+01 5.66012964E-03 3

-3.63400913E-05 2.30484918E-08-8.77531679E+07 1.40939849E+03 4

(B2O3)575 021221B 1150O 1725 G 100.0 3000.0 800.0 1

4.31636522E+03 7.31476050E+00-4.70395979E-03 1.34947885E-06-1.47420844E-10 2

-8.91395443E+07-2.35770831E+04-5.06660601E+02 1.73090786E+01 5.67064769E-03 3

-3.64037646E-05 2.30886221E-08-8.79067703E+07 1.41149236E+03 4

(B2O3)576 021221B 1152O 1728 G 100.0 3000.0 800.0 1

4.32362453E+03 7.32814222E+00-4.71267206E-03 1.35198289E-06-1.47693154E-10 2

-8.92952202E+07-2.36168178E+04-5.07601980E+02 1.73403387E+01 5.67592931E-03 3

-3.64604061E-05 2.31255188E-08-8.80603744E+07 1.41408347E+03 4

(B2O3)577 021221B 1154O 1731 G 100.0 3000.0 800.0 1

4.33140725E+03 7.34034298E+00-4.72054776E-03 1.35426341E-06-1.47945190E-10 2

-8.94510372E+07-2.36592876E+04-5.08517356E+02 1.73710684E+01 5.68466781E-03 3

-3.65233762E-05 2.31659165E-08-8.82139800E+07 1.41659090E+03 4

(B2O3)578 021221B 1156O 1734 G 100.0 3000.0 800.0 1

4.33886800E+03 7.35313544E+00-4.72875429E-03 1.35660797E-06-1.48200270E-10 2

-8.96067631E+07-2.37000447E+04-5.09394045E+02 1.74019628E+01 5.69003127E-03 3

-3.65788779E-05 2.32017661E-08-8.83675873E+07 1.41891776E+03 4

(B2O3)579 021221B 1158O 1737 G 100.0 3000.0 800.0 1

4.34647528E+03 7.36563696E+00-4.73675180E-03 1.35889306E-06-1.48449357E-10 2

-8.97625280E+07-2.37416107E+04-5.10248485E+02 1.74317010E+01 5.70198646E-03 3

-3.66458878E-05 2.32439526E-08-8.85211890E+07 1.42122177E+03 4

(B2O3)580 021221B 1160O 1740 G 100.0 3000.0 800.0 1

4.35376032E+03 7.37883962E+00-4.74526539E-03 1.36133821E-06-1.48716208E-10 2

-8.99182101E+07-2.37814583E+04-5.11093847E+02 1.74618539E+01 5.71080495E-03 3

-3.67072043E-05 2.32830502E-08-8.86747994E+07 1.42346738E+03 4

(B2O3)581 021221B 1162O 1743 G 100.0 3000.0 800.0 1

4.36129507E+03 7.39128079E+00-4.75317916E-03 1.36358884E-06-1.48960649E-10 2

-9.00739393E+07-2.38225434E+04-5.11995724E+02 1.74928265E+01 5.71672754E-03 3

-3.67648925E-05 2.33205129E-08-8.88284043E+07 1.42589343E+03 4

(B2O3)582 021221B 1164O 1746 G 100.0 3000.0 800.0 1

4.36901187E+03 7.40361917E+00-4.76117110E-03 1.36589499E-06-1.49213882E-10 2

-9.02297447E+07-2.38646571E+04-5.12892628E+02 1.75234908E+01 5.72516782E-03 3

-3.68270063E-05 2.33603460E-08-8.89820179E+07 1.42832945E+03 4

(B2O3)583 021221B 1166O 1749 G 100.0 3000.0 800.0 1

4.37660088E+03 7.41623607E+00-4.76933742E-03 1.36824736E-06-1.49471507E-10 2

-9.03855164E+07-2.39061262E+04-5.13757404E+02 1.75536478E+01 5.73478609E-03 3

-3.68898402E-05 2.34001640E-08-8.91356260E+07 1.43066884E+03 4

(B2O3)584 021221B 1168O 1752 G 100.0 3000.0 800.0 1

4.38393272E+03 7.42929662E+00-4.77778362E-03 1.37068430E-06-1.49738670E-10 2

-9.05412278E+07-2.39463009E+04-5.14609457E+02 1.75832948E+01 5.74565444E-03 3

-3.69541625E-05 2.34407516E-08-8.92892356E+07 1.43296054E+03 4

(B2O3)585 021221B 1170O 1755 G 100.0 3000.0 800.0 1

4.39175160E+03 7.44132397E+00-4.78541945E-03 1.37285736E-06-1.49975661E-10 2

-9.06970589E+07-2.39890086E+04-5.15482804E+02 1.76129816E+01 5.75863903E-03 3

-3.70233968E-05 2.34842847E-08-8.94428396E+07 1.43533564E+03 4

(B2O3)586 021221B 1172O 1758 G 100.0 3000.0 800.0 1

4.39942259E+03 7.45359439E+00-4.79329518E-03 1.37511149E-06-1.50221176E-10 2

-9.08528408E+07-2.40308482E+04-5.16260988E+02 1.76422273E+01 5.77131269E-03 3

-3.70906647E-05 2.35263063E-08-8.95964523E+07 1.43735642E+03 4

(B2O3)587 021221B 1174O 1761 G 100.0 3000.0 800.0 1

4.40670756E+03 7.46694948E+00-4.80200130E-03 1.37763125E-06-1.50497803E-10 2

-9.10085354E+07-2.40707248E+04-5.17219948E+02 1.76736945E+01 5.77610093E-03 3

-3.71468802E-05 2.35631152E-08-8.97500666E+07 1.44000602E+03 4

(B2O3)588 021221B 1176O 1764 G 100.0 3000.0 800.0 1

4.41433649E+03 7.47931301E+00-4.80986760E-03 1.37986886E-06-1.50740902E-10 2

-9.11643050E+07-2.41123559E+04-5.18037558E+02 1.77033285E+01 5.78742430E-03 3

-3.72120812E-05 2.36040766E-08-8.99036753E+07 1.44216985E+03 4

(B2O3)589 021221B 1178O 1767 G 100.0 3000.0 800.0 1

4.42181960E+03 7.49214214E+00-4.81812815E-03 1.38223890E-06-1.50999675E-10 2

-9.13200406E+07-2.41532512E+04-5.18970203E+02 1.77345344E+01 5.79335963E-03 3

-3.72701011E-05 2.36417783E-08-9.00572855E+07 1.44470591E+03 4

(B2O3)590 021221B 1180O 1770 G 100.0 3000.0 800.0 1

4.42917681E+03 7.50532177E+00-4.82674672E-03 1.38474032E-06-1.51274711E-10 2

-9.14757539E+07-2.41935179E+04-5.19846043E+02 1.77650743E+01 5.80096610E-03 3

-3.73297648E-05 2.36800517E-08-9.02108972E+07 1.44705586E+03 4

(B2O3)591 021221B 1182O 1773 G 100.0 3000.0 800.0 1

4.43689881E+03 7.51734627E+00-4.83435197E-03 1.38689326E-06-1.51508021E-10 2

-9.16315445E+07-2.42355776E+04-5.20774474E+02 1.77962812E+01 5.80647978E-03 3

-3.73871664E-05 2.37174167E-08-9.03645105E+07 1.44959086E+03 4

(B2O3)592 021221B 1184O 1776 G 100.0 3000.0 800.0 1

4.44447541E+03 7.52987224E+00-4.84241969E-03 1.38921683E-06-1.51762636E-10 2

-9.17873009E+07-2.42769216E+04-5.21636952E+02 1.78265007E+01 5.81631821E-03 3

-3.74512516E-05 2.37582402E-08-9.05181253E+07 1.45190138E+03 4

(B2O3)593 021221B 1186O 1779 G 100.0 3000.0 800.0 1

4.45195387E+03 7.54259331E+00-4.85052766E-03 1.39152181E-06-1.52012865E-10 2

-9.19430484E+07-2.43178078E+04-5.22449508E+02 1.78560681E+01 5.82712524E-03 3

-3.75148962E-05 2.37982111E-08-9.06717417E+07 1.45404437E+03 4

(B2O3)594 021221B 1188O 1782 G 100.0 3000.0 800.0 1

4.45957889E+03 7.55513182E+00-4.85862870E-03 1.39385141E-06-1.52267691E-10 2

-9.20988302E+07-2.43594896E+04-5.23278226E+02 1.78855549E+01 5.83999978E-03 3

-3.75832122E-05 2.38410257E-08-9.08253523E+07 1.45624819E+03 4

(B2O3)595 021221B 1190O 1785 G 100.0 3000.0 800.0 1

4.46703944E+03 7.56787832E+00-4.86677307E-03 1.39617229E-06-1.52519692E-10 2

-9.22545607E+07-2.44002008E+04-5.24193568E+02 1.79166042E+01 5.84615915E-03 3

-3.76414907E-05 2.38788747E-08-9.09789718E+07 1.45874796E+03 4

(B2O3)596 021221B 1192O 1788 G 100.0 3000.0 800.0 1

4.47451956E+03 7.58065311E+00-4.87502439E-03 1.39854730E-06-1.52779748E-10 2

-9.24102984E+07-2.44410772E+04-5.25097927E+02 1.79475731E+01 5.85227896E-03 3

-3.76992854E-05 2.39163063E-08-9.11325854E+07 1.46117381E+03 4

(B2O3)597 021221B 1194O 1791 G 100.0 3000.0 800.0 1

4.48193370E+03 7.59346195E+00-4.88322293E-03 1.40088838E-06-1.53034370E-10 2

-9.25660134E+07-2.44815633E+04-5.25986323E+02 1.79781782E+01 5.85968050E-03 3

-3.77588609E-05 2.39545839E-08-9.12862006E+07 1.46357931E+03 4

(B2O3)598 021221B 1196O 1794 G 100.0 3000.0 800.0 1

4.48985242E+03 7.60527670E+00-4.89080839E-03 1.40307306E-06-1.53274974E-10 2

-9.27218746E+07-2.45247239E+04-5.26839211E+02 1.80081793E+01 5.87079243E-03 3

-3.78249822E-05 2.39964061E-08-9.14398173E+07 1.46587162E+03 4

(B2O3)599 021221B 1198O 1797 G 100.0 3000.0 800.0 1

4.49708732E+03 7.61868213E+00-4.89952866E-03 1.40559620E-06-1.53552098E-10 2

-9.28775601E+07-2.45643414E+04-5.27763988E+02 1.80395858E+01 5.87437519E-03 3

-3.78781809E-05 2.40313204E-08-9.15934355E+07 1.46836674E+03 4

(B2O3)600 021221B 1200O 1800 G 100.0 3000.0 800.0 1

4.50472296E+03 7.63117840E+00-4.90760224E-03 1.40792218E-06-1.53806857E-10 2

-9.30333592E+07-2.46060842E+04-5.28537687E+02 1.80681339E+01 5.89084972E-03 3

-3.79517887E-05 2.40768058E-08-9.17470553E+07 1.47041576E+03 4

(B2O3)601 021221B 1202O 1803 G 100.0 3000.0 800.0 1

4.51203293E+03 7.64428074E+00-4.91607188E-03 1.41035463E-06-1.54072208E-10 2

-9.31890758E+07-2.46461554E+04-5.29485451E+02 1.80989171E+01 5.89717960E-03 3

-3.80090651E-05 2.41136799E-08-9.19006692E+07 1.47305108E+03 4

(B2O3)602 021221B 1204O 1806 G 100.0 3000.0 800.0 1

4.51959882E+03 7.65677329E+00-4.92398290E-03 1.41258934E-06-1.54313492E-10 2

-9.33448308E+07-2.46873966E+04-5.30411280E+02 1.81301927E+01 5.90285998E-03 3

-3.80669706E-05 2.41514233E-08-9.20542919E+07 1.47557231E+03 4

(B2O3)603 021221B 1206O 1809 G 100.0 3000.0 800.0 1

4.52746455E+03 7.66859028E+00-4.93149948E-03 1.41473888E-06-1.54548834E-10 2

-9.35006671E+07-2.47302546E+04-5.31284821E+02 1.81603881E+01 5.91338600E-03 3

-3.81325315E-05 2.41930753E-08-9.22079088E+07 1.47792329E+03 4

(B2O3)604 021221B 1208O 1812 G 100.0 3000.0 800.0 1

4.53476798E+03 7.68186751E+00-4.94015749E-03 1.41724550E-06-1.54823819E-10 2

-9.36563771E+07-2.47702715E+04-5.32139495E+02 1.81904052E+01 5.92294717E-03 3

-3.81948824E-05 2.42326269E-08-9.23615272E+07 1.48020889E+03 4

(B2O3)605 021221B 1210O 1815 G 100.0 3000.0 800.0 1

4.54227119E+03 7.69459811E+00-4.94831453E-03 1.41957186E-06-1.55076422E-10 2

-9.38121232E+07-2.48112463E+04-5.33023807E+02 1.82209487E+01 5.93129208E-03 3

-3.82562677E-05 2.42719161E-08-9.25151470E+07 1.48259482E+03 4

(B2O3)606 021221B 1212O 1818 G 100.0 3000.0 800.0 1

4.54988871E+03 7.70707139E+00-4.95636027E-03 1.42189482E-06-1.55332019E-10 2

-9.39679097E+07-2.48528512E+04-5.33883579E+02 1.82510570E+01 5.94140508E-03 3

-3.83206043E-05 2.43128652E-08-9.26687684E+07 1.48489579E+03 4

(B2O3)607 021221B 1214O 1821 G 100.0 3000.0 800.0 1

4.55726147E+03 7.71997501E+00-4.96463753E-03 1.42426731E-06-1.55591243E-10 2

-9.41236349E+07-2.48931489E+04-5.34736761E+02 1.82815376E+01 5.94747772E-03 3

-3.83764437E-05 2.43487019E-08-9.28223912E+07 1.48717035E+03 4

(B2O3)608 021221B 1216O 1824 G 100.0 3000.0 800.0 1

4.56509656E+03 7.73194265E+00-4.97231116E-03 1.42646044E-06-1.55830118E-10 2

-9.42794595E+07-2.49358224E+04-5.35621243E+02 1.83119244E+01 5.95819993E-03 3

-3.84432001E-05 2.43912194E-08-9.29760156E+07 1.48955087E+03 4

(B2O3)609 021221B 1218O 1827 G 100.0 3000.0 800.0 1

4.57241833E+03 7.74516833E+00-4.98092456E-03 1.42895438E-06-1.56103960E-10 2

-9.44351838E+07-2.49759472E+04-5.36551139E+02 1.83425053E+01 5.96623848E-03 3

-3.85038822E-05 2.44301457E-08-9.31296339E+07 1.49214040E+03 4

(B2O3)610 021221B 1220O 1830 G 100.0 3000.0 800.0 1

4.58006878E+03 7.75747863E+00-4.98875202E-03 1.43118011E-06-1.56346037E-10 2

-9.45909750E+07-2.50176665E+04-5.37478420E+02 1.83738652E+01 5.97106908E-03 3

-3.85600430E-05 2.44668441E-08-9.32832612E+07 1.49465159E+03 4

(B2O3)611 021221B 1222O 1833 G 100.0 3000.0 800.0 1

4.58730727E+03 7.77081656E+00-4.99736154E-03 1.43364566E-06-1.56614033E-10 2

-9.47466658E+07-2.50573362E+04-5.38404994E+02 1.84045187E+01 5.97867507E-03 3

-3.86198535E-05 2.45051992E-08-9.34368825E+07 1.49719416E+03 4

(B2O3)612 021221B 1224O 1836 G 100.0 3000.0 800.0 1

4.59490312E+03 7.78336783E+00-5.00547199E-03 1.43598965E-06-1.56871833E-10 2

-9.49024438E+07-2.50988019E+04-5.39329710E+02 1.84355754E+01 5.98536711E-03 3

-3.86793087E-05 2.45437201E-08-9.35905053E+07 1.49972010E+03 4

(B2O3)613 021221B 1226O 1839 G 100.0 3000.0 800.0 1

4.60275587E+03 7.79536544E+00-5.01320451E-03 1.43821679E-06-1.57116438E-10 2

-9.50583001E+07-2.51416813E+04-5.40099916E+02 1.84644371E+01 6.00022346E-03 3

-3.87500006E-05 2.45874438E-08-9.37441295E+07 1.50170472E+03 4

(B2O3)614 021221B 1228O 1842 G 100.0 3000.0 800.0 1

4.61014707E+03 7.80834184E+00-5.02156200E-03 1.44061342E-06-1.57378069E-10 2

-9.52140365E+07-2.51821059E+04-5.40972414E+02 1.84948008E+01 6.00835196E-03 3

-3.88103826E-05 2.46261114E-08-9.38977552E+07 1.50406212E+03 4

(B2O3)615 021221B 1230O 1845 G 100.0 3000.0 800.0 1

4.61761166E+03 7.82113927E+00-5.02980252E-03 1.44297104E-06-1.57634313E-10 2

-9.53697823E+07-2.52228764E+04-5.41836667E+02 1.85251357E+01 6.01695326E-03 3

-3.88717541E-05 2.46652826E-08-9.40513824E+07 1.50638651E+03 4

(B2O3)616 021221B 1232O 1848 G 100.0 3000.0 800.0 1

4.62525013E+03 7.83354238E+00-5.03772905E-03 1.44523697E-06-1.57881637E-10 2

-9.55255793E+07-2.52646846E+04-5.42624207E+02 1.85536328E+01 6.03378707E-03 3

-3.89458340E-05 2.47109173E-08-9.42050034E+07 1.50843575E+03 4

(B2O3)617 021221B 1234O 1851 G 100.0 3000.0 800.0 1

4.63277341E+03 7.84616976E+00-5.04584905E-03 1.44757274E-06-1.58137772E-10 2

-9.56813278E+07-2.53056908E+04-5.43497656E+02 1.85841341E+01 6.04286835E-03 3

-3.90094453E-05 2.47518078E-08-9.43586335E+07 1.51079643E+03 4

(B2O3)618 021221B 1236O 1854 G 100.0 3000.0 800.0 1

4.64023495E+03 7.85901117E+00-5.05415749E-03 1.44996503E-06-1.58399421E-10 2

-9.58370827E+07-2.53464671E+04-5.44506430E+02 1.86163918E+01 6.04387312E-03 3

-3.90594769E-05 2.47852812E-08-9.45122574E+07 1.51362022E+03 4

(B2O3)619 021221B 1238O 1857 G 100.0 3000.0 800.0 1

4.64776948E+03 7.87160728E+00-5.06219862E-03 1.45225155E-06-1.58647491E-10 2

-9.59928480E+07-2.53876163E+04-5.45318691E+02 1.86462403E+01 6.05342675E-03 3

-3.91212333E-05 2.48242767E-08-9.46658828E+07 1.51574518E+03 4

(B2O3)620 021221B 1240O 1860 G 100.0 3000.0 800.0 1

4.65518479E+03 7.88456406E+00-5.07056122E-03 1.45466073E-06-1.58911594E-10 2

-9.61485910E+07-2.54281964E+04-5.46217322E+02 1.86769209E+01 6.06064868E-03 3

-3.91804535E-05 2.48623794E-08-9.48195097E+07 1.51816384E+03 4

(B2O3)621 021221B 1242O 1863 G 100.0 3000.0 800.0 1

4.66286867E+03 7.89693646E+00-5.07858066E-03 1.45697807E-06-1.59166249E-10 2

-9.63043943E+07-2.54701105E+04-5.47088710E+02 1.87071757E+01 6.07094254E-03 3

-3.92456762E-05 2.49038955E-08-9.49731379E+07 1.52052165E+03 4

(B2O3)622 021221B 1244O 1866 G 100.0 3000.0 800.0 1

4.67033468E+03 7.90960531E+00-5.08665763E-03 1.45927397E-06-1.59415035E-10 2

-9.64601409E+07-2.55108568E+04-5.47994081E+02 1.87382112E+01 6.07597279E-03 3

-3.93010171E-05 2.49397783E-08-9.51267676E+07 1.52298404E+03 4

(B2O3)623 021221B 1246O 1869 G 100.0 3000.0 800.0 1

4.67798910E+03 7.92205454E+00-5.09467406E-03 1.46157711E-06-1.59667023E-10 2

-9.66159382E+07-2.55526237E+04-5.48910978E+02 1.87692420E+01 6.08313157E-03 3

-3.93614168E-05 2.49788276E-08-9.52803988E+07 1.52546858E+03 4

(B2O3)624 021221B 1248O 1872 G 100.0 3000.0 800.0 1

4.68560698E+03 7.93449096E+00-5.10262496E-03 1.46385582E-06-1.59916491E-10 2

-9.67717403E+07-2.55942529E+04-5.49652442E+02 1.87978173E+01 6.09813347E-03 3

-3.94316521E-05 2.50222442E-08-9.54340314E+07 1.52736656E+03 4

(B2O3)625 021221B 1250O 1875 G 100.0 3000.0 800.0 1

4.69299406E+03 7.94754202E+00-5.11106034E-03 1.46627272E-06-1.60179453E-10 2

-9.69274748E+07-2.56346757E+04-5.50586920E+02 1.88289334E+01 6.10395183E-03 3

-3.94889910E-05 2.50594375E-08-9.55876578E+07 1.52991984E+03 4

(B2O3)626 021221B 1252O 1878 G 100.0 3000.0 800.0 1

4.70039803E+03 7.96042717E+00-5.11934694E-03 1.46865243E-06-1.60439894E-10 2

-9.70832130E+07-2.56751506E+04-5.51427692E+02 1.88590096E+01 6.11255236E-03 3

-3.95494719E-05 2.50979192E-08-9.57412855E+07 1.53216207E+03 4

(B2O3)627 021221B 1254O 1881 G 100.0 3000.0 800.0 1

4.70825689E+03 7.97230173E+00-5.12690411E-03 1.47080222E-06-1.60673570E-10 2

-9.72390594E+07-2.57179355E+04-5.52344980E+02 1.88899141E+01 6.12093107E-03 3

-3.96124765E-05 2.51384871E-08-9.58949224E+07 1.53466045E+03 4

(B2O3)628 021221B 1256O 1884 G 100.0 3000.0 800.0 1

4.71572074E+03 7.98516636E+00-5.13526183E-03 1.47322649E-06-1.60940597E-10 2

-9.73948217E+07-2.57587558E+04-5.53226720E+02 1.89204084E+01 6.12867745E-03 3

-3.96722992E-05 2.51768080E-08-9.60485531E+07 1.53704232E+03 4

(B2O3)629 021221B 1258O 1887 G 100.0 3000.0 800.0 1

4.72308873E+03 7.99816729E+00-5.14367573E-03 1.47565345E-06-1.61206856E-10 2

-9.75505412E+07-2.57990104E+04-5.54073169E+02 1.89507622E+01 6.13674443E-03 3

-3.97327166E-05 2.52155083E-08-9.62021851E+07 1.53927701E+03 4

(B2O3)630 021221B 1260O 1890 G 100.0 3000.0 800.0 1

4.73068477E+03 8.01069875E+00-5.15169692E-03 1.47793223E-06-1.61453345E-10 2

-9.77063258E+07-2.58404783E+04-5.55009734E+02 1.89818973E+01 6.14342472E-03 3

-3.97922457E-05 2.52540470E-08-9.63558185E+07 1.54183589E+03 4

(B2O3)631 021221B 1262O 1893 G 100.0 3000.0 800.0 1

4.73810663E+03 8.02365463E+00-5.16008416E-03 1.48035569E-06-1.61719697E-10 2

-9.78620868E+07-2.58810876E+04-5.55828697E+02 1.90113711E+01 6.15503119E-03 3

-3.98576120E-05 2.52951352E-08-9.65094534E+07 1.54403568E+03 4

(B2O3)632 021221B 1264O 1896 G 100.0 3000.0 800.0 1

4.74576331E+03 8.03606254E+00-5.16807140E-03 1.48265135E-06-1.61970870E-10 2

-9.80178920E+07-2.59229274E+04-5.56676695E+02 1.90411280E+01 6.16664233E-03 3

-3.99238017E-05 2.53367469E-08-9.66630819E+07 1.54629704E+03 4

(B2O3)633 021221B 1266O 1899 G 100.0 3000.0 800.0 1

4.75328213E+03 8.04861637E+00-5.17606794E-03 1.48492855E-06-1.62218664E-10 2

-9.81736508E+07-2.59639365E+04-5.57555463E+02 1.90717778E+01 6.17412550E-03 3

-3.99839188E-05 2.53754632E-08-9.68167196E+07 1.54865110E+03 4

(B2O3)634 021221B 1268O 1902 G 100.0 3000.0 800.0 1

4.76084880E+03 8.06111375E+00-5.18405708E-03 1.48720963E-06-1.62466937E-10 2

-9.83294479E+07-2.60053345E+04-5.58400072E+02 1.91009598E+01 6.18788736E-03 3

-4.00534604E-05 2.54189557E-08-9.69703509E+07 1.55094989E+03 4

(B2O3)635 021221B 1270O 1905 G 100.0 3000.0 800.0 1

4.76833653E+03 8.07391185E+00-5.19231013E-03 1.48957429E-06-1.62724530E-10 2

-9.84852062E+07-2.60462418E+04-5.59276633E+02 1.91315181E+01 6.19573008E-03 3

-4.01136545E-05 2.54574794E-08-9.71239836E+07 1.55330122E+03 4

(B2O3)636 021221B 1272O 1908 G 100.0 3000.0 800.0 1

4.77585621E+03 8.08659023E+00-5.20050284E-03 1.49193490E-06-1.62983160E-10 2

-9.86409798E+07-2.60872724E+04-5.60222275E+02 1.91630490E+01 6.20006808E-03 3

-4.01693502E-05 2.54940580E-08-9.72776255E+07 1.55590237E+03 4

(B2O3)637 021221B 1274O 1911 G 100.0 3000.0 800.0 1

4.78337352E+03 8.09928929E+00-5.20869615E-03 1.49430029E-06-1.63243293E-10 2

-9.87967511E+07-2.61283492E+04-5.61057339E+02 1.91929868E+01 6.21028793E-03 3

-4.02332520E-05 2.55345833E-08-9.74312610E+07 1.55810781E+03 4

(B2O3)638 021221B 1276O 1914 G 100.0 3000.0 800.0 1

4.79090241E+03 8.11204995E+00-5.21696322E-03 1.49668322E-06-1.63504419E-10 2

-9.89525432E+07-2.61695500E+04-5.62051160E+02 1.92244960E+01 6.21511269E-03 3

-4.02891774E-05 2.55709408E-08-9.75848978E+07 1.56089141E+03 4

(B2O3)639 021221B 1278O 1917 G 100.0 3000.0 800.0 1

4.79855378E+03 8.12423961E+00-5.22470894E-03 1.49888705E-06-1.63744023E-10 2

-9.91083354E+07-2.62112819E+04-5.62899223E+02 1.92543884E+01 6.22579718E-03 3

-4.03543229E-05 2.56122656E-08-9.77385282E+07 1.56315316E+03 4

(B2O3)640 021221B 1280O 1920 G 100.0 3000.0 800.0 1

4.80607769E+03 8.13699747E+00-5.23286580E-03 1.50120040E-06-1.63993677E-10 2

-9.92641066E+07-2.62523703E+04-5.63790976E+02 1.92848067E+01 6.23568373E-03 3

-4.04188080E-05 2.56533742E-08-9.78921679E+07 1.56558315E+03 4

(B2O3)641 021221B 1282O 1923 G 100.0 3000.0 800.0 1

4.81343744E+03 8.15006452E+00-5.24136106E-03 1.50366260E-06-1.64264895E-10 2

-9.94198551E+07-2.62926554E+04-5.64797382E+02 1.93166829E+01 6.23846755E-03 3

-4.04717409E-05 2.56884118E-08-9.80458089E+07 1.56840436E+03 4

(B2O3)642 021221B 1284O 1926 G 100.0 3000.0 800.0 1

4.82106172E+03 8.16255174E+00-5.24939124E-03 1.50597261E-06-1.64518212E-10 2

-9.95756590E+07-2.63343085E+04-5.65657309E+02 1.93468468E+01 6.24802044E-03 3

-4.05345576E-05 2.57282820E-08-9.81994434E+07 1.57070331E+03 4

(B2O3)643 021221B 1286O 1929 G 100.0 3000.0 800.0 1

4.82865468E+03 8.17514703E+00-5.25748911E-03 1.50828440E-06-1.64769369E-10 2

-9.97314452E+07-2.63757348E+04-5.66505835E+02 1.93769714E+01 6.25883848E-03 3

-4.06004441E-05 2.57700949E-08-9.83530872E+07 1.57296036E+03 4

(B2O3)644 021221B 1288O 1932 G 100.0 3000.0 800.0 1

4.83620584E+03 8.18747427E+00-5.26531439E-03 1.51051400E-06-1.65012081E-10 2

-9.98872279E+07-2.64169932E+04-5.67457366E+02 1.94080273E+01 6.26433151E-03 3

-4.06572405E-05 2.58070038E-08-9.85067245E+07 1.57556380E+03 4

(B2O3)645 021221B 1290O 1935 G 100.0 3000.0 800.0 1

4.84362055E+03 8.20053569E+00-5.27383359E-03 1.51298239E-06-1.65283157E-10 2

-1.00042979E+08-2.64575373E+04-5.68366286E+02 1.94388986E+01 6.27153251E-03 3

-4.07171822E-05 2.58457191E-08-9.86603631E+07 1.57804073E+03 4

(B2O3)646 021221B 1292O 1938 G 100.0 3000.0 800.0 1

4.85125028E+03 8.21299408E+00-5.28185811E-03 1.51528980E-06-1.65536175E-10 2

-1.00198795E+08-2.64992557E+04-5.69122447E+02 1.94676212E+01 6.28608422E-03 3

-4.07867773E-05 2.58887761E-08-9.88140031E+07 1.57997935E+03 4

(B2O3)647 021221B 1294O 1941 G 100.0 3000.0 800.0 1

4.85881674E+03 8.22553053E+00-5.28988349E-03 1.51758672E-06-1.65786915E-10 2

-1.00354588E+08-2.65405917E+04-5.69979804E+02 1.94975591E+01 6.29647322E-03 3

-4.08508458E-05 2.59292884E-08-9.89676445E+07 1.58229184E+03 4

(B2O3)648 021221B 1296O 1944 G 100.0 3000.0 800.0 1

4.86637108E+03 8.23816147E+00-5.29805002E-03 1.51994246E-06-1.66045498E-10 2

-1.00510379E+08-2.65818392E+04-5.70905142E+02 1.95289756E+01 6.30067818E-03 3

-4.09057420E-05 2.59652760E-08-9.91212872E+07 1.58479963E+03 4

(B2O3)649 021221B 1298O 1947 G 100.0 3000.0 800.0 1

4.87401039E+03 8.25053953E+00-5.30593151E-03 1.52218269E-06-1.66288501E-10 2

-1.00666173E+08-2.66235170E+04-5.71793262E+02 1.95591498E+01 6.31170808E-03 3

-4.09722733E-05 2.60075093E-08-9.92749233E+07 1.58722330E+03 4

(B2O3)650 021221B 1300O 1950 G 100.0 3000.0 800.0 1

4.88155398E+03 8.26311850E+00-5.31396944E-03 1.52447437E-06-1.66537670E-10 2

-1.00821963E+08-2.66647246E+04-5.72642281E+02 1.95895137E+01 6.31906200E-03 3

-4.10304537E-05 2.60445541E-08-9.94285688E+07 1.58946540E+03 4

(B2O3)651 021221B 1302O 1953 G 100.0 3000.0 800.0 1

4.88903461E+03 8.27603251E+00-5.32233132E-03 1.52687964E-06-1.66800460E-10 2

-1.00977730E+08-2.67056144E+04-5.73555335E+02 1.96202631E+01 6.32729943E-03 3

-4.10922093E-05 2.60842137E-08-9.95822075E+07 1.59196617E+03 4

(B2O3)652 021221B 1304O 1956 G 100.0 3000.0 800.0 1

4.89658811E+03 8.28860946E+00-5.33043343E-03 1.52921062E-06-1.67055983E-10 2

-1.01133525E+08-2.67468654E+04-5.74352154E+02 1.96497867E+01 6.33869433E-03 3

-4.11575958E-05 2.61254284E-08-9.97358557E+07 1.59404793E+03 4

(B2O3)653 021221B 1306O 1959 G 100.0 3000.0 800.0 1

4.90395346E+03 8.30175259E+00-5.33903674E-03 1.53171295E-06-1.67331742E-10 2

-1.01289265E+08-2.67871693E+04-5.75291068E+02 1.96811984E+01 6.34315596E-03 3

-4.12128923E-05 2.61615805E-08-9.98894972E+07 1.59659326E+03 4

(B2O3)654 021221B 1308O 1962 G 100.0 3000.0 800.0 1

4.91162796E+03 8.31394800E+00-5.34676631E-03 1.53390713E-06-1.67570110E-10 2

-1.01445083E+08-2.68290276E+04-5.76107156E+02 1.97106893E+01 6.35516686E-03 3

-4.12795096E-05 2.62034608E-08-1.00043140E+08 1.59876890E+03 4

(B2O3)655 021221B 1310O 1965 G 100.0 3000.0 800.0 1

4.91910547E+03 8.32673839E+00-5.35498731E-03 1.53626071E-06-1.67826584E-10 2

-1.01600855E+08-2.68699124E+04-5.76942943E+02 1.97405739E+01 6.36530507E-03 3

-4.13427336E-05 2.62433990E-08-1.00196784E+08 1.60098085E+03 4

(B2O3)656 021221B 1312O 1968 G 100.0 3000.0 800.0 1

4.92666918E+03 8.33916007E+00-5.36286795E-03 1.53850299E-06-1.68070669E-10 2

-1.01756637E+08-2.69111480E+04-5.77887139E+02 1.97719719E+01 6.37012825E-03 3

-4.13991633E-05 2.62803532E-08-1.00350430E+08 1.60357526E+03 4

(B2O3)657 021221B 1314O 1971 G 100.0 3000.0 800.0 1

4.93417149E+03 8.35202073E+00-5.37125645E-03 1.54092808E-06-1.68336133E-10 2

-1.01912408E+08-2.69521171E+04-5.78749901E+02 1.98023172E+01 6.37975190E-03 3

-4.14630019E-05 2.63210462E-08-1.00504077E+08 1.60588659E+03 4

(B2O3)658 021221B 1316O 1974 G 100.0 3000.0 800.0 1

4.94154618E+03 8.36506141E+00-5.37965844E-03 1.54333984E-06-1.68599751E-10 2

-1.02068170E+08-2.69925419E+04-5.79679722E+02 1.98329733E+01 6.38697229E-03 3

-4.15219219E-05 2.63589069E-08-1.00657717E+08 1.60844618E+03 4

(B2O3)659 021221B 1318O 1977 G 100.0 3000.0 800.0 1

4.94922133E+03 8.37731559E+00-5.38747556E-03 1.54556786E-06-1.68842205E-10 2

-1.02223992E+08-2.70344119E+04-5.80467485E+02 1.98622069E+01 6.40000441E-03 3

-4.15899610E-05 2.64014199E-08-1.00811366E+08 1.61050631E+03 4

(B2O3)660 021221B 1320O 1980 G 100.0 3000.0 800.0 1

4.95674290E+03 8.39013001E+00-5.39582652E-03 1.54798869E-06-1.69108459E-10 2

-1.02379780E+08-2.70755489E+04-5.81367101E+02 1.98928994E+01 6.40767243E-03 3

-4.16501348E-05 2.64400087E-08-1.00965009E+08 1.61293708E+03 4

(B2O3)661 021221B 1322O 1983 G 100.0 3000.0 800.0 1

4.96410761E+03 8.40312510E+00-5.40425084E-03 1.55041728E-06-1.69374028E-10 2

-1.02535518E+08-2.71157614E+04-5.82286653E+02 1.99240186E+01 6.41343026E-03 3

-4.17078584E-05 2.64776003E-08-1.01118661E+08 1.61545358E+03 4

(B2O3)662 021221B 1324O 1986 G 100.0 3000.0 800.0 1

4.97177780E+03 8.41537757E+00-5.41201197E-03 1.55262488E-06-1.69614665E-10 2

-1.02691339E+08-2.71576243E+04-5.83153373E+02 1.99540392E+01 6.42399677E-03 3

-4.17728139E-05 2.65188153E-08-1.01272306E+08 1.61779467E+03 4

(B2O3)663 021221B 1326O 1989 G 100.0 3000.0 800.0 1

4.97943796E+03 8.42779188E+00-5.42005522E-03 1.55495143E-06-1.69870775E-10 2

-1.02847168E+08-2.71994690E+04-5.84010502E+02 1.99841815E+01 6.43353460E-03 3

-4.18356587E-05 2.65587222E-08-1.01425953E+08 1.62008624E+03 4

(B2O3)664 021221B 1328O 1992 G 100.0 3000.0 800.0 1

4.98691846E+03 8.44050667E+00-5.42819677E-03 1.55727605E-06-1.70123696E-10 2

-1.03002941E+08-2.72403551E+04-5.84828041E+02 2.00138322E+01 6.44447488E-03 3

-4.19001568E-05 2.65993631E-08-1.01579601E+08 1.62223127E+03 4

(B2O3)665 021221B 1330O 1995 G 100.0 3000.0 800.0 1

4.99446922E+03 8.45318505E+00-5.43636190E-03 1.55961453E-06-1.70378542E-10 2

-1.03158740E+08-2.72816166E+04-5.85637880E+02 2.00432465E+01 6.45693255E-03 3

-4.19671839E-05 2.66413164E-08-1.01733250E+08 1.62438534E+03 4

(B2O3)666 021221B 1332O 1998 G 100.0 3000.0 800.0 1

5.00202293E+03 8.46555333E+00-5.44414044E-03 1.56180465E-06-1.70614447E-10 2

-1.03314504E+08-2.73227479E+04-5.86587370E+02 2.00746844E+01 6.46256013E-03 3

-4.20259071E-05 2.66797896E-08-1.01886901E+08 1.62698112E+03 4

(B2O3)667 021221B 1334O 2001 G 100.0 3000.0 800.0 1

5.00947062E+03 8.47846735E+00-5.45255996E-03 1.56424937E-06-1.70883882E-10 2

-1.03470284E+08-2.73635117E+04-5.87467340E+02 2.01053076E+01 6.46894093E-03 3

-4.20828947E-05 2.67164279E-08-1.02040545E+08 1.62934479E+03 4

(B2O3)668 021221B 1336O 2004 G 100.0 3000.0 800.0 1

5.01711155E+03 8.49096825E+00-5.46064572E-03 1.56658502E-06-1.71140836E-10 2

-1.03626111E+08-2.74052335E+04-5.88310251E+02 2.01353954E+01 6.47875765E-03 3

-4.21461069E-05 2.67564964E-08-1.02194198E+08 1.63159340E+03 4

(B2O3)669 021221B 1338O 2007 G 100.0 3000.0 800.0 1

5.02454584E+03 8.50386949E+00-5.46896221E-03 1.56896469E-06-1.71399680E-10 2

-1.03781865E+08-2.74458211E+04-5.89252516E+02 2.01666064E+01 6.48547359E-03 3

-4.22062656E-05 2.67956117E-08-1.02347852E+08 1.63418291E+03 4

(B2O3)670 021221B 1340O 2010 G 100.0 3000.0 800.0 1

5.03218065E+03 8.51636068E+00-5.47700951E-03 1.57128212E-06-1.71654034E-10 2

-1.03937687E+08-2.74875321E+04-5.90116002E+02 2.01970771E+01 6.49328386E-03 3

-4.22659555E-05 2.68337206E-08-1.02501500E+08 1.63647587E+03 4

(B2O3)671 021221B 1342O 2013 G 100.0 3000.0 800.0 1

5.03959042E+03 8.52918477E+00-5.48523020E-03 1.57362799E-06-1.71908633E-10 2

-1.04093431E+08-2.75279837E+04-5.91043715E+02 2.02281522E+01 6.49945482E-03 3

-4.23244507E-05 2.68717389E-08-1.02655149E+08 1.63901535E+03 4

(B2O3)672 021221B 1344O 2016 G 100.0 3000.0 800.0 1

5.04714817E+03 8.54186887E+00-5.49346048E-03 1.57601217E-06-1.72171271E-10 2

-1.04249231E+08-2.75692889E+04-5.91892265E+02 2.02581382E+01 6.51004103E-03 3

-4.23892645E-05 2.69128035E-08-1.02808799E+08 1.64127673E+03 4

(B2O3)673 021221B 1346O 2019 G 100.0 3000.0 800.0 1

5.05460513E+03 8.55468171E+00-5.50169208E-03 1.57836500E-06-1.72427302E-10 2

-1.04405011E+08-2.76100051E+04-5.92824532E+02 2.02897775E+01 6.51270227E-03 3

-4.24410631E-05 2.69469277E-08-1.02962459E+08 1.64381365E+03 4

(B2O3)674 021221B 1348O 2022 G 100.0 3000.0 800.0 1

5.06222721E+03 8.56698991E+00-5.50950445E-03 1.58058462E-06-1.72668449E-10 2

-1.04560815E+08-2.76516000E+04-5.93518836E+02 2.03174112E+01 6.53254561E-03 3

-4.25198767E-05 2.69951371E-08-1.03116112E+08 1.64556869E+03 4

(B2O3)675 021221B 1350O 2025 G 100.0 3000.0 800.0 1

5.06976547E+03 8.57973964E+00-5.51773526E-03 1.58294462E-06-1.72925438E-10 2

-1.04716612E+08-2.76928385E+04-5.94462889E+02 2.03486553E+01 6.53813178E-03 3

-4.25769038E-05 2.70321120E-08-1.03269757E+08 1.64813713E+03 4

(B2O3)676 021221B 1352O 2028 G 100.0 3000.0 800.0 1

5.07723639E+03 8.59239756E+00-5.52585229E-03 1.58527467E-06-1.73180394E-10 2

-1.04872386E+08-2.77336125E+04-5.95308945E+02 2.03789787E+01 6.54560163E-03 3

-4.26356942E-05 2.70697053E-08-1.03423413E+08 1.65039425E+03 4

(B2O3)677 021221B 1354O 2031 G 100.0 3000.0 800.0 1

5.08500816E+03 8.60451011E+00-5.53357066E-03 1.58748089E-06-1.73421940E-10 2

-1.05028245E+08-2.77759948E+04-5.96200484E+02 2.04095210E+01 6.55453385E-03 3

-4.26985730E-05 2.71099586E-08-1.03577069E+08 1.65281206E+03 4

(B2O3)678 021221B 1356O 2034 G 100.0 3000.0 800.0 1

5.09238219E+03 8.61761627E+00-5.54207333E-03 1.58993138E-06-1.73689949E-10 2

-1.05184005E+08-2.78163653E+04-5.97099291E+02 2.04398139E+01 6.56400243E-03 3

-4.27616943E-05 2.71502047E-08-1.03730719E+08 1.65528426E+03 4

(B2O3)679 021221B 1358O 2037 G 100.0 3000.0 800.0 1

5.09977597E+03 8.63052518E+00-5.55044149E-03 1.59233577E-06-1.73952051E-10 2

-1.05339757E+08-2.78567438E+04-5.97999734E+02 2.04708923E+01 6.56925956E-03 3

-4.28180581E-05 2.71868755E-08-1.03884378E+08 1.65770161E+03 4

(B2O3)680 021221B 1360O 2040 G 100.0 3000.0 800.0 1

5.10762448E+03 8.64244232E+00-5.55800377E-03 1.59449507E-06-1.74188202E-10 2

-1.05495629E+08-2.78995511E+04-5.98780641E+02 2.04998733E+01 6.58417825E-03 3

-4.28895169E-05 2.72312755E-08-1.04038030E+08 1.65972702E+03 4

(B2O3)681 021221B 1362O 2043 G 100.0 3000.0 800.0 1

5.11511732E+03 8.65507829E+00-5.56608643E-03 1.59680227E-06-1.74439452E-10 2

-1.05651427E+08-2.79404854E+04-5.99742807E+02 2.05311640E+01 6.58916973E-03 3

-4.29457474E-05 2.72679753E-08-1.04191692E+08 1.66241031E+03 4

(B2O3)682 021221B 1364O 2046 G 100.0 3000.0 800.0 1

5.12250094E+03 8.66824880E+00-5.57470638E-03 1.59930594E-06-1.74714859E-10 2

-1.05807187E+08-2.79808943E+04-6.00602990E+02 2.05612958E+01 6.59909808E-03 3

-4.30092686E-05 2.73082481E-08-1.04345347E+08 1.66471967E+03 4

(B2O3)683 021221B 1366O 2049 G 100.0 3000.0 800.0 1

5.12997619E+03 8.68099616E+00-5.58291651E-03 1.60166336E-06-1.74972463E-10 2

-1.05962965E+08-2.80217076E+04-6.01562953E+02 2.05929098E+01 6.60300022E-03 3

-4.30642063E-05 2.73444290E-08-1.04499003E+08 1.66737037E+03 4

(B2O3)684 021221B 1368O 2052 G 100.0 3000.0 800.0 1

5.13760774E+03 8.69352382E+00-5.59102551E-03 1.60400256E-06-1.75228960E-10 2

-1.06118798E+08-2.80634240E+04-6.02424952E+02 2.06230469E+01 6.61298204E-03 3

-4.31280643E-05 2.73849947E-08-1.04652660E+08 1.66967080E+03 4

(B2O3)685 021221B 1370O 2055 G 100.0 3000.0 800.0 1

5.14519792E+03 8.70589658E+00-5.59886729E-03 1.60622729E-06-1.75470533E-10 2

-1.06274599E+08-2.81048447E+04-6.03182654E+02 2.06519910E+01 6.62649005E-03 3

-4.31961276E-05 2.74272688E-08-1.04806318E+08 1.67160565E+03 4

(B2O3)686 021221B 1372O 2058 G 100.0 3000.0 800.0 1

5.15262085E+03 8.71888992E+00-5.60730060E-03 1.60865901E-06-1.75736652E-10 2

-1.06430382E+08-2.81454781E+04-6.04176908E+02 2.06832642E+01 6.63273436E-03 3

-4.32550408E-05 2.74655969E-08-1.04959969E+08 1.67443457E+03 4

(B2O3)687 021221B 1374O 2061 G 100.0 3000.0 800.0 1

5.16009371E+03 8.73155906E+00-5.61540945E-03 1.61097694E-06-1.75989052E-10 2

-1.06586156E+08-2.81862772E+04-6.04992266E+02 2.07130610E+01 6.64302504E-03 3

-4.33187897E-05 2.75059612E-08-1.05113630E+08 1.67656526E+03 4

(B2O3)688 021221B 1376O 2064 G 100.0 3000.0 800.0 1

5.16783001E+03 8.74367943E+00-5.62306995E-03 1.61315188E-06-1.76225867E-10 2

-1.06742004E+08-2.82284349E+04-6.05893165E+02 2.07440172E+01 6.64965608E-03 3

-4.33776349E-05 2.75439674E-08-1.05267293E+08 1.67900006E+03 4

(B2O3)689 021221B 1378O 2067 G 100.0 3000.0 800.0 1

5.17520961E+03 8.75672920E+00-5.63153587E-03 1.61559511E-06-1.76493572E-10 2

-1.06897769E+08-2.82688324E+04-6.06796997E+02 2.07748384E+01 6.65587305E-03 3

-4.34349246E-05 2.75809371E-08-1.05420948E+08 1.68143961E+03 4

(B2O3)690 021221B 1380O 2070 G 100.0 3000.0 800.0 1

5.18284858E+03 8.76919335E+00-5.63956525E-03 1.61789372E-06-1.76743752E-10 2

-1.07053592E+08-2.83105365E+04-6.07564638E+02 2.08037709E+01 6.67016762E-03 3

-4.35045430E-05 2.76240612E-08-1.05574604E+08 1.68344450E+03 4

(B2O3)691 021221B 1382O 2073 G 100.0 3000.0 800.0 1

5.19037050E+03 8.78181049E+00-5.64767969E-03 1.62022117E-06-1.76997992E-10 2

-1.07209376E+08-2.83515330E+04-6.08581084E+02 2.08361106E+01 6.67258638E-03 3

-4.35587962E-05 2.76603997E-08-1.05728270E+08 1.68628433E+03 4

(B2O3)692 021221B 1384O 2076 G 100.0 3000.0 800.0 1

5.19786442E+03 8.79453140E+00-5.65587886E-03 1.62257938E-06-1.77256254E-10 2

-1.07365162E+08-2.83924659E+04-6.09472997E+02 2.08669561E+01 6.67907667E-03 3

-4.36171385E-05 2.76981385E-08-1.05881928E+08 1.68867576E+03 4

(B2O3)693 021221B 1386O 2079 G 100.0 3000.0 800.0 1

5.20547805E+03 8.80700838E+00-5.66387427E-03 1.62487073E-06-1.77506781E-10 2

-1.07520997E+08-2.84341062E+04-6.10212307E+02 2.08950694E+01 6.69658381E-03 3

-4.36916032E-05 2.77438384E-08-1.06035588E+08 1.69059619E+03 4

(B2O3)694 021221B 1388O 2082 G 100.0 3000.0 800.0 1

5.21285120E+03 8.82004471E+00-5.67235794E-03 1.62732758E-06-1.77776757E-10 2

-1.07676769E+08-2.84744721E+04-6.11047405E+02 2.09250456E+01 6.70538736E-03 3

-4.37521408E-05 2.77822543E-08-1.06189250E+08 1.69280502E+03 4

(B2O3)695 021221B 1390O 2085 G 100.0 3000.0 800.0 1

5.22046336E+03 8.83257292E+00-5.68037790E-03 1.62961011E-06-1.78024366E-10 2

-1.07832585E+08-2.85160194E+04-6.11941254E+02 2.09555360E+01 6.71494339E-03 3

-4.38162131E-05 2.78231720E-08-1.06342912E+08 1.69523226E+03 4

(B2O3)696 021221B 1392O 2088 G 100.0 3000.0 800.0 1

5.22797461E+03 8.84520153E+00-5.68852059E-03 1.63195912E-06-1.78282361E-10 2

-1.07988377E+08-2.85570051E+04-6.12820488E+02 2.09862859E+01 6.72148297E-03 3

-4.38743948E-05 2.78607277E-08-1.06496576E+08 1.69759671E+03 4

(B2O3)697 021221B 1394O 2091 G 100.0 3000.0 800.0 1

5.23551801E+03 8.85775883E+00-5.69650742E-03 1.63422424E-06-1.78527589E-10 2

-1.08144165E+08-2.85981846E+04-6.13743501E+02 2.10170551E+01 6.72975572E-03 3

-4.39365755E-05 2.79007340E-08-1.06650232E+08 1.70011637E+03 4

(B2O3)698 021221B 1396O 2094 G 100.0 3000.0 800.0 1

5.24285151E+03 8.87087168E+00-5.70501262E-03 1.63667429E-06-1.78795240E-10 2

-1.08299919E+08-2.86382748E+04-6.14648983E+02 2.10482784E+01 6.73387877E-03 3

-4.39905106E-05 2.79359590E-08-1.06803898E+08 1.70255984E+03 4

(B2O3)699 021221B 1398O 2097 G 100.0 3000.0 800.0 1

5.25058763E+03 8.88314161E+00-5.71293992E-03 1.63896064E-06-1.79046444E-10 2

-1.08455780E+08-2.86805249E+04-6.15485203E+02 2.10781268E+01 6.74481348E-03 3

-4.40555465E-05 2.79769842E-08-1.06957557E+08 1.70477676E+03 4

(B2O3)700 021221B 1400O 2100 G 100.0 3000.0 800.0 1

5.25820666E+03 8.89545783E+00-5.72073962E-03 1.64117889E-06-1.79287795E-10 2

-1.08611603E+08-2.87220617E+04-6.16311916E+02 2.11080002E+01 6.75495795E-03 3

-4.41189740E-05 2.80170904E-08-1.07111225E+08 1.70698060E+03 4

(B2O3)701 021221B 1402O 2103 G 100.0 3000.0 800.0 1

5.26585144E+03 8.90801508E+00-5.72886075E-03 1.64351710E-06-1.79544161E-10 2

-1.08767437E+08-2.87638278E+04-6.17250242E+02 2.11391453E+01 6.76201808E-03 3

-4.41793834E-05 2.80561983E-08-1.07264887E+08 1.70953894E+03 4

(B2O3)702 021221B 1404O 2106 G 100.0 3000.0 800.0 1

5.27322310E+03 8.92077639E+00-5.73698757E-03 1.64583500E-06-1.79796701E-10 2

-1.08923188E+08-2.88040841E+04-6.18075102E+02 2.11689956E+01 6.77116084E-03 3

-4.42406718E-05 2.80951039E-08-1.07418549E+08 1.71172138E+03 4

(B2O3)703 021221B 1406O 2109 G 100.0 3000.0 800.0 1

5.28080456E+03 8.93339934E+00-5.74515843E-03 1.64818773E-06-1.80053995E-10 2

-1.09079005E+08-2.88454837E+04-6.19000906E+02 2.12002931E+01 6.77646164E-03 3

-4.42976091E-05 2.81322058E-08-1.07572213E+08 1.71423235E+03 4

(B2O3)704 021221B 1408O 2112 G 100.0 3000.0 800.0 1

5.28835884E+03 8.94603856E+00-5.75332891E-03 1.65054235E-06-1.80312060E-10 2

-1.09234831E+08-2.88867776E+04-6.19917277E+02 2.12306601E+01 6.78633584E-03 3

-4.43620000E-05 2.81732405E-08-1.07725886E+08 1.71676776E+03 4

(B2O3)705 021221B 1410O 2115 G 100.0 3000.0 800.0 1

5.29588305E+03 8.95879812E+00-5.76153503E-03 1.65289829E-06-1.80569901E-10 2

-1.09390640E+08-2.89279484E+04-6.20822372E+02 2.12611615E+01 6.79487020E-03 3

-4.44234140E-05 2.82124654E-08-1.07879543E+08 1.71923347E+03 4

(B2O3)706 021221B 1412O 2118 G 100.0 3000.0 800.0 1

5.30324937E+03 8.97176634E+00-5.76986019E-03 1.65527486E-06-1.80827912E-10 2

-1.09546391E+08-2.89681634E+04-6.21762745E+02 2.12927820E+01 6.79830512E-03 3

-4.44772456E-05 2.82479423E-08-1.08033211E+08 1.72179403E+03 4

(B2O3)707 021221B 1414O 2121 G 100.0 3000.0 800.0 1

5.31090734E+03 8.98421668E+00-5.77792311E-03 1.65760529E-06-1.81084192E-10 2

-1.09702236E+08-2.90100126E+04-6.22502715E+02 2.13213109E+01 6.81424863E-03 3

-4.45495223E-05 2.82925342E-08-1.08186879E+08 1.72367740E+03 4

(B2O3)708 021221B 1416O 2124 G 100.0 3000.0 800.0 1

5.31831256E+03 8.99714064E+00-5.78631417E-03 1.66002763E-06-1.81349385E-10 2

-1.09858013E+08-2.90504688E+04-6.23428859E+02 2.13527049E+01 6.81796482E-03 3

-4.46031512E-05 2.83276813E-08-1.08340549E+08 1.72620260E+03 4

(B2O3)709 021221B 1418O 2127 G 100.0 3000.0 800.0 1

5.32603338E+03 9.00928040E+00-5.79396621E-03 1.66219264E-06-1.81584580E-10 2

-1.10013863E+08-2.90925750E+04-6.24317289E+02 2.13831324E+01 6.82696389E-03 3

-4.46657646E-05 2.83677023E-08-1.08494211E+08 1.72862063E+03 4

(B2O3)710 021221B 1420O 2130 G 100.0 3000.0 800.0 1

5.33353202E+03 9.02211592E+00-5.80228506E-03 1.66458208E-06-1.81844929E-10 2

-1.10169652E+08-2.91334974E+04-6.25237426E+02 2.14143861E+01 6.83305792E-03 3

-4.47243698E-05 2.84057457E-08-1.08647883E+08 1.73111525E+03 4

(B2O3)711 021221B 1422O 2133 G 100.0 3000.0 800.0 1

5.34093385E+03 9.03513468E+00-5.81075375E-03 1.66703999E-06-1.82115876E-10 2

-1.10325450E+08-2.91740849E+04-6.26079246E+02 2.14438353E+01 6.84467294E-03 3

-4.47894336E-05 2.84465316E-08-1.08801547E+08 1.73338179E+03 4

(B2O3)712 021221B 1424O 2136 G 100.0 3000.0 800.0 1

5.34851692E+03 9.04759917E+00-5.81870585E-03 1.66930761E-06-1.82362724E-10 2

-1.10481263E+08-2.92154983E+04-6.26948058E+02 2.14738349E+01 6.85559682E-03 3

-4.48552222E-05 2.84882475E-08-1.08955213E+08 1.73571544E+03 4

(B2O3)713 021221B 1426O 2139 G 100.0 3000.0 800.0 1

5.35589933E+03 9.06053044E+00-5.82700265E-03 1.67167335E-06-1.82619248E-10 2

-1.10637027E+08-2.92557923E+04-6.27813507E+02 2.15042464E+01 6.86407788E-03 3

-4.49168813E-05 2.85278019E-08-1.09108889E+08 1.73805233E+03 4

(B2O3)714 021221B 1428O 2142 G 100.0 3000.0 800.0 1

5.36339355E+03 9.07330122E+00-5.83532153E-03 1.67409088E-06-1.82886286E-10 2

-1.10792845E+08-2.92968069E+04-6.28602998E+02 2.15333811E+01 6.87655017E-03 3

-4.49832593E-05 2.85693063E-08-1.09262557E+08 1.74013063E+03 4

(B2O3)715 021221B 1430O 2145 G 100.0 3000.0 800.0 1

5.37116306E+03 9.08543849E+00-5.84308961E-03 1.67631729E-06-1.83129907E-10 2

-1.10948712E+08-2.93391808E+04-6.29456944E+02 2.15635270E+01 6.88660513E-03 3

-4.50471301E-05 2.86097158E-08-1.09416226E+08 1.74240857E+03 4

(B2O3)716 021221B 1432O 2148 G 100.0 3000.0 800.0 1

5.37863768E+03 9.09824515E+00-5.85132146E-03 1.67866962E-06-1.83385725E-10 2

-1.11104504E+08-2.93800224E+04-6.30396333E+02 2.15948443E+01 6.89200703E-03 3

-4.51044042E-05 2.86470788E-08-1.09569897E+08 1.74496409E+03 4

(B2O3)717 021221B 1434O 2151 G 100.0 3000.0 800.0 1

5.38619452E+03 9.11071014E+00-5.85928533E-03 1.68094616E-06-1.83634000E-10 2

-1.11260313E+08-2.94212207E+04-6.31254311E+02 2.16253276E+01 6.89941682E-03 3

-4.51637064E-05 2.86851345E-08-1.09723568E+08 1.74726843E+03 4

(B2O3)718 021221B 1436O 2154 G 100.0 3000.0 800.0 1

5.39373755E+03 9.12335894E+00-5.86741601E-03 1.68327004E-06-1.83886713E-10 2

-1.11416110E+08-2.94624150E+04-6.32195423E+02 2.16562579E+01 6.90772027E-03 3

-4.52265460E-05 2.87256650E-08-1.09877232E+08 1.74984826E+03 4

(B2O3)719 021221B 1438O 2157 G 100.0 3000.0 800.0 1

5.40110045E+03 9.13635583E+00-5.87575678E-03 1.68565558E-06-1.84146452E-10 2

-1.11571878E+08-2.95026505E+04-6.33103639E+02 2.16874398E+01 6.91214068E-03 3

-4.52809738E-05 2.87611581E-08-1.10030906E+08 1.75230548E+03 4

(B2O3)720 021221B 1440O 2160 G 100.0 3000.0 800.0 1

5.40886318E+03 9.14846952E+00-5.88349998E-03 1.68787127E-06-1.84388446E-10 2

-1.11727749E+08-2.95449884E+04-6.33839502E+02 2.17160702E+01 6.92746840E-03 3

-4.53521319E-05 2.88050743E-08-1.10184581E+08 1.75418186E+03 4

(B2O3)721 021221B 1442O 2163 G 100.0 3000.0 800.0 1

5.41641065E+03 9.16111369E+00-5.89166043E-03 1.69021749E-06-1.84645299E-10 2

-1.11883576E+08-2.95862880E+04-6.34849719E+02 2.17475788E+01 6.93284365E-03 3

-4.54097930E-05 2.88427255E-08-1.10338249E+08 1.75702364E+03 4

(B2O3)722 021221B 1444O 2166 G 100.0 3000.0 800.0 1

5.42381695E+03 9.17402753E+00-5.90000978E-03 1.69262052E-06-1.84908155E-10 2

-1.12039353E+08-2.96267110E+04-6.35723743E+02 2.17783709E+01 6.93913450E-03 3

-4.54675466E-05 2.88800801E-08-1.10491927E+08 1.75937867E+03 4

(B2O3)723 021221B 1446O 2169 G 100.0 3000.0 800.0 1

5.43136070E+03 9.18672335E+00-5.90817063E-03 1.69496224E-06-1.85164165E-10 2

-1.12195166E+08-2.96679367E+04-6.36654952E+02 2.18093266E+01 6.94656948E-03 3

-4.55281902E-05 2.89192144E-08-1.10645596E+08 1.76192214E+03 4

(B2O3)724 021221B 1448O 2172 G 100.0 3000.0 800.0 1

5.43870663E+03 9.19966545E+00-5.91646906E-03 1.69733570E-06-1.85422527E-10 2

-1.12350922E+08-2.97080865E+04-6.37457758E+02 2.18386582E+01 6.95863834E-03 3

-4.55945153E-05 2.89608888E-08-1.10799267E+08 1.76404496E+03 4

(B2O3)725 021221B 1450O 2175 G 100.0 3000.0 800.0 1

5.44636477E+03 9.21208945E+00-5.92451082E-03 1.69965568E-06-1.85677009E-10 2

-1.12506777E+08-2.97499249E+04-6.38336234E+02 2.18692597E+01 6.96589984E-03 3

-4.56534381E-05 2.89986150E-08-1.10952939E+08 1.76639439E+03 4

(B2O3)726 021221B 1452O 2178 G 100.0 3000.0 800.0 1

5.45396186E+03 9.22463928E+00-5.93256494E-03 1.70196216E-06-1.85928760E-10 2

-1.12662606E+08-2.97914202E+04-6.39140082E+02 2.18986042E+01 6.97904122E-03 3

-4.57219609E-05 2.90414900E-08-1.11106613E+08 1.76850987E+03 4

(B2O3)727 021221B 1454O 2181 G 100.0 3000.0 800.0 1

5.46139966E+03 9.23746811E+00-5.94083122E-03 1.70433067E-06-1.86187018E-10 2

-1.12818396E+08-2.98320757E+04-6.40071707E+02 2.19296069E+01 6.98552408E-03 3

-4.57808667E-05 2.90797163E-08-1.11260287E+08 1.77105845E+03 4

(B2O3)728 021221B 1456O 2184 G 100.0 3000.0 800.0 1

5.46891379E+03 9.25013831E+00-5.94899975E-03 1.70668944E-06-1.86446504E-10 2

-1.12974213E+08-2.98731300E+04-6.40878050E+02 2.19593433E+01 6.99531172E-03 3

-4.58428859E-05 2.91188540E-08-1.11413963E+08 1.77317726E+03 4

(B2O3)729 021221B 1458O 2187 G 100.0 3000.0 800.0 1

5.47643226E+03 9.26262349E+00-5.95691112E-03 1.70892525E-06-1.86687604E-10 2

-1.13129999E+08-2.99140830E+04-6.41787556E+02 2.19903058E+01 7.00218639E-03 3

-4.59028182E-05 2.91577075E-08-1.11567640E+08 1.77565541E+03 4

(B2O3)730 021221B 1460O 2190 G 100.0 3000.0 800.0 1

5.48420924E+03 9.27493688E+00-5.96493711E-03 1.71125916E-06-1.86945708E-10 2

-1.13285902E+08-2.99566068E+04-6.42822577E+02 2.20221965E+01 7.00714204E-03 3

-4.59605557E-05 2.91955316E-08-1.11721318E+08 1.77857307E+03 4

(B2O3)731 021221B 1462O 2193 G 100.0 3000.0 800.0 1

5.49174462E+03 9.28766261E+00-5.97314575E-03 1.71361969E-06-1.87204125E-10 2

-1.13441724E+08-2.99978126E+04-6.43679054E+02 2.20525383E+01 7.01498319E-03 3

-4.60196694E-05 2.92331197E-08-1.11874988E+08 1.78085080E+03 4

(B2O3)732 021221B 1464O 2196 G 100.0 3000.0 800.0 1

5.49941067E+03 9.29991894E+00-5.98096106E-03 1.71584905E-06-1.87447077E-10 2

-1.13597568E+08-3.00396120E+04-6.44519417E+02 2.20826029E+01 7.02507525E-03 3

-4.60839025E-05 2.92739604E-08-1.12028668E+08 1.78307252E+03 4

(B2O3)733 021221B 1466O 2199 G 100.0 3000.0 800.0 1

5.50664169E+03 9.31327238E+00-5.98959474E-03 1.71832509E-06-1.87716445E-10 2

-1.13753304E+08-3.00792072E+04-6.45387432E+02 2.21130352E+01 7.03249833E-03 3

-4.61427326E-05 2.93116509E-08-1.12182340E+08 1.78539080E+03 4

(B2O3)734 021221B 1468O 2202 G 100.0 3000.0 800.0 1

5.51433588E+03 9.32550133E+00-5.99741478E-03 1.72056233E-06-1.87960847E-10 2

-1.13909162E+08-3.01211739E+04-6.46173037E+02 2.21421360E+01 7.04654966E-03 3

-4.62128142E-05 2.93553807E-08-1.12336023E+08 1.78745129E+03 4

(B2O3)735 021221B 1470O 2205 G 100.0 3000.0 800.0 1

5.52188574E+03 9.33805970E+00-6.00543456E-03 1.72285079E-06-1.88210168E-10 2

-1.14064989E+08-3.01624294E+04-6.47103110E+02 2.21728025E+01 7.05463584E-03 3

-4.62740432E-05 2.93946981E-08-1.12489698E+08 1.79002913E+03 4

(B2O3)736 021221B 1472O 2208 G 100.0 3000.0 800.0 1

5.52948698E+03 9.35065256E+00-6.01356106E-03 1.72519414E-06-1.88467621E-10 2

-1.14220829E+08-3.02039552E+04-6.48058272E+02 2.22041417E+01 7.06055370E-03 3

-4.63325388E-05 2.94328208E-08-1.12643373E+08 1.79266136E+03 4

(B2O3)737 021221B 1474O 2211 G 100.0 3000.0 800.0 1

5.53692025E+03 9.36351602E+00-6.02186526E-03 1.72757495E-06-1.88726750E-10 2

-1.14376618E+08-3.02445830E+04-6.48826293E+02 2.22333643E+01 7.07226189E-03 3

-4.63970881E-05 2.94730263E-08-1.12797050E+08 1.79464391E+03 4

(B2O3)738 021221B 1476O 2214 G 100.0 3000.0 800.0 1

5.54448087E+03 9.37617026E+00-6.03005727E-03 1.72993494E-06-1.88985123E-10 2

-1.14532439E+08-3.02858662E+04-6.49784796E+02 2.22649226E+01 7.07725193E-03 3

-4.64542906E-05 2.95105006E-08-1.12950728E+08 1.79726771E+03 4

(B2O3)739 021221B 1478O 2217 G 100.0 3000.0 800.0 1

5.55205180E+03 9.38867444E+00-6.03801430E-03 1.73219999E-06-1.89231534E-10 2

-1.14688266E+08-3.03272028E+04-6.50570217E+02 2.22941054E+01 7.09027425E-03 3

-4.65220887E-05 2.95528788E-08-1.13104408E+08 1.79932648E+03 4

(B2O3)740 021221B 1480O 2220 G 100.0 3000.0 800.0 1

5.55953710E+03 9.40133068E+00-6.04621036E-03 1.73457111E-06-1.89492134E-10 2

-1.14844054E+08-3.03680144E+04-6.51467054E+02 2.23250319E+01 7.09708247E-03 3

-4.65819635E-05 2.95917614E-08-1.13258088E+08 1.80174367E+03 4

(B2O3)741 021221B 1482O 2223 G 100.0 3000.0 800.0 1

5.56702553E+03 9.41418739E+00-6.05452509E-03 1.73696853E-06-1.89755183E-10 2

-1.14999878E+08-3.04089681E+04-6.52469919E+02 2.23571302E+01 7.09903176E-03 3

-4.66334525E-05 2.96259685E-08-1.13411769E+08 1.80454015E+03 4

(B2O3)742 021221B 1484O 2226 G 100.0 3000.0 800.0 1

5.57481170E+03 9.42628770E+00-6.06224769E-03 1.73916143E-06-1.89992837E-10 2

-1.15155764E+08-3.04514256E+04-6.53247004E+02 2.23859392E+01 7.11495359E-03 3

-4.67067112E-05 2.96713732E-08-1.13565452E+08 1.80659477E+03 4

(B2O3)743 021221B 1486O 2229 G 100.0 3000.0 800.0 1

5.58223094E+03 9.43913248E+00-6.07051103E-03 1.74153807E-06-1.90253141E-10 2

-1.15311558E+08-3.04920248E+04-6.54108845E+02 2.24163308E+01 7.12193208E-03 3

-4.67643126E-05 2.97082163E-08-1.13719127E+08 1.80887344E+03 4

(B2O3)744 021221B 1488O 2232 G 100.0 3000.0 800.0 1

5.58975646E+03 9.45177585E+00-6.07865062E-03 1.74387152E-06-1.90507508E-10 2

-1.15467371E+08-3.05331007E+04-6.54967452E+02 2.24466480E+01 7.13103065E-03 3

-4.68270632E-05 2.97483323E-08-1.13872812E+08 1.81116063E+03 4

(B2O3)745 021221B 1490O 2235 G 100.0 3000.0 800.0 1

5.59745243E+03 9.46424851E+00-6.08671722E-03 1.74619428E-06-1.90761942E-10 2

-1.15623243E+08-3.05751604E+04-6.55869193E+02 2.24770551E+01 7.14103930E-03 3

-4.68916283E-05 2.97894074E-08-1.14026488E+08 1.81362500E+03 4

(B2O3)746 021221B 1492O 2238 G 100.0 3000.0 800.0 1

5.60484948E+03 9.47703954E+00-6.09493384E-03 1.74855267E-06-1.91019986E-10 2

-1.15779026E+08-3.06155332E+04-6.56668375E+02 2.25069080E+01 7.14984584E-03 3

-4.69521808E-05 2.98278756E-08-1.14180175E+08 1.81571518E+03 4

(B2O3)747 021221B 1494O 2241 G 100.0 3000.0 800.0 1

5.61235861E+03 9.48993801E+00-6.10329415E-03 1.75096437E-06-1.91284489E-10 2

-1.15934854E+08-3.06566385E+04-6.57542217E+02 2.25371162E+01 7.15956734E-03 3

-4.70152738E-05 2.98678974E-08-1.14333854E+08 1.81806698E+03 4

(B2O3)748 021221B 1496O 2244 G 100.0 3000.0 800.0 1

5.61988057E+03 9.50257171E+00-6.11140769E-03 1.75329168E-06-1.91538628E-10 2

-1.16090659E+08-3.06976852E+04-6.58460920E+02 2.25681376E+01 7.16623460E-03 3

-4.70745852E-05 2.99062902E-08-1.14487535E+08 1.82056499E+03 4

(B2O3)749 021221B 1498O 2247 G 100.0 3000.0 800.0 1

5.62750683E+03 9.51488955E+00-6.11927461E-03 1.75553580E-06-1.91783157E-10 2

-1.16246500E+08-3.07393458E+04-6.59359274E+02 2.25988866E+01 7.17337236E-03 3

-4.71342108E-05 2.99447516E-08-1.14641216E+08 1.82293726E+03 4

(B2O3)750 021221B 1500O 2250 G 100.0 3000.0 800.0 1

5.63496778E+03 9.52783848E+00-6.12770817E-03 1.75797772E-06-1.92051343E-10 2

-1.16402309E+08-3.07800856E+04-6.60263647E+02 2.26299952E+01 7.17949332E-03 3

-4.71924734E-05 2.99825777E-08-1.14794908E+08 1.82539063E+03 4

(B2O3)751 021221B 1502O 2253 G 100.0 3000.0 800.0 1

5.64254696E+03 9.54027349E+00-6.13563473E-03 1.76024168E-06-1.92298424E-10 2

-1.16558131E+08-3.08214739E+04-6.61169161E+02 2.26608310E+01 7.18610382E-03 3

-4.72509369E-05 3.00203013E-08-1.14948582E+08 1.82782269E+03 4

(B2O3)752 021221B 1504O 2256 G 100.0 3000.0 800.0 1

5.64999919E+03 9.55313170E+00-6.14393285E-03 1.76262240E-06-1.92558041E-10 2

-1.16713945E+08-3.08622414E+04-6.61936838E+02 2.26897448E+01 7.19942423E-03 3

-4.73182083E-05 3.00620376E-08-1.15102266E+08 1.82982660E+03 4

(B2O3)753 021221B 1506O 2259 G 100.0 3000.0 800.0 1

5.65757735E+03 9.56573440E+00-6.15206284E-03 1.76495519E-06-1.92812621E-10 2

-1.16869770E+08-3.09035762E+04-6.62828647E+02 2.27206616E+01 7.20652537E-03 3

-4.73781416E-05 3.01007259E-08-1.15255952E+08 1.83222406E+03 4

(B2O3)754 021221B 1508O 2262 G 100.0 3000.0 800.0 1

5.66520442E+03 9.57808795E+00-6.15998004E-03 1.76722808E-06-1.93061772E-10 2

-1.17025614E+08-3.09451751E+04-6.63763628E+02 2.27517482E+01 7.21327538E-03 3

-4.74381213E-05 3.01396902E-08-1.15409639E+08 1.83478808E+03 4

(B2O3)755 021221B 1510O 2265 G 100.0 3000.0 800.0 1

5.67266247E+03 9.59080753E+00-6.16810432E-03 1.76954334E-06-1.93313266E-10 2

-1.17181410E+08-3.09858467E+04-6.64677301E+02 2.27831479E+01 7.21712484E-03 3

-4.74921991E-05 3.01751754E-08-1.15563327E+08 1.83726765E+03 4

(B2O3)756 021221B 1512O 2268 G 100.0 3000.0 800.0 1

5.68021202E+03 9.60346897E+00-6.17624419E-03 1.77187355E-06-1.93567066E-10 2

-1.17337234E+08-3.10271114E+04-6.65510780E+02 2.28127890E+01 7.22925468E-03 3

-4.75593184E-05 3.02173649E-08-1.15717007E+08 1.83947656E+03 4

(B2O3)757 021221B 1514O 2271 G 100.0 3000.0 800.0 1

5.68769924E+03 9.61628095E+00-6.18452499E-03 1.77425197E-06-1.93826855E-10 2

-1.17493054E+08-3.10680313E+04-6.66374494E+02 2.28430683E+01 7.23822140E-03 3

-4.76212483E-05 3.02568134E-08-1.15870697E+08 1.84179558E+03 4

(B2O3)758 021221B 1516O 2274 G 100.0 3000.0 800.0 1

5.69520632E+03 9.62904256E+00-6.19276517E-03 1.77662852E-06-1.94087618E-10 2

-1.17648878E+08-3.11090901E+04-6.67200098E+02 2.28723757E+01 7.25176767E-03 3

-4.76907952E-05 3.03004432E-08-1.16024379E+08 1.84400980E+03 4

(B2O3)759 021221B 1518O 2277 G 100.0 3000.0 800.0 1

5.70285578E+03 9.64135057E+00-6.20059815E-03 1.77885815E-06-1.94330273E-10 2

-1.17804739E+08-3.11508761E+04-6.68042668E+02 2.29023948E+01 7.26087511E-03 3

-4.77520381E-05 3.03392123E-08-1.16178062E+08 1.84623771E+03 4

(B2O3)760 021221B 1520O 2280 G 100.0 3000.0 800.0 1

5.71019978E+03 9.65430291E+00-6.20893664E-03 1.78125028E-06-1.94591143E-10 2

-1.17960508E+08-3.11909816E+04-6.68944120E+02 2.29327341E+01 7.27055118E-03 3

-4.78163966E-05 3.03804136E-08-1.16331755E+08 1.84872202E+03 4

(B2O3)761 021221B 1522O 2283 G 100.0 3000.0 800.0 1

5.71770784E+03 9.66711182E+00-6.21723619E-03 1.78364437E-06-1.94853602E-10 2

-1.18116343E+08-3.12320579E+04-6.69925429E+02 2.29640976E+01 7.27615341E-03 3

-4.78739642E-05 3.04178684E-08-1.16485440E+08 1.85147296E+03 4

(B2O3)762 021221B 1524O 2286 G 100.0 3000.0 800.0 1

5.72546888E+03 9.67924225E+00-6.22495210E-03 1.78583985E-06-1.95092465E-10 2

-1.18272234E+08-3.12744024E+04-6.70797558E+02 2.29943654E+01 7.28560846E-03 3

-4.79368751E-05 3.04578352E-08-1.16639126E+08 1.85382754E+03 4

(B2O3)763 021221B 1526O 2289 G 100.0 3000.0 800.0 1

5.73288917E+03 9.69212600E+00-6.23327392E-03 1.78823111E-06-1.95353635E-10 2

-1.18428024E+08-3.13149257E+04-6.71717241E+02 2.30256943E+01 7.29016324E-03 3

-4.79923770E-05 3.04941565E-08-1.16792814E+08 1.85631151E+03 4

(B2O3)764 021221B 1528O 2292 G 100.0 3000.0 800.0 1

5.74041973E+03 9.70494182E+00-6.24158000E-03 1.79062439E-06-1.95615596E-10 2

-1.18583847E+08-3.13560717E+04-6.72609761E+02 2.30562222E+01 7.29974975E-03 3

-4.80566789E-05 3.05352765E-08-1.16946502E+08 1.85872034E+03 4

(B2O3)765 021221B 1530O 2295 G 100.0 3000.0 800.0 1

5.74770353E+03 9.71794883E+00-6.24993968E-03 1.79302561E-06-1.95878254E-10 2

-1.18739610E+08-3.13958878E+04-6.73425777E+02 2.30862239E+01 7.30717873E-03 3

-4.81143897E-05 3.05720663E-08-1.17100192E+08 1.86086518E+03 4

(B2O3)766 021221B 1532O 2298 G 100.0 3000.0 800.0 1

5.75541230E+03 9.73020387E+00-6.25778442E-03 1.79527226E-06-1.96124003E-10 2

-1.18895480E+08-3.14379270E+04-6.74313862E+02 2.31167859E+01 7.31615385E-03 3

-4.81776111E-05 3.06126072E-08-1.17253882E+08 1.86326132E+03 4

(B2O3)767 021221B 1534O 2301 G 100.0 3000.0 800.0 1

5.76306902E+03 9.74270467E+00-6.26583948E-03 1.79757778E-06-1.96374783E-10 2

-1.19051344E+08-3.14797830E+04-6.75104295E+02 2.31457120E+01 7.33124836E-03 3

-4.82489827E-05 3.06568239E-08-1.17407564E+08 1.86534398E+03 4

(B2O3)768 021221B 1536O 2304 G 100.0 3000.0 800.0 1

5.77054928E+03 9.75536171E+00-6.27389727E-03 1.79987344E-06-1.96624583E-10 2

-1.19207158E+08-3.15206139E+04-6.76057832E+02 2.31772721E+01 7.33497802E-03 3

-4.83032082E-05 3.06924781E-08-1.17561257E+08 1.86796500E+03 4

(B2O3)769 021221B 1538O 2307 G 100.0 3000.0 800.0 1

5.77817068E+03 9.76785915E+00-6.28194221E-03 1.80218473E-06-1.96877656E-10 2

-1.19363008E+08-3.15622491E+04-6.76889709E+02 2.32071077E+01 7.34577759E-03 3

-4.83678653E-05 3.07332652E-08-1.17714942E+08 1.87016275E+03 4

(B2O3)770 021221B 1540O 2310 G 100.0 3000.0 800.0 1

5.78563924E+03 9.78056088E+00-6.29010414E-03 1.80452674E-06-1.97133616E-10 2

-1.19518810E+08-3.16029755E+04-6.77776578E+02 2.32379280E+01 7.35261150E-03 3

-4.84271569E-05 3.07716313E-08-1.17868636E+08 1.87255947E+03 4

(B2O3)771 021221B 1542O 2313 G 100.0 3000.0 800.0 1

5.79311228E+03 9.79331945E+00-6.29834244E-03 1.80689427E-06-1.97392316E-10 2

-1.19674621E+08-3.16438002E+04-6.78721254E+02 2.32693735E+01 7.35687386E-03 3

-4.84823050E-05 3.08077880E-08-1.18022323E+08 1.87514126E+03 4

(B2O3)772 021221B 1544O 2316 G 100.0 3000.0 800.0 1

5.80076309E+03 9.80576298E+00-6.30632959E-03 1.80918514E-06-1.97642649E-10 2

-1.19830486E+08-3.16855591E+04-6.79473041E+02 2.32983791E+01 7.37059215E-03 3

-4.85509072E-05 3.08504056E-08-1.18176020E+08 1.87706440E+03 4

(B2O3)773 021221B 1546O 2319 G 100.0 3000.0 800.0 1

5.80837128E+03 9.81822803E+00-6.31436138E-03 1.81149470E-06-1.97895716E-10 2

-1.19986345E+08-3.17271610E+04-6.80300376E+02 2.33275941E+01 7.38415713E-03 3

-4.86199863E-05 3.08935233E-08-1.18329709E+08 1.87928233E+03 4

(B2O3)774 021221B 1548O 2322 G 100.0 3000.0 800.0 1

5.81585367E+03 9.83105588E+00-6.32266191E-03 1.81389012E-06-1.98158659E-10 2

-1.20142168E+08-3.17680629E+04-6.81227117E+02 2.33587777E+01 7.38955311E-03 3

-4.86767304E-05 3.09304629E-08-1.18483398E+08 1.88180834E+03 4

(B2O3)775 021221B 1550O 2325 G 100.0 3000.0 800.0 1

5.82334675E+03 9.84371032E+00-6.33075238E-03 1.81619104E-06-1.98407835E-10 2

-1.20297983E+08-3.18089798E+04-6.82247729E+02 2.33905993E+01 7.39387341E-03 3

-4.87331644E-05 3.09675902E-08-1.18637089E+08 1.88469377E+03 4

(B2O3)776 021221B 1552O 2328 G 100.0 3000.0 800.0 1

5.83089637E+03 9.85631202E+00-6.33889781E-03 1.81854611E-06-1.98667073E-10 2

-1.20453819E+08-3.18502129E+04-6.83135294E+02 2.34212050E+01 7.40164177E-03 3

-4.87936917E-05 3.10065031E-08-1.18790781E+08 1.88708495E+03 4

(B2O3)777 021221B 1554O 2331 G 100.0 3000.0 800.0 1

5.83840593E+03 9.86913839E+00-6.34717985E-03 1.82092232E-06-1.98926189E-10 2

-1.20609649E+08-3.18912703E+04-6.83969718E+02 2.34511550E+01 7.41204250E-03 3

-4.88577242E-05 3.10469895E-08-1.18944474E+08 1.88928788E+03 4

(B2O3)778 021221B 1556O 2334 G 100.0 3000.0 800.0 1

5.84587443E+03 9.88178895E+00-6.35525955E-03 1.82322400E-06-1.99176071E-10 2

-1.20765464E+08-3.19320758E+04-6.84754187E+02 2.34802873E+01 7.42456751E-03 3

-4.89242781E-05 3.10885722E-08-1.19098167E+08 1.89133914E+03 4

(B2O3)779 021221B 1558O 2337 G 100.0 3000.0 800.0 1

5.85331344E+03 9.89478273E+00-6.36370322E-03 1.82565989E-06-1.99442889E-10 2

-1.20921275E+08-3.19727343E+04-6.85619321E+02 2.35108367E+01 7.43235281E-03 3

-4.89843477E-05 3.11270650E-08-1.19251862E+08 1.89365147E+03 4

(B2O3)780 021221B 1560O 2340 G 100.0 3000.0 800.0 1

5.86093218E+03 9.90710851E+00-6.37156813E-03 1.82791319E-06-1.99689535E-10 2

-1.21077122E+08-3.20142563E+04-6.86564297E+02 2.35423244E+01 7.43692407E-03 3

-4.90405799E-05 3.11639755E-08-1.19405558E+08 1.89624204E+03 4

(B2O3)781 021221B 1562O 2343 G 100.0 3000.0 800.0 1

5.86867089E+03 9.91932751E+00-6.37938948E-03 1.83014646E-06-1.99932806E-10 2

-1.21233001E+08-3.20564338E+04-6.87467809E+02 2.35732406E+01 7.44468800E-03 3

-4.91020657E-05 3.12036102E-08-1.19559255E+08 1.89868060E+03 4

(B2O3)782 021221B 1564O 2346 G 100.0 3000.0 800.0 1

5.87601543E+03 9.93243584E+00-6.38790018E-03 1.83260405E-06-2.00202308E-10 2

-1.21388799E+08-3.20967267E+04-6.88314695E+02 2.36031537E+01 7.45369268E-03 3

-4.91625436E-05 3.12418192E-08-1.19712944E+08 1.90089634E+03 4

(B2O3)783 021221B 1566O 2349 G 100.0 3000.0 800.0 1

5.88352263E+03 9.94509377E+00-6.39604017E-03 1.83493053E-06-2.00455142E-10 2

-1.21544613E+08-3.21376496E+04-6.89239710E+02 2.36342755E+01 7.46038073E-03 3

-4.92224974E-05 3.12807722E-08-1.19866643E+08 1.90343794E+03 4

(B2O3)784 021221B 1568O 2352 G 100.0 3000.0 800.0 1

5.89123869E+03 9.95739150E+00-6.40397004E-03 1.83722655E-06-2.00708777E-10 2

-1.21700497E+08-3.21797799E+04-6.90173335E+02 2.36654227E+01 7.46669803E-03 3

-4.92812124E-05 3.13188231E-08-1.20020334E+08 1.90597882E+03 4

(B2O3)785 021221B 1570O 2355 G 100.0 3000.0 800.0 1

5.89874594E+03 9.97000125E+00-6.41204886E-03 1.83953643E-06-2.00960555E-10 2

-1.21856336E+08-3.22207918E+04-6.91020454E+02 2.36953035E+01 7.47666453E-03 3

-4.93443109E-05 3.13587998E-08-1.20174035E+08 1.90826498E+03 4

(B2O3)786 021221B 1572O 2358 G 100.0 3000.0 800.0 1

5.90621318E+03 9.98283961E+00-6.42038888E-03 1.84194645E-06-2.01224975E-10 2

-1.22012161E+08-3.22616402E+04-6.91830178E+02 2.37248914E+01 7.48759104E-03 3

-4.94085778E-05 3.13992709E-08-1.20327728E+08 1.91038817E+03 4

(B2O3)787 021221B 1574O 2361 G 100.0 3000.0 800.0 1

5.91388234E+03 9.99514407E+00-6.42818415E-03 1.84414891E-06-2.01462681E-10 2

-1.22168020E+08-3.23034827E+04-6.92680026E+02 2.37546498E+01 7.49990013E-03 3

-4.94765518E-05 3.14420494E-08-1.20481421E+08 1.91266723E+03 4

(B2O3)788 021221B 1576O 2364 G 100.0 3000.0 800.0 1

5.92122330E+03 1.00081724E+01-6.43654357E-03 1.84655034E-06-2.01725705E-10 2

-1.22323803E+08-3.23436207E+04-6.93605766E+02 2.37859114E+01 7.50441175E-03 3

-4.95316068E-05 3.14780667E-08-1.20635116E+08 1.91517449E+03 4

(B2O3)789 021221B 1578O 2367 G 100.0 3000.0 800.0 1

5.92885314E+03 1.00206621E+01-6.44459199E-03 1.84885548E-06-2.01976858E-10 2

-1.22479669E+08-3.23852924E+04-6.94424443E+02 2.38152355E+01 7.51793384E-03 3

-4.96010007E-05 3.15214819E-08-1.20788812E+08 1.91737288E+03 4

(B2O3)790 021221B 1580O 2370 G 100.0 3000.0 800.0 1

5.93643874E+03 1.00331100E+01-6.45257947E-03 1.85114606E-06-2.02227365E-10 2

-1.22635510E+08-3.24266663E+04-6.95356842E+02 2.38464924E+01 7.52347373E-03 3

-4.96586429E-05 3.15590704E-08-1.20942508E+08 1.91991635E+03 4

(B2O3)791 021221B 1582O 2373 G 100.0 3000.0 800.0 1

5.94378213E+03 1.00462474E+01-6.46112570E-03 1.85361565E-06-2.02497985E-10 2

-1.22791312E+08-3.24668875E+04-6.96167926E+02 2.38762417E+01 7.53284169E-03 3

-4.97195460E-05 3.15974881E-08-1.21096206E+08 1.92203653E+03 4

(B2O3)792 021221B 1584O 2376 G 100.0 3000.0 800.0 1

5.95159631E+03 1.00584347E+01-6.46897117E-03 1.85587588E-06-2.02746428E-10 2

-1.22947232E+08-3.25095371E+04-6.96991440E+02 2.39061005E+01 7.54399132E-03 3

-4.97847631E-05 3.16384799E-08-1.21249905E+08 1.92420414E+03 4

(B2O3)793 021221B 1586O 2379 G 100.0 3000.0 800.0 1

5.95911550E+03 1.00710068E+01-6.47706173E-03 1.85819424E-06-2.02999015E-10 2

-1.23103049E+08-3.25505139E+04-6.97939303E+02 2.39373581E+01 7.55036250E-03 3

-4.98446405E-05 3.16775519E-08-1.21403605E+08 1.92683799E+03 4

(B2O3)794 021221B 1588O 2382 G 100.0 3000.0 800.0 1

5.96649095E+03 1.00840271E+01-6.48546945E-03 1.86061472E-06-2.03264218E-10 2

-1.23258851E+08-3.25908363E+04-6.98853612E+02 2.39685714E+01 7.55491511E-03 3

-4.98995151E-05 3.17133604E-08-1.21557306E+08 1.92931210E+03 4

(B2O3)795 021221B 1590O 2385 G 100.0 3000.0 800.0 1

5.97420906E+03 1.00962223E+01-6.49330492E-03 1.86286382E-06-2.03510160E-10 2

-1.23414730E+08-3.26329005E+04-6.99676389E+02 2.39985609E+01 7.56513295E-03 3

-4.99636587E-05 3.17539944E-08-1.21711008E+08 1.93147282E+03 4

(B2O3)796 021221B 1592O 2388 G 100.0 3000.0 800.0 1

5.98162095E+03 1.01092491E+01-6.50171880E-03 1.86527742E-06-2.03773013E-10 2

-1.23570530E+08-3.26734435E+04-7.00607023E+02 2.40296049E+01 7.57203721E-03 3

-5.00233826E-05 3.17926465E-08-1.21864701E+08 1.93400070E+03 4

(B2O3)797 021221B 1594O 2391 G 100.0 3000.0 800.0 1

5.98922287E+03 1.01215651E+01-6.50951805E-03 1.86748868E-06-2.04013163E-10 2

-1.23726388E+08-3.27148945E+04-7.01418036E+02 2.40593908E+01 7.58171593E-03 3

-5.00854693E-05 3.18318881E-08-1.22018405E+08 1.93614865E+03 4

(B2O3)798 021221B 1596O 2394 G 100.0 3000.0 800.0 1

5.99685487E+03 1.01339457E+01-6.51739213E-03 1.86973011E-06-2.04256993E-10 2

-1.23882244E+08-3.27565705E+04-7.02234727E+02 2.40885691E+01 7.59618308E-03 3

-5.01567026E-05 3.18763980E-08-1.22172100E+08 1.93831832E+03 4

(B2O3)799 021221B 1598O 2397 G 100.0 3000.0 800.0 1

6.00425418E+03 1.01468804E+01-6.52572221E-03 1.87211991E-06-2.04517923E-10 2

-1.24038055E+08-3.27969876E+04-7.03111098E+02 2.41194572E+01 7.60154777E-03 3

-5.02124115E-05 3.19125014E-08-1.22325806E+08 1.94066775E+03 4

(B2O3)800 021221B 1600O 2400 G 100.0 3000.0 800.0 1

6.01178856E+03 1.01596366E+01-6.53405664E-03 1.87454651E-06-2.04785753E-10 2

-1.24193904E+08-3.28382198E+04-7.04079619E+02 2.41503518E+01 7.60978768E-03 3

-5.02746531E-05 3.19525040E-08-1.22479503E+08 1.94337269E+03 4

(B2O3)801 021221B 1602O 2403 G 100.0 3000.0 800.0 1

6.01923161E+03 1.01724170E+01-6.54222438E-03 1.87686863E-06-2.05037379E-10 2

-1.24349701E+08-3.28788031E+04-7.04914482E+02 2.41811376E+01 7.61537537E-03 3

-5.03307723E-05 3.19888541E-08-1.22633202E+08 1.94554398E+03 4

(B2O3)802 021221B 1604O 2406 G 100.0 3000.0 800.0 1

6.02683185E+03 1.01849195E+01-6.55022364E-03 1.87915853E-06-2.05287685E-10 2

-1.24505556E+08-3.29202988E+04-7.05761298E+02 2.42112499E+01 7.62504240E-03 3

-5.03937537E-05 3.20288180E-08-1.22786901E+08 1.94779419E+03 4

(B2O3)803 021221B 1606O 2409 G 100.0 3000.0 800.0 1

6.03429226E+03 1.01976804E+01-6.55842002E-03 1.88149870E-06-2.05541928E-10 2

-1.24661369E+08-3.29610505E+04-7.06662885E+02 2.42419857E+01 7.63246837E-03 3

-5.04538501E-05 3.20675071E-08-1.22940601E+08 1.95022811E+03 4

(B2O3)804 021221B 1608O 2412 G 100.0 3000.0 800.0 1

6.04192815E+03 1.02101265E+01-6.56647717E-03 1.88383025E-06-2.05798385E-10 2

-1.24817252E+08-3.30027941E+04-7.07436310E+02 2.42706457E+01 7.64786603E-03 3

-5.05254308E-05 3.21118558E-08-1.23094302E+08 1.95226770E+03 4

(B2O3)805 021221B 1610O 2415 G 100.0 3000.0 800.0 1

6.04946610E+03 1.02226351E+01-6.57444771E-03 1.88610705E-06-2.06047142E-10 2

-1.24973108E+08-3.30439825E+04-7.08425911E+02 2.43021601E+01 7.65194390E-03 3

-5.05801973E-05 3.21477839E-08-1.23248005E+08 1.95505337E+03 4

(B2O3)806 021221B 1612O 2418 G 100.0 3000.0 800.0 1

6.05702643E+03 1.02353078E+01-6.58261489E-03 1.88844496E-06-2.06301456E-10 2

-1.25128945E+08-3.30852409E+04-7.09351144E+02 2.43333282E+01 7.65884473E-03 3

-5.06404612E-05 3.21868310E-08-1.23401708E+08 1.95755917E+03 4

(B2O3)807 021221B 1614O 2421 G 100.0 3000.0 800.0 1

6.06469041E+03 1.02475998E+01-6.59046164E-03 1.89067973E-06-2.06544497E-10 2

-1.25284823E+08-3.31270673E+04-7.10141948E+02 2.43625257E+01 7.67200438E-03 3

-5.07086705E-05 3.22294436E-08-1.23555412E+08 1.95963726E+03 4

(B2O3)808 021221B 1616O 2424 G 100.0 3000.0 800.0 1

6.07199720E+03 1.02608257E+01-6.59905906E-03 1.89316390E-06-2.06816727E-10 2

-1.25440614E+08-3.31670501E+04-7.11023359E+02 2.43932811E+01 7.67809324E-03 3

-5.07654282E-05 3.22660297E-08-1.23709117E+08 1.96200251E+03 4

(B2O3)809 021221B 1618O 2427 G 100.0 3000.0 800.0 1

6.07971685E+03 1.02729955E+01-6.60686587E-03 1.89540464E-06-2.07062047E-10 2

-1.25596510E+08-3.32091623E+04-7.11927029E+02 2.44236313E+01 7.68805234E-03 3

-5.08303045E-05 3.23074660E-08-1.23862824E+08 1.96449094E+03 4

(B2O3)810 021221B 1620O 2430 G 100.0 3000.0 800.0 1

6.08719884E+03 1.02856543E+01-6.61492916E-03 1.89770211E-06-2.07311910E-10 2

-1.25752320E+08-3.32499877E+04-7.12845734E+02 2.44546332E+01 7.69456836E-03 3

-5.08892246E-05 3.23456412E-08-1.24016521E+08 1.96699416E+03 4

(B2O3)811 021221B 1622O 2433 G 100.0 3000.0 800.0 1

6.09473167E+03 1.02983493E+01-6.62311102E-03 1.90004711E-06-2.07567712E-10 2

-1.25908176E+08-3.32911651E+04-7.13682950E+02 2.44847087E+01 7.70367538E-03 3

-5.09507379E-05 3.23846826E-08-1.24170229E+08 1.96920482E+03 4

(B2O3)812 021221B 1624O 2436 G 100.0 3000.0 800.0 1

6.10212343E+03 1.03114015E+01-6.63158973E-03 1.90249523E-06-2.07835941E-10 2

-1.26063978E+08-3.33315988E+04-7.14507915E+02 2.45143759E+01 7.71503693E-03 3

-5.10161047E-05 3.24257918E-08-1.24323929E+08 1.97139251E+03 4

(B2O3)813 021221B 1626O 2439 G 100.0 3000.0 800.0 1

6.10966540E+03 1.03240510E+01-6.63973399E-03 1.90483768E-06-2.08092705E-10 2

-1.26219828E+08-3.33727605E+04-7.15437868E+02 2.45458418E+01 7.71939262E-03 3

-5.10715761E-05 3.24622037E-08-1.24477639E+08 1.97392131E+03 4

(B2O3)814 021221B 1628O 2442 G 100.0 3000.0 800.0 1

6.11724689E+03 1.03366166E+01-6.64779023E-03 1.90714046E-06-2.08343508E-10 2

-1.26375680E+08-3.34141591E+04-7.16329083E+02 2.45763861E+01 7.72784260E-03 3

-5.11330654E-05 3.25014728E-08-1.24631340E+08 1.97633482E+03 4

(B2O3)815 021221B 1630O 2445 G 100.0 3000.0 800.0 1

6.12474782E+03 1.03492823E+01-6.65596373E-03 1.90949111E-06-2.08600590E-10 2

-1.26531506E+08-3.34551065E+04-7.17206906E+02 2.46070096E+01 7.73529234E-03 3

-5.11930223E-05 3.25400710E-08-1.24785042E+08 1.97868549E+03 4

(B2O3)816 021221B 1632O 2448 G 100.0 3000.0 800.0 1

6.13203984E+03 1.03626271E+01-6.66469397E-03 1.91202233E-06-2.08878590E-10 2

-1.26687297E+08-3.34949858E+04-7.18092855E+02 2.46379155E+01 7.74141175E-03 3

-5.12505174E-05 3.25772899E-08-1.24938756E+08 1.98107681E+03 4

(B2O3)817 021221B 1634O 2451 G 100.0 3000.0 800.0 1

6.13984640E+03 1.03746568E+01-6.67234909E-03 1.91420918E-06-2.09117616E-10 2

-1.26843232E+08-3.35376636E+04-7.18824533E+02 2.46660844E+01 7.75823656E-03 3

-5.13233195E-05 3.26218607E-08-1.25092460E+08 1.98293839E+03 4

(B2O3)818 021221B 1636O 2454 G 100.0 3000.0 800.0 1

6.14736083E+03 1.03873378E+01-6.68048538E-03 1.91653674E-06-2.09371387E-10 2

-1.26999066E+08-3.35786696E+04-7.19740649E+02 2.46971242E+01 7.76461349E-03 3

-5.13819646E-05 3.26598713E-08-1.25246165E+08 1.98544386E+03 4

(B2O3)819 021221B 1638O 2457 G 100.0 3000.0 800.0 1

6.15490057E+03 1.04000352E+01-6.68871057E-03 1.91890729E-06-2.09631040E-10 2

-1.27154911E+08-3.36198424E+04-7.20611433E+02 2.47275597E+01 7.77343677E-03 3

-5.14443249E-05 3.26997755E-08-1.25399871E+08 1.98778068E+03 4

(B2O3)820 021221B 1640O 2460 G 100.0 3000.0 800.0 1

6.16237245E+03 1.04127015E+01-6.69681363E-03 1.92122352E-06-2.09883342E-10 2

-1.27310735E+08-3.36606520E+04-7.21518558E+02 2.47581719E+01 7.78147339E-03 3

-5.15055864E-05 3.27391833E-08-1.25553578E+08 1.99024953E+03 4

(B2O3)821 021221B 1642O 2463 G 100.0 3000.0 800.0 1

6.16984725E+03 1.04252933E+01-6.70480686E-03 1.92349102E-06-2.10129066E-10 2

-1.27466557E+08-3.37014281E+04-7.22402892E+02 2.47889303E+01 7.78773293E-03 3

-5.15631295E-05 3.27763574E-08-1.25707287E+08 1.99263277E+03 4

(B2O3)822 021221B 1644O 2466 G 100.0 3000.0 800.0 1

6.17741169E+03 1.04383704E+01-6.71351899E-03 1.92604163E-06-2.10409827E-10 2

-1.27622428E+08-3.37428593E+04-7.23191006E+02 2.48183193E+01 7.80113989E-03 3

-5.16317977E-05 3.28190717E-08-1.25860996E+08 1.99465939E+03 4

(B2O3)823 021221B 1646O 2469 G 100.0 3000.0 800.0 1

6.18506874E+03 1.04504744E+01-6.72116064E-03 1.92822377E-06-2.10649808E-10 2

-1.27778307E+08-3.37845530E+04-7.24125216E+02 2.48496986E+01 7.80508148E-03 3

-5.16863296E-05 3.28549532E-08-1.26014706E+08 1.99724845E+03 4

(B2O3)824 021221B 1648O 2472 G 100.0 3000.0 800.0 1

6.19268398E+03 1.04629121E+01-6.72915400E-03 1.93052438E-06-2.10902092E-10 2

-1.27934171E+08-3.38261661E+04-7.25013906E+02 2.48798458E+01 7.81559344E-03 3

-5.17516035E-05 3.28964270E-08-1.26168407E+08 1.99965147E+03 4

(B2O3)825 021221B 1650O 2475 G 100.0 3000.0 800.0 1

6.20011377E+03 1.04758078E+01-6.73742975E-03 1.93288276E-06-2.11157787E-10 2

-1.28089992E+08-3.38667496E+04-7.25856081E+02 2.49103068E+01 7.82284457E-03 3

-5.18101520E-05 3.29339323E-08-1.26322119E+08 2.00187004E+03 4

(B2O3)826 021221B 1652O 2478 G 100.0 3000.0 800.0 1

6.20758122E+03 1.04885940E+01-6.74574494E-03 1.93528990E-06-2.11422090E-10 2

-1.28245815E+08-3.39075027E+04-7.26705139E+02 2.49407051E+01 7.83109507E-03 3

-5.18712401E-05 3.29730586E-08-1.26475832E+08 2.00412183E+03 4

(B2O3)827 021221B 1654O 2481 G 100.0 3000.0 800.0 1

6.21533087E+03 1.05007469E+01-6.75344656E-03 1.93747076E-06-2.11658473E-10 2

-1.28401723E+08-3.39498171E+04-7.27577184E+02 2.49706465E+01 7.84235912E-03 3

-5.19372132E-05 3.30146866E-08-1.26629536E+08 2.00648497E+03 4

(B2O3)828 021221B 1656O 2484 G 100.0 3000.0 800.0 1

6.22275520E+03 1.05137729E+01-6.76192372E-03 1.93992949E-06-2.11929422E-10 2

-1.28557557E+08-3.39904077E+04-7.28426674E+02 2.50009863E+01 7.85053292E-03 3

-5.19975069E-05 3.30532227E-08-1.26783251E+08 2.00875821E+03 4

(B2O3)829 021221B 1658O 2487 G 100.0 3000.0 800.0 1

6.23020812E+03 1.05264032E+01-6.76997194E-03 1.94222346E-06-2.12178992E-10 2

-1.28713363E+08-3.40310579E+04-7.29316834E+02 2.50317588E+01 7.85728436E-03 3

-5.20564507E-05 3.30913308E-08-1.26936956E+08 2.01115199E+03 4

(B2O3)830 021221B 1660O 2490 G 100.0 3000.0 800.0 1

6.23767164E+03 1.05393120E+01-6.77830691E-03 1.94461001E-06-2.12438503E-10 2

-1.28869201E+08-3.40719068E+04-7.30175916E+02 2.50616648E+01 7.86811885E-03 3

-5.21212980E-05 3.31322824E-08-1.27090663E+08 2.01345899E+03 4

(B2O3)831 021221B 1662O 2493 G 100.0 3000.0 800.0 1

6.24528839E+03 1.05517313E+01-6.78630698E-03 1.94691933E-06-2.12692722E-10 2

-1.29025071E+08-3.41134264E+04-7.31046683E+02 2.50925906E+01 7.87400782E-03 3

-5.21786517E-05 3.31694813E-08-1.27244381E+08 2.01577274E+03 4

(B2O3)832 021221B 1664O 2496 G 100.0 3000.0 800.0 1

6.25288071E+03 1.05643410E+01-6.79447679E-03 1.94928080E-06-2.12952286E-10 2

-1.29180942E+08-3.41549068E+04-7.31945299E+02 2.51233357E+01 7.88145540E-03 3

-5.22385864E-05 3.32079991E-08-1.27398090E+08 2.01820628E+03 4

(B2O3)833 021221B 1666O 2499 G 100.0 3000.0 800.0 1

6.26059986E+03 1.05766527E+01-6.80240035E-03 1.95155624E-06-2.13201272E-10 2

-1.29336838E+08-3.41970202E+04-7.32864496E+02 2.51541118E+01 7.89017421E-03 3

-5.23017015E-05 3.32485110E-08-1.27551799E+08 2.02072585E+03 4

(B2O3)834 021221B 1668O 2502 G 100.0 3000.0 800.0 1

6.26780065E+03 1.05898543E+01-6.81086948E-03 1.95397299E-06-2.13463588E-10 2

-1.29492602E+08-3.42364216E+04-7.33705697E+02 2.51839691E+01 7.89911275E-03 3

-5.23624112E-05 3.32870604E-08-1.27705510E+08 2.02298625E+03 4

(B2O3)835 021221B 1670O 2505 G 100.0 3000.0 800.0 1

6.27547757E+03 1.06021873E+01-6.81875865E-03 1.95622462E-06-2.13708713E-10 2

-1.29648493E+08-3.42783484E+04-7.34615818E+02 2.52144456E+01 7.90875192E-03 3

-5.24267777E-05 3.33282277E-08-1.27859221E+08 2.02546542E+03 4

(B2O3)836 021221B 1672O 2508 G 100.0 3000.0 800.0 1

6.28313688E+03 1.06144603E+01-6.82658753E-03 1.95846346E-06-2.13953174E-10 2

-1.29804364E+08-3.43200887E+04-7.35534415E+02 2.52455683E+01 7.91499162E-03 3

-5.24854922E-05 3.33663192E-08-1.28012934E+08 2.02796065E+03 4

(B2O3)837 021221B 1674O 2511 G 100.0 3000.0 800.0 1

6.29064608E+03 1.06272906E+01-6.83490524E-03 1.96085611E-06-2.14214665E-10 2

-1.29960235E+08-3.43612115E+04-7.36256866E+02 2.52736755E+01 7.93171318E-03 3

-5.25578552E-05 3.34106374E-08-1.28166647E+08 2.02982237E+03 4

(B2O3)838 021221B 1676O 2514 G 100.0 3000.0 800.0 1

6.29803197E+03 1.06401387E+01-6.84315383E-03 1.96321776E-06-2.14472157E-10 2

-1.30116037E+08-3.44015258E+04-7.37082479E+02 2.53039307E+01 7.93931765E-03 3

-5.26168676E-05 3.34483765E-08-1.28320362E+08 2.03198385E+03 4

(B2O3)839 021221B 1678O 2517 G 100.0 3000.0 800.0 1

6.30589573E+03 1.06522414E+01-6.85099807E-03 1.96548731E-06-2.14722059E-10 2

-1.30271984E+08-3.44444251E+04-7.38011958E+02 2.53348032E+01 7.94822267E-03 3

-5.26805570E-05 3.34892127E-08-1.28474077E+08 2.03453811E+03 4

(B2O3)840 021221B 1680O 2520 G 100.0 3000.0 800.0 1

6.31304944E+03 1.06656777E+01-6.85963197E-03 1.96795802E-06-2.14991004E-10 2

-1.30427727E+08-3.44835874E+04-7.38898854E+02 2.53655335E+01 7.95427841E-03 3

-5.27374206E-05 3.35260122E-08-1.28627783E+08 2.03691877E+03 4

(B2O3)841 021221B 1682O 2523 G 100.0 3000.0 800.0 1

6.32087669E+03 1.06776247E+01-6.86725671E-03 1.97013265E-06-2.15227849E-10 2

-1.30583657E+08-3.45262531E+04-7.39886478E+02 2.53969428E+01 7.96104114E-03 3

-5.27982147E-05 3.35655142E-08-1.28781500E+08 2.03968066E+03 4

(B2O3)842 021221B 1684O 2526 G 100.0 3000.0 800.0 1

6.32822022E+03 1.06906814E+01-6.87568580E-03 1.97255302E-06-2.15492088E-10 2

-1.30739461E+08-3.45664308E+04-7.40747845E+02 2.54272273E+01 7.96885870E-03 3

-5.28574415E-05 3.36033068E-08-1.28935208E+08 2.04199247E+03 4

(B2O3)843 021221B 1686O 2529 G 100.0 3000.0 800.0 1

6.33572336E+03 1.07033693E+01-6.88387437E-03 1.97491408E-06-2.15751321E-10 2

-1.30895319E+08-3.46074632E+04-7.41691370E+02 2.54583233E+01 7.97472615E-03 3

-5.29149875E-05 3.36406374E-08-1.29088927E+08 2.04457322E+03 4

(B2O3)844 021221B 1688O 2532 G 100.0 3000.0 800.0 1

6.34341728E+03 1.07157374E+01-6.89181943E-03 1.97719519E-06-2.16000871E-10 2

-1.31051227E+08-3.46494735E+04-7.42641580E+02 2.54892299E+01 7.98298425E-03 3

-5.29772088E-05 3.36805941E-08-1.29242647E+08 2.04722105E+03 4

(B2O3)845 021221B 1690O 2535 G 100.0 3000.0 800.0 1

6.35092624E+03 1.07283220E+01-6.89982888E-03 1.97946477E-06-2.16246142E-10 2

-1.31207057E+08-3.46904246E+04-7.43592903E+02 2.55206556E+01 7.98808995E-03 3

-5.30343717E-05 3.37180031E-08-1.29396358E+08 2.04984140E+03 4

(B2O3)846 021221B 1692O 2538 G 100.0 3000.0 800.0 1

6.35830093E+03 1.07413281E+01-6.90828499E-03 1.98191273E-06-2.16515234E-10 2

-1.31362878E+08-3.47308040E+04-7.44418444E+02 2.55502675E+01 7.99884699E-03 3

-5.30983884E-05 3.37583812E-08-1.29550069E+08 2.05202554E+03 4

(B2O3)847 021221B 1694O 2541 G 100.0 3000.0 800.0 1

6.36598455E+03 1.07535929E+01-6.91607487E-03 1.98412542E-06-2.16755427E-10 2

-1.31518769E+08-3.47727154E+04-7.45191311E+02 2.55794716E+01 8.01151979E-03 3

-5.31652970E-05 3.38001310E-08-1.29703782E+08 2.05403992E+03 4

(B2O3)848 021221B 1696O 2544 G 100.0 3000.0 800.0 1

6.37357766E+03 1.07660069E+01-6.92403334E-03 1.98641398E-06-2.17006669E-10 2

-1.31674627E+08-3.48140844E+04-7.46141686E+02 2.56113428E+01 8.01464862E-03 3

-5.32195972E-05 3.38361475E-08-1.29857506E+08 2.05661106E+03 4

(B2O3)849 021221B 1698O 2547 G 100.0 3000.0 800.0 1

6.38116888E+03 1.07787002E+01-6.93223088E-03 1.98876882E-06-2.17263965E-10 2

-1.31830499E+08-3.48555792E+04-7.47006726E+02 2.56416248E+01 8.02443724E-03 3

-5.32831820E-05 3.38765034E-08-1.30011220E+08 2.05891143E+03 4

(B2O3)850 021221B 1700O 2550 G 100.0 3000.0 800.0 1

6.38868398E+03 1.07913841E+01-6.94043673E-03 1.99112555E-06-2.17520864E-10 2

-1.31986367E+08-3.48966963E+04-7.47825171E+02 2.56708741E+01 8.03697471E-03 3

-5.33499737E-05 3.39182619E-08-1.30164935E+08 2.06110955E+03 4

(B2O3)851 021221B 1702O 2553 G 100.0 3000.0 800.0 1

6.39615643E+03 1.08040065E+01-6.94846008E-03 1.99340962E-06-2.17769572E-10 2

-1.32142201E+08-3.49375162E+04-7.48754039E+02 2.57016321E+01 8.04457495E-03 3

-5.34106707E-05 3.39574177E-08-1.30318652E+08 2.06365496E+03 4

(B2O3)852 021221B 1704O 2556 G 100.0 3000.0 800.0 1

6.40347024E+03 1.08172410E+01-6.95707690E-03 1.99590126E-06-2.18042575E-10 2

-1.32298002E+08-3.49775247E+04-7.49696899E+02 2.57331361E+01 8.04842279E-03 3

-5.34647325E-05 3.39928357E-08-1.30472369E+08 2.06623182E+03 4

(B2O3)853 021221B 1706O 2559 G 100.0 3000.0 800.0 1

6.41114366E+03 1.08294418E+01-6.96480841E-03 1.99809538E-06-2.18280734E-10 2

-1.32453877E+08-3.50193310E+04-7.50588034E+02 2.57638419E+01 8.05665720E-03 3

-5.35269302E-05 3.40329075E-08-1.30626087E+08 2.06862489E+03 4

(B2O3)854 021221B 1708O 2562 G 100.0 3000.0 800.0 1

6.41861419E+03 1.08423740E+01-6.97320866E-03 2.00052147E-06-2.18546843E-10 2

-1.32609722E+08-3.50601522E+04-7.51462493E+02 2.57946704E+01 8.06310759E-03 3

-5.35847875E-05 3.40702115E-08-1.30779806E+08 2.07095884E+03 4

(B2O3)855 021221B 1710O 2565 G 100.0 3000.0 800.0 1

6.42631327E+03 1.08547181E+01-6.98121352E-03 2.00283943E-06-2.18802233E-10 2

-1.32765635E+08-3.51021962E+04-7.52281183E+02 2.58243607E+01 8.07421462E-03 3

-5.36496848E-05 3.41110288E-08-1.30933526E+08 2.07312549E+03 4

(B2O3)856 021221B 1712O 2568 G 100.0 3000.0 800.0 1

6.43378119E+03 1.08673333E+01-6.98923934E-03 2.00511978E-06-2.19049547E-10 2

-1.32921452E+08-3.51429665E+04-7.53132775E+02 2.58542617E+01 8.08504239E-03 3

-5.37151984E-05 3.41526151E-08-1.31087236E+08 2.07539241E+03 4

(B2O3)857 021221B 1714O 2571 G 100.0 3000.0 800.0 1

6.44119911E+03 1.08802332E+01-6.99754442E-03 2.00750531E-06-2.19310322E-10 2

-1.33077287E+08-3.51834968E+04-7.54033531E+02 2.58853130E+01 8.09005929E-03 3

-5.37706189E-05 3.41886537E-08-1.31240958E+08 2.07783369E+03 4

(B2O3)858 021221B 1716O 2574 G 100.0 3000.0 800.0 1

6.44883785E+03 1.08926351E+01-7.00549728E-03 2.00977912E-06-2.19557810E-10 2

-1.33233169E+08-3.52251680E+04-7.54996620E+02 2.59162503E+01 8.09892387E-03 3

-5.38348025E-05 3.42299994E-08-1.31394681E+08 2.08053552E+03 4

(B2O3)859 021221B 1718O 2577 G 100.0 3000.0 800.0 1

6.45637012E+03 1.09053037E+01-7.01365270E-03 2.01211714E-06-2.19813183E-10 2

-1.33389039E+08-3.52663877E+04-7.55744116E+02 2.59450407E+01 8.11197426E-03 3

-5.39008743E-05 3.42708484E-08-1.31548394E+08 2.08244561E+03 4

(B2O3)860 021221B 1720O 2580 G 100.0 3000.0 800.0 1

6.46396991E+03 1.09179226E+01-7.02182169E-03 2.01446972E-06-2.20070889E-10 2

-1.33544921E+08-3.53078811E+04-7.56642835E+02 2.59758807E+01 8.11941747E-03 3

-5.39611583E-05 3.43096528E-08-1.31702118E+08 2.08487873E+03 4

(B2O3)861 021221B 1722O 2583 G 100.0 3000.0 800.0 1

6.47148776E+03 1.09303685E+01-7.02972761E-03 2.01672177E-06-2.20316008E-10 2

-1.33700754E+08-3.53488547E+04-7.57556540E+02 2.60069908E+01 8.12491917E-03 3

-5.40184828E-05 3.43470601E-08-1.31855833E+08 2.08735703E+03 4

(B2O3)862 021221B 1724O 2586 G 100.0 3000.0 800.0 1

6.47908152E+03 1.09429651E+01-7.03791216E-03 2.01909713E-06-2.20578199E-10 2

-1.33856626E+08-3.53902813E+04-7.58460306E+02 2.60380893E+01 8.13151930E-03 3

-5.40780714E-05 3.43857612E-08-1.32009560E+08 2.08978589E+03 4

(B2O3)863 021221B 1726O 2589 G 100.0 3000.0 800.0 1

6.48657111E+03 1.09556717E+01-7.04603674E-03 2.02140832E-06-2.20828511E-10 2

-1.34012470E+08-3.54311985E+04-7.59350698E+02 2.60686781E+01 8.13918393E-03 3

-5.41380244E-05 3.44242034E-08-1.32163276E+08 2.09219159E+03 4

(B2O3)864 021221B 1728O 2592 G 100.0 3000.0 800.0 1

6.49394878E+03 1.09687789E+01-7.05452702E-03 2.02384799E-06-2.21094633E-10 2

-1.34168289E+08-3.54715527E+04-7.60195413E+02 2.60987889E+01 8.14847482E-03 3

-5.41999432E-05 3.44634662E-08-1.32316994E+08 2.09444410E+03 4

(B2O3)865 021221B 1730O 2595 G 100.0 3000.0 800.0 1

6.50159834E+03 1.09811773E+01-7.06255227E-03 2.02616352E-06-2.21348834E-10 2

-1.34324184E+08-3.55132592E+04-7.61129105E+02 2.61303184E+01 8.15280610E-03 3

-5.42556635E-05 3.45000394E-08-1.32470723E+08 2.09698795E+03 4

(B2O3)866 021221B 1732O 2598 G 100.0 3000.0 800.0 1

6.50920830E+03 1.09935836E+01-7.07044167E-03 2.02841395E-06-2.21594275E-10 2

-1.34480082E+08-3.55548940E+04-7.61806576E+02 2.61573981E+01 8.17393547E-03 3

-5.43350991E-05 3.45481336E-08-1.32624443E+08 2.09871777E+03 4

(B2O3)867 021221B 1734O 2601 G 100.0 3000.0 800.0 1

6.51669380E+03 1.10061964E+01-7.07846841E-03 2.03069463E-06-2.21841852E-10 2

-1.34635912E+08-3.55957265E+04-7.62742411E+02 2.61888788E+01 8.17833078E-03 3

-5.43909576E-05 3.45848592E-08-1.32778163E+08 2.10124570E+03 4

(B2O3)868 021221B 1736O 2604 G 100.0 3000.0 800.0 1

6.52412669E+03 1.10190617E+01-7.08679179E-03 2.03309350E-06-2.22104469E-10 2

-1.34791745E+08-3.56363205E+04-7.63608422E+02 2.62193299E+01 8.18609240E-03 3

-5.44508277E-05 3.46232138E-08-1.32931884E+08 2.10358352E+03 4

(B2O3)869 021221B 1738O 2607 G 100.0 3000.0 800.0 1

6.53174696E+03 1.10316418E+01-7.09495953E-03 2.03544788E-06-2.22362053E-10 2

-1.34947635E+08-3.56779604E+04-7.64481130E+02 2.62497030E+01 8.19505700E-03 3

-5.45128356E-05 3.46626225E-08-1.33085606E+08 2.10592181E+03 4

(B2O3)870 021221B 1740O 2610 G 100.0 3000.0 800.0 1

6.53934386E+03 1.10441912E+01-7.10304431E-03 2.03777763E-06-2.22618061E-10 2

-1.35103511E+08-3.57194204E+04-7.65391376E+02 2.62806661E+01 8.20213465E-03 3

-5.45729706E-05 3.47015613E-08-1.33239330E+08 2.10839294E+03 4

(B2O3)871 021221B 1742O 2613 G 100.0 3000.0 800.0 1

6.54683278E+03 1.10569122E+01-7.11118765E-03 2.04009642E-06-2.22869726E-10 2

-1.35259353E+08-3.57602780E+04-7.66306781E+02 2.63117800E+01 8.20812805E-03 3

-5.46309804E-05 3.47392265E-08-1.33393054E+08 2.11089035E+03 4

(B2O3)872 021221B 1744O 2616 G 100.0 3000.0 800.0 1

6.55424449E+03 1.10697703E+01-7.11949773E-03 2.04249421E-06-2.23132767E-10 2

-1.35415185E+08-3.58008601E+04-7.67102309E+02 2.63409937E+01 8.22002973E-03 3

-5.46962166E-05 3.47800176E-08-1.33546768E+08 2.11295707E+03 4

(B2O3)873 021221B 1746O 2619 G 100.0 3000.0 800.0 1

6.56177251E+03 1.10822372E+01-7.12742317E-03 2.04474925E-06-2.23377701E-10 2

-1.35571030E+08-3.58418617E+04-7.67984746E+02 2.63719264E+01 8.22579775E-03 3

-5.47533969E-05 3.48171384E-08-1.33700493E+08 2.11533900E+03 4

(B2O3)874 021221B 1748O 2622 G 100.0 3000.0 800.0 1

6.56962043E+03 1.10944050E+01-7.13528097E-03 2.04701548E-06-2.23626849E-10 2

-1.35726985E+08-3.58846892E+04-7.68842681E+02 2.64019633E+01 8.23766072E-03 3

-5.48210949E-05 3.48598845E-08-1.33854220E+08 2.11763862E+03 4

(B2O3)875 021221B 1750O 2625 G 100.0 3000.0 800.0 1

6.57695013E+03 1.11073338E+01-7.14352701E-03 2.04936617E-06-2.23882519E-10 2

-1.35882777E+08-3.59247311E+04-7.69784809E+02 2.64335061E+01 8.24067003E-03 3

-5.48736425E-05 3.48945047E-08-1.34007937E+08 2.12019583E+03 4

(B2O3)876 021221B 1752O 2628 G 100.0 3000.0 800.0 1

6.58452785E+03 1.11199110E+01-7.15164170E-03 2.05169524E-06-2.24136584E-10 2

-1.36038654E+08-3.59661021E+04-7.70634766E+02 2.64635799E+01 8.25096563E-03 3

-5.49382496E-05 3.49355571E-08-1.34161665E+08 2.12246598E+03 4

(B2O3)877 021221B 1754O 2631 G 100.0 3000.0 800.0 1

6.59190490E+03 1.11331377E+01-7.16027261E-03 2.05419189E-06-2.24410410E-10 2

-1.36194493E+08-3.60064788E+04-7.71427715E+02 2.64931662E+01 8.26203089E-03 3

-5.50024284E-05 3.49758463E-08-1.34315395E+08 2.12453768E+03 4

(B2O3)878 021221B 1756O 2634 G 100.0 3000.0 800.0 1

6.59954105E+03 1.11454024E+01-7.16814879E-03 2.05646293E-06-2.24660186E-10 2

-1.36350373E+08-3.60481191E+04-7.72364353E+02 2.65243189E+01 8.26778754E-03 3

-5.50603028E-05 3.50135160E-08-1.34469114E+08 2.12711211E+03 4

(B2O3)879 021221B 1758O 2637 G 100.0 3000.0 800.0 1

6.60709219E+03 1.11580698E+01-7.17632491E-03 2.05881174E-06-2.24916848E-10 2

-1.36506248E+08-3.60893670E+04-7.73190679E+02 2.65542994E+01 8.27772342E-03 3

-5.51235130E-05 3.50535463E-08-1.34622845E+08 2.12928145E+03 4

(B2O3)880 021221B 1760O 2640 G 100.0 3000.0 800.0 1

6.61467221E+03 1.11706186E+01-7.18438803E-03 2.06112555E-06-2.25169969E-10 2

-1.36662119E+08-3.61307465E+04-7.74047711E+02 2.65846200E+01 8.28643856E-03 3

-5.51850546E-05 3.50927842E-08-1.34776567E+08 2.13156791E+03 4

(B2O3)881 021221B 1762O 2643 G 100.0 3000.0 800.0 1

6.62212669E+03 1.11834464E+01-7.19267461E-03 2.06350554E-06-2.25429612E-10 2

-1.36817977E+08-3.61715595E+04-7.74912281E+02 2.66144101E+01 8.29718010E-03 3

-5.52494322E-05 3.51334206E-08-1.34930289E+08 2.13391124E+03 4

(B2O3)882 021221B 1764O 2646 G 100.0 3000.0 800.0 1

6.62976002E+03 1.11959802E+01-7.20079286E-03 2.06584877E-06-2.25686951E-10 2

-1.36973877E+08-3.62132246E+04-7.75820011E+02 2.66449251E+01 8.30703938E-03 3

-5.53144654E-05 3.51750266E-08-1.35084023E+08 2.13641416E+03 4

(B2O3)883 021221B 1766O 2649 G 100.0 3000.0 800.0 1

6.63718366E+03 1.12086354E+01-7.20879621E-03 2.06811235E-06-2.25931707E-10 2

-1.37129699E+08-3.62537239E+04-7.76716215E+02 2.66759293E+01 8.31208004E-03 3

-5.53701366E-05 3.52112934E-08-1.35237747E+08 2.13882531E+03 4

(B2O3)884 021221B 1768O 2652 G 100.0 3000.0 800.0 1

6.64476044E+03 1.12212472E+01-7.21688110E-03 2.07042002E-06-2.26182433E-10 2

-1.37285578E+08-3.62951350E+04-7.77687257E+02 2.67069538E+01 8.32007901E-03 3

-5.54321473E-05 3.52512162E-08-1.35391471E+08 2.14153940E+03 4

(B2O3)885 021221B 1770O 2655 G 100.0 3000.0 800.0 1

6.65223635E+03 1.12340864E+01-7.22525512E-03 2.07285503E-06-2.26451305E-10 2

-1.37441440E+08-3.63360320E+04-7.78475917E+02 2.67363295E+01 8.33143370E-03 3

-5.54965556E-05 3.52915547E-08-1.35545197E+08 2.14359510E+03 4

(B2O3)886 021221B 1772O 2658 G 100.0 3000.0 800.0 1

6.65969060E+03 1.12469179E+01-7.23353128E-03 2.07523112E-06-2.26710653E-10 2

-1.37597290E+08-3.63767973E+04-7.79296462E+02 2.67659284E+01 8.34282780E-03 3

-5.55619954E-05 3.53327837E-08-1.35698924E+08 2.14576074E+03 4

(B2O3)887 021221B 1774O 2661 G 100.0 3000.0 800.0 1

6.66748763E+03 1.12589222E+01-7.24117076E-03 2.07741172E-06-2.26949064E-10 2

-1.37753225E+08-3.64192814E+04-7.80223662E+02 2.67970224E+01 8.34944396E-03 3

-5.56214685E-05 3.53713528E-08-1.35852651E+08 2.14830939E+03 4

(B2O3)888 021221B 1776O 2664 G 100.0 3000.0 800.0 1

6.67498201E+03 1.12716567E+01-7.24934850E-03 2.07975139E-06-2.27203966E-10 2

-1.37909071E+08-3.64601813E+04-7.81111177E+02 2.68278537E+01 8.35645716E-03 3

-5.56809073E-05 3.54097033E-08-1.36006379E+08 2.15069099E+03 4

(B2O3)889 021221B 1778O 2667 G 100.0 3000.0 800.0 1

6.68248499E+03 1.12843832E+01-7.25759980E-03 2.08213247E-06-2.27464707E-10 2

-1.38064932E+08-3.65011699E+04-7.81935255E+02 2.68576924E+01 8.36662569E-03 3

-5.57442376E-05 3.54497082E-08-1.36160108E+08 2.15287301E+03 4

(B2O3)890 021221B 1780O 2670 G 100.0 3000.0 800.0 1

6.68999349E+03 1.12970215E+01-7.26570109E-03 2.08444576E-06-2.27716413E-10 2

-1.38220776E+08-3.65421071E+04-7.82860424E+02 2.68890857E+01 8.37156235E-03 3

-5.58008735E-05 3.54867304E-08-1.36313839E+08 2.15537928E+03 4

(B2O3)891 021221B 1782O 2673 G 100.0 3000.0 800.0 1

6.69757719E+03 1.13096417E+01-7.27382427E-03 2.08678025E-06-2.27972068E-10 2

-1.38376658E+08-3.65835626E+04-7.83729089E+02 2.69192576E+01 8.38155696E-03 3

-5.58648865E-05 3.55274551E-08-1.36467558E+08 2.15771250E+03 4

(B2O3)892 021221B 1784O 2676 G 100.0 3000.0 800.0 1

6.70500149E+03 1.13224717E+01-7.28206711E-03 2.08914283E-06-2.28230189E-10 2

-1.38532506E+08-3.66241395E+04-7.84594865E+02 2.69498207E+01 8.38798498E-03 3

-5.59219542E-05 3.55641662E-08-1.36621290E+08 2.16002750E+03 4

(B2O3)893 021221B 1786O 2679 G 100.0 3000.0 800.0 1

6.71269474E+03 1.13347082E+01-7.28986478E-03 2.09136484E-06-2.28471886E-10 2

-1.38688399E+08-3.66660357E+04-7.85496423E+02 2.69806536E+01 8.39620220E-03 3

-5.59843633E-05 3.56043522E-08-1.36775023E+08 2.16247281E+03 4

(B2O3)894 021221B 1788O 2682 G 100.0 3000.0 800.0 1

6.71999929E+03 1.13479095E+01-7.29840594E-03 2.09381304E-06-2.28738076E-10 2

-1.38844206E+08-3.67060248E+04-7.86351611E+02 2.70107805E+01 8.40515362E-03 3

-5.60456650E-05 3.56433049E-08-1.36928745E+08 2.16475438E+03 4

(B2O3)895 021221B 1790O 2685 G 100.0 3000.0 800.0 1

6.72758648E+03 1.13603309E+01-7.30636912E-03 2.09609556E-06-2.28987577E-10 2

-1.39000083E+08-3.67473706E+04-7.87215916E+02 2.70413429E+01 8.41267524E-03 3

-5.61055892E-05 3.56818206E-08-1.37082480E+08 2.16708267E+03 4

(B2O3)896 021221B 1792O 2688 G 100.0 3000.0 800.0 1

6.73528461E+03 1.13725703E+01-7.31415599E-03 2.09831288E-06-2.29229084E-10 2

-1.39156005E+08-3.67894100E+04-7.88045456E+02 2.70707046E+01 8.42625943E-03 3

-5.61753906E-05 3.57255876E-08-1.37236215E+08 2.16929551E+03 4

(B2O3)897 021221B 1794O 2691 G 100.0 3000.0 800.0 1

6.74282607E+03 1.13852613E+01-7.32232562E-03 2.10066348E-06-2.29486499E-10 2

-1.39311875E+08-3.68306092E+04-7.88987316E+02 2.71019655E+01 8.43201738E-03 3

-5.62331951E-05 3.57632040E-08-1.37389940E+08 2.17187937E+03 4

(B2O3)898 021221B 1796O 2694 G 100.0 3000.0 800.0 1

6.75019973E+03 1.13982246E+01-7.33073170E-03 2.10307975E-06-2.29749900E-10 2

-1.39467703E+08-3.68709668E+04-7.89704187E+02 2.71304173E+01 8.44625705E-03 3

-5.63012987E-05 3.58052078E-08-1.37543666E+08 2.17367371E+03 4

(B2O3)899 021221B 1798O 2697 G 100.0 3000.0 800.0 1

6.75788034E+03 1.14104977E+01-7.33853850E-03 2.10529918E-06-2.29991081E-10 2

-1.39623602E+08-3.69128001E+04-7.90630149E+02 2.71615322E+01 8.45332888E-03 3

-5.63618934E-05 3.58444482E-08-1.37697404E+08 2.17621470E+03 4

(B2O3)900 021221B 1800O 2700 G 100.0 3000.0 800.0 1

6.76552464E+03 1.14229410E+01-7.34653572E-03 2.10759472E-06-2.30242046E-10 2

-1.39779493E+08-3.69545071E+04-7.91501295E+02 2.71919171E+01 8.46280424E-03 3

-5.64255626E-05 3.58850999E-08-1.37851132E+08 2.17855525E+03 4

(B2O3)901 021221B 1802O 2703 G 100.0 3000.0 800.0 1

6.77303428E+03 1.14357140E+01-7.35484069E-03 2.11000688E-06-2.30508567E-10 2

-1.39935372E+08-3.69955793E+04-7.92391342E+02 2.72227728E+01 8.46841571E-03 3

-5.64815356E-05 3.59212596E-08-1.38004861E+08 2.18094671E+03 4

(B2O3)902 021221B 1804O 2706 G 100.0 3000.0 800.0 1

6.78057372E+03 1.14484482E+01-7.36312085E-03 2.11240185E-06-2.30771516E-10 2

-1.40091243E+08-3.70367753E+04-7.93266019E+02 2.72531838E+01 8.47736500E-03 3

-5.65439254E-05 3.59610738E-08-1.38158590E+08 2.18329356E+03 4

(B2O3)903 021221B 1806O 2709 G 100.0 3000.0 800.0 1

6.78809474E+03 1.14610372E+01-7.37114845E-03 2.11468274E-06-2.31018706E-10 2

-1.40247104E+08-3.70777582E+04-7.94210896E+02 2.72849421E+01 8.48067554E-03 3

-5.65980924E-05 3.59968995E-08-1.38312332E+08 2.18587822E+03 4

(B2O3)904 021221B 1808O 2712 G 100.0 3000.0 800.0 1

6.79565112E+03 1.14736731E+01-7.37930746E-03 2.11703830E-06-2.31277718E-10 2

-1.40402978E+08-3.71190220E+04-7.95023869E+02 2.73146849E+01 8.49162930E-03 3

-5.66629275E-05 3.60377861E-08-1.38466063E+08 2.18801256E+03 4

(B2O3)905 021221B 1810O 2715 G 100.0 3000.0 800.0 1

6.80305451E+03 1.14865865E+01-7.38755860E-03 2.11937911E-06-2.31530370E-10 2

-1.40558803E+08-3.71594506E+04-7.95844109E+02 2.73443574E+01 8.50332345E-03 3

-5.67293888E-05 3.60797161E-08-1.38619795E+08 2.19018865E+03 4

(B2O3)906 021221B 1812O 2718 G 100.0 3000.0 800.0 1

6.81053899E+03 1.14993991E+01-7.39589775E-03 2.12180341E-06-2.31798221E-10 2

-1.40714682E+08-3.72004127E+04-7.96742199E+02 2.73750088E+01 8.51013938E-03 3

-5.67875556E-05 3.61171312E-08-1.38773528E+08 2.19262231E+03 4

(B2O3)907 021221B 1814O 2721 G 100.0 3000.0 800.0 1

6.81809470E+03 1.15118477E+01-7.40379648E-03 2.12404281E-06-2.32040740E-10 2

-1.40870568E+08-3.72417085E+04-7.97735217E+02 2.74060449E+01 8.51739757E-03 3

-5.68480634E-05 3.61562072E-08-1.38927261E+08 2.19543383E+03 4

(B2O3)908 021221B 1816O 2724 G 100.0 3000.0 800.0 1

6.82563016E+03 1.15245616E+01-7.41202688E-03 2.12641633E-06-2.32300886E-10 2

-1.41026439E+08-3.72828483E+04-7.98597269E+02 2.74363878E+01 8.52660448E-03 3

-5.69109580E-05 3.61963563E-08-1.39080996E+08 2.19774612E+03 4

(B2O3)909 021221B 1818O 2727 G 100.0 3000.0 800.0 1

6.83322716E+03 1.15371554E+01-7.42017764E-03 2.12876965E-06-2.32559633E-10 2

-1.41182331E+08-3.73243897E+04-7.99456433E+02 2.74665133E+01 8.53617618E-03 3

-5.69736444E-05 3.62361094E-08-1.39234720E+08 2.20003731E+03 4

(B2O3)910 021221B 1820O 2730 G 100.0 3000.0 800.0 1

6.84069041E+03 1.15498961E+01-7.42835837E-03 2.13110921E-06-2.32814294E-10 2

-1.41338170E+08-3.73650853E+04-8.00373473E+02 2.74978136E+01 8.54134054E-03 3

-5.70305434E-05 3.62732615E-08-1.39388456E+08 2.20252211E+03 4

(B2O3)911 021221B 1822O 2733 G 100.0 3000.0 800.0 1

6.84840807E+03 1.15620892E+01-7.43615971E-03 2.13334265E-06-2.33058376E-10 2

-1.41494100E+08-3.74072145E+04-8.01211897E+02 2.75277002E+01 8.55178375E-03 3

-5.70947016E-05 3.63138314E-08-1.39542193E+08 2.20474552E+03 4

(B2O3)912 021221B 1824O 2736 G 100.0 3000.0 800.0 1

6.85576317E+03 1.15750809E+01-7.44452477E-03 2.13574626E-06-2.33321214E-10 2

-1.41649931E+08-3.74474865E+04-8.02053340E+02 2.75573700E+01 8.56235467E-03 3

-5.71584158E-05 3.63540649E-08-1.39695920E+08 2.20699945E+03 4

(B2O3)913 021221B 1826O 2739 G 100.0 3000.0 800.0 1

6.86345435E+03 1.15874246E+01-7.45245763E-03 2.13801789E-06-2.33569060E-10 2

-1.41805844E+08-3.74894040E+04-8.02904504E+02 2.75876710E+01 8.57191888E-03 3

-5.72219985E-05 3.63945783E-08-1.39849659E+08 2.20928452E+03 4

(B2O3)914 021221B 1828O 2742 G 100.0 3000.0 800.0 1

6.87099652E+03 1.15999825E+01-7.46046220E-03 2.14029010E-06-2.33814980E-10 2

-1.41961706E+08-3.75305201E+04-8.03875627E+02 2.76193579E+01 8.57657620E-03 3

-5.72788877E-05 3.64319230E-08-1.40003399E+08 2.21196908E+03 4

(B2O3)915 021221B 1830O 2745 G 100.0 3000.0 800.0 1

6.87835593E+03 1.16130642E+01-7.46894200E-03 2.14273909E-06-2.34083877E-10 2

-1.42117541E+08-3.75708037E+04-8.04706556E+02 2.76495566E+01 8.58402812E-03 3

-5.73368628E-05 3.64688553E-08-1.40157128E+08 2.21414595E+03 4

(B2O3)916 021221B 1832O 2748 G 100.0 3000.0 800.0 1

6.88600271E+03 1.16253951E+01-7.47683209E-03 2.14499706E-06-2.34330356E-10 2

-1.42273443E+08-3.76125076E+04-8.05494128E+02 2.76789320E+01 8.59668840E-03 3

-5.74048456E-05 3.65116014E-08-1.40310869E+08 2.21619600E+03 4

(B2O3)917 021221B 1834O 2751 G 100.0 3000.0 800.0 1

6.89344634E+03 1.16383223E+01-7.48522094E-03 2.14741667E-06-2.34595269E-10 2

-1.42429289E+08-3.76531865E+04-8.06455011E+02 2.77102847E+01 8.60265495E-03 3

-5.74636353E-05 3.65499494E-08-1.40464600E+08 2.21885638E+03 4

(B2O3)918 021221B 1836O 2754 G 100.0 3000.0 800.0 1

6.90096254E+03 1.16509943E+01-7.49338350E-03 2.14976350E-06-2.34852211E-10 2

-1.42585167E+08-3.76942884E+04-8.07253809E+02 2.77397196E+01 8.61368647E-03 3

-5.75273830E-05 3.65898799E-08-1.40618332E+08 2.22094940E+03 4

(B2O3)919 021221B 1838O 2757 G 100.0 3000.0 800.0 1

6.90858281E+03 1.16634466E+01-7.50138807E-03 2.15205501E-06-2.35102020E-10 2

-1.42741060E+08-3.77358371E+04-8.08102109E+02 2.77699214E+01 8.62356488E-03 3

-5.75914062E-05 3.66305896E-08-1.40772076E+08 2.22321112E+03 4

(B2O3)920 021221B 1840O 2760 G 100.0 3000.0 800.0 1

6.91608165E+03 1.16761936E+01-7.50959119E-03 2.15441062E-06-2.35359847E-10 2

-1.42896930E+08-3.77768062E+04-8.09014070E+02 2.78010099E+01 8.62903464E-03 3

-5.76480275E-05 3.66674001E-08-1.40925809E+08 2.22568603E+03 4

(B2O3)921 021221B 1842O 2763 G 100.0 3000.0 800.0 1

6.92378935E+03 1.16885785E+01-7.51757873E-03 2.15670414E-06-2.35610321E-10 2

-1.43052854E+08-3.78189057E+04-8.09896354E+02 2.78315602E+01 8.63749255E-03 3

-5.77093673E-05 3.67064878E-08-1.41079544E+08 2.22804432E+03 4

(B2O3)922 021221B 1844O 2766 G 100.0 3000.0 800.0 1

6.93128976E+03 1.17012485E+01-7.52577613E-03 2.15907519E-06-2.35871155E-10 2

-1.43208714E+08-3.78598379E+04-8.10804943E+02 2.78625923E+01 8.64337834E-03 3

-5.77670562E-05 3.67439631E-08-1.41233279E+08 2.23051271E+03 4

(B2O3)923 021221B 1846O 2769 G 100.0 3000.0 800.0 1

6.93869266E+03 1.17142102E+01-7.53407478E-03 2.16143003E-06-2.36125287E-10 2

-1.43364548E+08-3.79002657E+04-8.11715935E+02 2.78936231E+01 8.64971516E-03 3

-5.78255126E-05 3.67818614E-08-1.41387014E+08 2.23299306E+03 4

(B2O3)924 021221B 1848O 2772 G 100.0 3000.0 800.0 1

6.94650333E+03 1.17262264E+01-7.54178271E-03 2.16365023E-06-2.36369911E-10 2

-1.43520521E+08-3.79429006E+04-8.12535576E+02 2.79228000E+01 8.66357852E-03 3

-5.78950312E-05 3.68251383E-08-1.41540763E+08 2.23520393E+03 4

(B2O3)925 021221B 1850O 2775 G 100.0 3000.0 800.0 1

6.95405576E+03 1.17387765E+01-7.54983332E-03 2.16594708E-06-2.36618944E-10 2

-1.43676386E+08-3.79840981E+04-8.13441719E+02 2.79535680E+01 8.67176912E-03 3

-5.79571747E-05 3.68651319E-08-1.41694500E+08 2.23765426E+03 4

(B2O3)926 021221B 1852O 2778 G 100.0 3000.0 800.0 1

6.96147329E+03 1.17515702E+01-7.55806129E-03 2.16831957E-06-2.36879912E-10 2

-1.43832237E+08-3.80246223E+04-8.14318108E+02 2.79843126E+01 8.67740483E-03 3

-5.80133086E-05 3.69015301E-08-1.41848239E+08 2.24000559E+03 4

(B2O3)927 021221B 1854O 2781 G 100.0 3000.0 800.0 1

6.96908681E+03 1.17641158E+01-7.56610898E-03 2.17061910E-06-2.37130151E-10 2

-1.43988135E+08-3.80662704E+04-8.15187487E+02 2.80138999E+01 8.69078623E-03 3

-5.80830849E-05 3.69453174E-08-1.42001966E+08 2.24236329E+03 4

(B2O3)928 021221B 1856O 2784 G 100.0 3000.0 800.0 1

6.97649258E+03 1.17770650E+01-7.57447753E-03 2.17302820E-06-2.37393815E-10 2

-1.44143978E+08-3.81067147E+04-8.16111315E+02 2.80453287E+01 8.69481770E-03 3

-5.81376188E-05 3.69811003E-08-1.42155707E+08 2.24487446E+03 4

(B2O3)929 021221B 1858O 2787 G 100.0 3000.0 800.0 1

6.98415694E+03 1.17895583E+01-7.58258692E-03 2.17537495E-06-2.37652074E-10 2

-1.44299895E+08-3.81485548E+04-8.16933680E+02 2.80750790E+01 8.70648561E-03 3

-5.82040303E-05 3.70229025E-08-1.42309447E+08 2.24705837E+03 4

(B2O3)930 021221B 1860O 2790 G 100.0 3000.0 800.0 1

6.99171885E+03 1.18020812E+01-7.59061636E-03 2.17767297E-06-2.37902843E-10 2

-1.44455784E+08-3.81898341E+04-8.17821042E+02 2.81058278E+01 8.71310323E-03 3

-5.82622166E-05 3.70604016E-08-1.42463189E+08 2.24944837E+03 4

(B2O3)931 021221B 1862O 2793 G 100.0 3000.0 800.0 1

6.99930469E+03 1.18144182E+01-7.59847613E-03 2.17991451E-06-2.38146935E-10 2

-1.44611670E+08-3.82312055E+04-8.18687857E+02 2.81357033E+01 8.72440842E-03 3

-5.83288307E-05 3.71026635E-08-1.42616932E+08 2.25181489E+03 4

(B2O3)932 021221B 1864O 2796 G 100.0 3000.0 800.0 1

7.00665535E+03 1.18275754E+01-7.60699711E-03 2.18235745E-06-2.38412758E-10 2

-1.44767501E+08-3.82714555E+04-8.19567772E+02 2.81663338E+01 8.73135074E-03 3

-5.83870354E-05 3.71400124E-08-1.42770664E+08 2.25415505E+03 4

(B2O3)933 021221B 1866O 2799 G 100.0 3000.0 800.0 1

7.01425405E+03 1.18401256E+01-7.61512147E-03 2.18470930E-06-2.38671565E-10 2

-1.44923394E+08-3.83129019E+04-8.20467096E+02 2.81973147E+01 8.73822232E-03 3

-5.84468053E-05 3.71787242E-08-1.42924408E+08 2.25658279E+03 4

(B2O3)934 021221B 1868O 2802 G 100.0 3000.0 800.0 1

7.02181076E+03 1.18526505E+01-7.62312817E-03 2.18699115E-06-2.38919663E-10 2

-1.45079269E+08-3.83540853E+04-8.21397794E+02 2.82287133E+01 8.74315772E-03 3

-5.85033759E-05 3.72156784E-08-1.43078153E+08 2.25912873E+03 4

(B2O3)935 021221B 1870O 2805 G 100.0 3000.0 800.0 1

7.02938340E+03 1.18652840E+01-7.63124435E-03 2.18932180E-06-2.39175094E-10 2

-1.45235167E+08-3.83955115E+04-8.22211808E+02 2.82582215E+01 8.75481111E-03 3

-5.85686943E-05 3.72566108E-08-1.43231887E+08 2.26126570E+03 4

(B2O3)936 021221B 1872O 2808 G 100.0 3000.0 800.0 1

7.03687199E+03 1.18778493E+01-7.63925844E-03 2.19160004E-06-2.39421945E-10 2

-1.45391018E+08-3.84363136E+04-8.23058827E+02 2.82882779E+01 8.76511330E-03 3

-5.86337336E-05 3.72980802E-08-1.43385634E+08 2.26354695E+03 4

(B2O3)937 021221B 1874O 2811 G 100.0 3000.0 800.0 1

7.04419195E+03 1.18910205E+01-7.64782334E-03 2.19407926E-06-2.39694159E-10 2

-1.45546856E+08-3.84764158E+04-8.23897464E+02 2.83182805E+01 8.77353235E-03 3

-5.86933358E-05 3.73359169E-08-1.43539370E+08 2.26577482E+03 4

(B2O3)938 021221B 1876O 2814 G 100.0 3000.0 800.0 1

7.05193912E+03 1.19032263E+01-7.65562624E-03 2.19630318E-06-2.39935920E-10 2

-1.45702782E+08-3.85186802E+04-8.24816222E+02 2.83490562E+01 8.78233459E-03 3

-5.87566577E-05 3.73765496E-08-1.43693107E+08 2.26827001E+03 4

(B2O3)939 021221B 1878O 2817 G 100.0 3000.0 800.0 1

7.05954532E+03 1.19156484E+01-7.66361238E-03 2.19860339E-06-2.40188611E-10 2

-1.45858684E+08-3.85601423E+04-8.25614563E+02 2.83790556E+01 8.79098255E-03 3

-5.88170468E-05 3.74148560E-08-1.43846856E+08 2.27035488E+03 4

(B2O3)940 021221B 1880O 2820 G 100.0 3000.0 800.0 1

7.06702394E+03 1.19285889E+01-7.67199916E-03 2.20102418E-06-2.40454399E-10 2

-1.46014558E+08-3.86010590E+04-8.26517051E+02 2.84097166E+01 8.79916781E-03 3

-5.88783486E-05 3.74542009E-08-1.44000594E+08 2.27280229E+03 4

(B2O3)941 021221B 1882O 2823 G 100.0 3000.0 800.0 1

7.07449782E+03 1.19412942E+01-7.68016222E-03 2.20335851E-06-2.40708437E-10 2

-1.46170412E+08-3.86418552E+04-8.27449728E+02 2.84409795E+01 8.80438101E-03 3

-5.89351588E-05 3.74912557E-08-1.44154333E+08 2.27534777E+03 4

(B2O3)942 021221B 1884O 2826 G 100.0 3000.0 800.0 1

7.08200498E+03 1.19538841E+01-7.68821229E-03 2.20565590E-06-2.40958301E-10 2

-1.46326276E+08-3.86827681E+04-8.28294905E+02 2.84710432E+01 8.81492540E-03 3

-5.90007764E-05 3.75331086E-08-1.44308085E+08 2.27761725E+03 4

(B2O3)943 021221B 1886O 2829 G 100.0 3000.0 800.0 1

7.08956587E+03 1.19664992E+01-7.69635793E-03 2.20800476E-06-2.41216396E-10 2

-1.46482184E+08-3.87241458E+04-8.29092963E+02 2.85006182E+01 8.82487108E-03 3

-5.90623471E-05 3.75717651E-08-1.44461826E+08 2.27968280E+03 4

(B2O3)944 021221B 1888O 2832 G 100.0 3000.0 800.0 1

7.09728873E+03 1.19787186E+01-7.70417415E-03 2.21023829E-06-2.41459746E-10 2

-1.46638108E+08-3.87662490E+04-8.29980819E+02 2.85310862E+01 8.83427731E-03 3

-5.91260624E-05 3.76124282E-08-1.44615567E+08 2.28209533E+03 4

(B2O3)945 021221B 1890O 2835 G 100.0 3000.0 800.0 1

7.10466912E+03 1.19916912E+01-7.71253544E-03 2.21263587E-06-2.41721051E-10 2

-1.46793940E+08-3.88065578E+04-8.30900014E+02 2.85623923E+01 8.83900726E-03 3

-5.91818432E-05 3.76488897E-08-1.44769310E+08 2.28457867E+03 4

(B2O3)946 021221B 1892O 2838 G 100.0 3000.0 800.0 1

7.11226213E+03 1.20042247E+01-7.72060660E-03 2.21495904E-06-2.41975934E-10 2

-1.46949844E+08-3.88480369E+04-8.31651568E+02 2.85910334E+01 8.85425774E-03 3

-5.92530174E-05 3.76929789E-08-1.44923053E+08 2.28653349E+03 4

(B2O3)947 021221B 1894O 2841 G 100.0 3000.0 800.0 1

7.11964281E+03 1.20170422E+01-7.72874957E-03 2.21725985E-06-2.42223704E-10 2

-1.47105665E+08-3.88882872E+04-8.32645193E+02 2.86232425E+01 8.85588097E-03 3

-5.93048084E-05 3.77276572E-08-1.45076797E+08 2.28927897E+03 4

(B2O3)948 021221B 1896O 2844 G 100.0 3000.0 800.0 1

7.12736957E+03 1.20293144E+01-7.73671763E-03 2.21957471E-06-2.42479571E-10 2

-1.47261607E+08-3.89304662E+04-8.33507811E+02 2.86536052E+01 8.86465950E-03 3

-5.93667710E-05 3.77672186E-08-1.45230542E+08 2.29157807E+03 4

(B2O3)949 021221B 1898O 2847 G 100.0 3000.0 800.0 1

7.13482672E+03 1.20421935E+01-7.74503680E-03 2.22196361E-06-2.42740227E-10 2

-1.47417469E+08-3.89712034E+04-8.34363416E+02 2.86839094E+01 8.87339127E-03 3

-5.94281475E-05 3.78062839E-08-1.45384288E+08 2.29386757E+03 4

(B2O3)950 021221B 1900O 2850 G 100.0 3000.0 800.0 1

7.14243473E+03 1.20546771E+01-7.75306641E-03 2.22426692E-06-2.42991875E-10 2

-1.47573376E+08-3.90127285E+04-8.35178916E+02 2.87136002E+01 8.88460942E-03 3

-5.94935528E-05 3.78475510E-08-1.45538034E+08 2.29602944E+03 4

(B2O3)951 021221B 1902O 2853 G 100.0 3000.0 800.0 1

7.14999927E+03 1.20671593E+01-7.76098306E-03 2.22651233E-06-2.43235440E-10 2

-1.47729248E+08-3.90540181E+04-8.36120806E+02 2.87446900E+01 8.89136994E-03 3

-5.95532072E-05 3.78861739E-08-1.45691769E+08 2.29860364E+03 4

(B2O3)952 021221B 1904O 2856 G 100.0 3000.0 800.0 1

7.15740081E+03 1.20800134E+01-7.76923032E-03 2.22887080E-06-2.43492302E-10 2

-1.47885096E+08-3.90944330E+04-8.36929028E+02 2.87746487E+01 8.90012739E-03 3

-5.96138550E-05 3.79247408E-08-1.45845518E+08 2.30072012E+03 4

(B2O3)953 021221B 1906O 2859 G 100.0 3000.0 800.0 1

7.16481762E+03 1.20928746E+01-7.77753850E-03 2.23126392E-06-2.43754065E-10 2

-1.48040938E+08-3.91349010E+04-8.37887027E+02 2.88064627E+01 8.90331725E-03 3

-5.96679683E-05 3.79605755E-08-1.45999266E+08 2.30334037E+03 4

(B2O3)954 021221B 1908O 2862 G 100.0 3000.0 800.0 1

7.17250915E+03 1.21053882E+01-7.78563837E-03 2.23359705E-06-2.44009873E-10 2

-1.48196870E+08-3.91769389E+04-8.38740956E+02 2.88363099E+01 8.91530234E-03 3

-5.97351571E-05 3.80028477E-08-1.46153004E+08 2.30564161E+03 4

(B2O3)955 021221B 1910O 2865 G 100.0 3000.0 800.0 1

7.17985543E+03 1.21184742E+01-7.79412774E-03 2.23604705E-06-2.44278551E-10 2

-1.48352720E+08-3.92171313E+04-8.39637326E+02 2.88670856E+01 8.92148164E-03 3

-5.97923884E-05 3.80398343E-08-1.46306755E+08 2.30807310E+03 4

(B2O3)956 021221B 1912O 2868 G 100.0 3000.0 800.0 1

7.18744938E+03 1.21308738E+01-7.80205886E-03 2.23831318E-06-2.44525621E-10 2

-1.48508634E+08-3.92586580E+04-8.40489919E+02 2.88965893E+01 8.93382941E-03 3

-5.98597054E-05 3.80820953E-08-1.46460506E+08 2.31035847E+03 4

(B2O3)957 021221B 1914O 2871 G 100.0 3000.0 800.0 1

7.19508381E+03 1.21433651E+01-7.81009355E-03 2.24062414E-06-2.44778888E-10 2

-1.48664550E+08-3.93003638E+04-8.41408729E+02 2.89274341E+01 8.94117795E-03 3

-5.99196818E-05 3.81207003E-08-1.46614246E+08 2.31287366E+03 4

(B2O3)958 021221B 1916O 2874 G 100.0 3000.0 800.0 1

7.20254804E+03 1.21560914E+01-7.81827338E-03 2.24296760E-06-2.45034195E-10 2

-1.48820412E+08-3.93411606E+04-8.42241074E+02 2.89569789E+01 8.95296320E-03 3

-5.99858605E-05 3.81623087E-08-1.46767987E+08 2.31510007E+03 4

(B2O3)959 021221B 1918O 2877 G 100.0 3000.0 800.0 1

7.21020506E+03 1.21685729E+01-7.82629789E-03 2.24526815E-06-2.45285867E-10 2

-1.48976349E+08-3.93830015E+04-8.43162958E+02 2.89877777E+01 8.96070836E-03 3

-6.00463926E-05 3.82011264E-08-1.46921741E+08 2.31762842E+03 4

(B2O3)960 021221B 1920O 2880 G 100.0 3000.0 800.0 1

7.21766759E+03 1.21814211E+01-7.83460600E-03 2.24765156E-06-2.45545439E-10 2

-1.49132202E+08-3.94237180E+04-8.44033673E+02 2.90186082E+01 8.96733600E-03 3

-6.01050035E-05 3.82389958E-08-1.47075483E+08 2.31995651E+03 4

(B2O3)961 021221B 1922O 2883 G 100.0 3000.0 800.0 1

7.22517550E+03 1.21939351E+01-7.84257115E-03 2.24992381E-06-2.45792917E-10 2

-1.49288070E+08-3.94646254E+04-8.44884723E+02 2.90493289E+01 8.97344562E-03 3

-6.01622670E-05 3.82760238E-08-1.47229239E+08 2.32219995E+03 4

(B2O3)962 021221B 1924O 2886 G 100.0 3000.0 800.0 1

7.23290219E+03 1.22062402E+01-7.85049831E-03 2.25219847E-06-2.46041476E-10 2

-1.49444002E+08-3.95067915E+04-8.45766568E+02 2.90796715E+01 8.98370785E-03 3

-6.02275416E-05 3.83175785E-08-1.47382983E+08 2.32457577E+03 4

(B2O3)963 021221B 1926O 2889 G 100.0 3000.0 800.0 1

7.24028949E+03 1.22190879E+01-7.85878594E-03 2.25458669E-06-2.46303498E-10 2

-1.49599861E+08-3.95472230E+04-8.46680131E+02 2.91101584E+01 8.99121228E-03 3

-6.02869947E-05 3.83557571E-08-1.47536728E+08 2.32708534E+03 4

(B2O3)964 021221B 1928O 2892 G 100.0 3000.0 800.0 1

7.24788714E+03 1.22316886E+01-7.86691236E-03 2.25692258E-06-2.46558942E-10 2

-1.49755761E+08-3.95887042E+04-8.47581182E+02 2.91408450E+01 8.99963162E-03 3

-6.03489691E-05 3.83954617E-08-1.47690473E+08 2.32953512E+03 4

(B2O3)965 021221B 1930O 2895 G 100.0 3000.0 800.0 1

7.25552553E+03 1.22440848E+01-7.87487070E-03 2.25921364E-06-2.46810773E-10 2

-1.49911687E+08-3.96304451E+04-8.48358534E+02 2.91699307E+01 9.01252452E-03 3

-6.04160731E-05 3.84373230E-08-1.47844220E+08 2.33155710E+03 4

(B2O3)966 021221B 1932O 2898 G 100.0 3000.0 800.0 1

7.26297851E+03 1.22569379E+01-7.88314491E-03 2.26157986E-06-2.47068194E-10 2

-1.50067550E+08-3.96711484E+04-8.49206432E+02 2.92002600E+01 9.02063985E-03 3

-6.04760739E-05 3.84755483E-08-1.47997967E+08 2.33381970E+03 4

(B2O3)967 021221B 1934O 2901 G 100.0 3000.0 800.0 1

7.27057836E+03 1.22694900E+01-7.89123537E-03 2.26389718E-06-2.47320441E-10 2

-1.50223452E+08-3.97125773E+04-8.50187911E+02 2.92322132E+01 9.02478458E-03 3

-6.05328349E-05 3.85130844E-08-1.48151727E+08 2.33653073E+03 4

(B2O3)968 021221B 1936O 2904 G 100.0 3000.0 800.0 1

7.27817127E+03 1.22819448E+01-7.89919872E-03 2.26617533E-06-2.47569202E-10 2

-1.50379343E+08-3.97539813E+04-8.51078525E+02 2.92628419E+01 9.03311326E-03 3

-6.05947652E-05 3.85528557E-08-1.48305476E+08 2.33894344E+03 4

(B2O3)969 021221B 1938O 2907 G 100.0 3000.0 800.0 1

7.28547407E+03 1.22950345E+01-7.90763174E-03 2.26860932E-06-2.47836851E-10 2

-1.50535174E+08-3.97939830E+04-8.51806951E+02 2.92914299E+01 9.04615751E-03 3

-6.06604462E-05 3.85935109E-08-1.48459214E+08 2.34079037E+03 4

(B2O3)970 021221B 1940O 2910 G 100.0 3000.0 800.0 1

7.29308752E+03 1.23075171E+01-7.91562332E-03 2.27088587E-06-2.48083946E-10 2

-1.50691076E+08-3.98355255E+04-8.52746802E+02 2.93226945E+01 9.05243977E-03 3

-6.07196048E-05 3.86319533E-08-1.48612964E+08 2.34335331E+03 4

(B2O3)971 021221B 1942O 2913 G 100.0 3000.0 800.0 1

7.30061152E+03 1.23203036E+01-7.92391866E-03 2.27327232E-06-2.48344464E-10 2

-1.50846956E+08-3.98766038E+04-8.53664947E+02 2.93537781E+01 9.05940141E-03 3

-6.07797237E-05 3.86708595E-08-1.48766715E+08 2.34584440E+03 4

(B2O3)972 021221B 1944O 2916 G 100.0 3000.0 800.0 1

7.30813799E+03 1.23329460E+01-7.93212035E-03 2.27564544E-06-2.48605459E-10 2

-1.51002862E+08-3.99177468E+04-8.54611786E+02 2.93850290E+01 9.06383475E-03 3

-6.08343219E-05 3.87064126E-08-1.48920467E+08 2.34846802E+03 4

(B2O3)973 021221B 1946O 2919 G 100.0 3000.0 800.0 1

7.31585567E+03 1.23450863E+01-7.93981724E-03 2.27783862E-06-2.48844700E-10 2

-1.51158796E+08-3.99598445E+04-8.55423190E+02 2.94142966E+01 9.07768029E-03 3

-6.09044822E-05 3.87503265E-08-1.49074220E+08 2.35061561E+03 4

(B2O3)974 021221B 1948O 2922 G 100.0 3000.0 800.0 1

7.32322795E+03 1.23580798E+01-7.94821924E-03 2.28024722E-06-2.49106913E-10 2

-1.51314637E+08-4.00000957E+04-8.56370319E+02 2.94459205E+01 9.08150333E-03 3

-6.09594281E-05 3.87865792E-08-1.49227974E+08 2.35320934E+03 4

(B2O3)975 021221B 1950O 2925 G 100.0 3000.0 800.0 1

7.33065368E+03 1.23709894E+01-7.95657230E-03 2.28265930E-06-2.49371852E-10 2

-1.51470505E+08-4.00407443E+04-8.57213760E+02 2.94756273E+01 9.09224026E-03 3

-6.10234978E-05 3.88269698E-08-1.49381716E+08 2.35547349E+03 4

(B2O3)976 021221B 1952O 2928 G 100.0 3000.0 800.0 1

7.33833125E+03 1.23833056E+01-7.96447166E-03 2.28491645E-06-2.49617465E-10 2

-1.51626431E+08-4.00826149E+04-8.58009541E+02 2.95050875E+01 9.10453803E-03 3

-6.10904940E-05 3.88689354E-08-1.49535471E+08 2.35756249E+03 4

(B2O3)977 021221B 1954O 2931 G 100.0 3000.0 800.0 1

7.34594434E+03 1.23957700E+01-7.97242976E-03 2.28718856E-06-2.49865111E-10 2

-1.51782337E+08-4.01241190E+04-8.58899526E+02 2.95360319E+01 9.11131473E-03 3

-6.11498603E-05 3.89073784E-08-1.49689227E+08 2.35995673E+03 4

(B2O3)978 021221B 1956O 2934 G 100.0 3000.0 800.0 1

7.35337051E+03 1.24085275E+01-7.98061036E-03 2.28952637E-06-2.50119655E-10 2

-1.51938198E+08-4.01647242E+04-8.59759927E+02 2.95663320E+01 9.11869471E-03 3

-6.12082093E-05 3.89446369E-08-1.49842971E+08 2.36224646E+03 4

(B2O3)979 021221B 1958O 2937 G 100.0 3000.0 800.0 1

7.36093063E+03 1.24211938E+01-7.98884084E-03 2.29191540E-06-2.50383252E-10 2

-1.52094088E+08-4.02059513E+04-8.60665577E+02 2.95972137E+01 9.12681989E-03 3

-6.12707251E-05 3.89850400E-08-1.49996729E+08 2.36471641E+03 4

(B2O3)980 021221B 1960O 2940 G 100.0 3000.0 800.0 1

7.36833513E+03 1.24341361E+01-7.99714462E-03 2.29428653E-06-2.50640970E-10 2

-1.52249950E+08-4.02464771E+04-8.61637177E+02 2.96286108E+01 9.13171010E-03 3

-6.13269090E-05 3.90217654E-08-1.50150475E+08 2.36740207E+03 4

(B2O3)981 021221B 1962O 2943 G 100.0 3000.0 800.0 1

7.37617916E+03 1.24460994E+01-8.00481540E-03 2.29648745E-06-2.50882004E-10 2

-1.52405923E+08-4.02891949E+04-8.62424220E+02 2.96580960E+01 9.14411578E-03 3

-6.13942616E-05 3.90639463E-08-1.50304234E+08 2.36946404E+03 4

(B2O3)982 021221B 1964O 2946 G 100.0 3000.0 800.0 1

7.38356067E+03 1.24590623E+01-8.01318999E-03 2.29889555E-06-2.51145300E-10 2

-1.52561779E+08-4.03295988E+04-8.63260683E+02 2.96879961E+01 9.15340189E-03 3

-6.14556673E-05 3.91028384E-08-1.50457982E+08 2.37167434E+03 4

(B2O3)983 021221B 1966O 2949 G 100.0 3000.0 800.0 1

7.39105592E+03 1.24717732E+01-8.02139754E-03 2.30126024E-06-2.51404598E-10 2

-1.52717649E+08-4.03704252E+04-8.64103617E+02 2.97190111E+01 9.15837574E-03 3

-6.15112379E-05 3.91390089E-08-1.50611742E+08 2.37388134E+03 4

(B2O3)984 021221B 1968O 2952 G 100.0 3000.0 800.0 1

7.39866961E+03 1.24842246E+01-8.02932632E-03 2.30351218E-06-2.51648783E-10 2

-1.52873565E+08-4.04120292E+04-8.65072916E+02 2.97500175E+01 9.16606423E-03 3

-6.15725970E-05 3.91785910E-08-1.50765491E+08 2.37658782E+03 4

(B2O3)985 021221B 1970O 2955 G 100.0 3000.0 800.0 1

7.40620390E+03 1.24967366E+01-8.03735115E-03 2.30581555E-06-2.51900520E-10 2

-1.53029444E+08-4.04531387E+04-8.65921762E+02 2.97797496E+01 9.17798143E-03 3

-6.16401857E-05 3.92213785E-08-1.50919241E+08 2.37887976E+03 4

(B2O3)986 021221B 1972O 2958 G 100.0 3000.0 800.0 1

7.41361192E+03 1.25097416E+01-8.04579982E-03 2.30825139E-06-2.52167176E-10 2

-1.53185319E+08-4.04936873E+04-8.66708516E+02 2.98094582E+01 9.18669041E-03 3

-6.16991821E-05 3.92584757E-08-1.51072992E+08 2.38091510E+03 4

(B2O3)987 021221B 1974O 2961 G 100.0 3000.0 800.0 1

7.42131910E+03 1.25220720E+01-8.05373739E-03 2.31053631E-06-2.52417955E-10 2

-1.53341250E+08-4.05357317E+04-8.67641182E+02 2.98406464E+01 9.19351282E-03 3

-6.17593488E-05 3.92974887E-08-1.51226743E+08 2.38345312E+03 4

(B2O3)988 021221B 1976O 2964 G 100.0 3000.0 800.0 1

7.42893604E+03 1.25343552E+01-8.06150251E-03 2.31272922E-06-2.52654829E-10 2

-1.53497158E+08-4.05772356E+04-8.68525163E+02 2.98710820E+01 9.20284277E-03 3

-6.18233084E-05 3.93385319E-08-1.51380508E+08 2.38584517E+03 4

(B2O3)989 021221B 1978O 2967 G 100.0 3000.0 800.0 1

7.43626575E+03 1.25475677E+01-8.07012948E-03 2.31523202E-06-2.52929987E-10 2

-1.53653010E+08-4.06173674E+04-8.69354644E+02 2.99010204E+01 9.21198298E-03 3

-6.18843630E-05 3.93771942E-08-1.51534260E+08 2.38804801E+03 4

(B2O3)990 021221B 1980O 2970 G 100.0 3000.0 800.0 1

7.44378537E+03 1.25600388E+01-8.07801743E-03 2.31745872E-06-2.53169904E-10 2

-1.53808873E+08-4.06583225E+04-8.70205391E+02 2.99312508E+01 9.22146921E-03 3

-6.19479531E-05 3.94178276E-08-1.51688014E+08 2.39032576E+03 4

(B2O3)991 021221B 1982O 2973 G 100.0 3000.0 800.0 1

7.45151701E+03 1.25723721E+01-8.08598387E-03 2.31975593E-06-2.53422365E-10 2

-1.53964830E+08-4.07005570E+04-8.71091294E+02 2.99618019E+01 9.22989217E-03 3

-6.20093600E-05 3.94570540E-08-1.51841768E+08 2.39270686E+03 4

(B2O3)992 021221B 1984O 2976 G 100.0 3000.0 800.0 1

7.45881411E+03 1.25856687E+01-8.09462571E-03 2.32225050E-06-2.53695766E-10 2

-1.54120669E+08-4.07404835E+04-8.71997715E+02 2.99929936E+01 9.23442182E-03 3

-6.20638819E-05 3.94925477E-08-1.51995524E+08 2.39515509E+03 4

(B2O3)993 021221B 1986O 2979 G 100.0 3000.0 800.0 1

7.46649002E+03 1.25979485E+01-8.10249320E-03 2.32450768E-06-2.53942818E-10 2

-1.54276588E+08-4.07823228E+04-8.72907791E+02 3.00238754E+01 9.24227081E-03 3

-6.21257360E-05 3.95325125E-08-1.52149280E+08 2.39762282E+03 4

(B2O3)994 021221B 1988O 2982 G 100.0 3000.0 800.0 1

7.47395179E+03 1.26107970E+01-8.11085693E-03 2.32692559E-06-2.54207952E-10 2

-1.54432463E+08-4.08230674E+04-8.73792851E+02 3.00547680E+01 9.24845808E-03 3

-6.21835810E-05 3.95699756E-08-1.52303036E+08 2.40000346E+03 4

(B2O3)995 021221B 1990O 2985 G 100.0 3000.0 800.0 1

7.48138127E+03 1.26236958E+01-8.11919028E-03 2.32933136E-06-2.54472359E-10 2

-1.54588342E+08-4.08637998E+04-8.74479297E+02 3.00824107E+01 9.26608622E-03 3

-6.22564954E-05 3.96143141E-08-1.52456781E+08 2.40170727E+03 4

(B2O3)996 021221B 1992O 2988 G 100.0 3000.0 800.0 1

7.48911495E+03 1.26358043E+01-8.12690261E-03 2.33152726E-06-2.54711220E-10 2

-1.54744285E+08-4.09059347E+04-8.75422411E+02 3.01137028E+01 9.27190683E-03 3

-6.23148039E-05 3.96522764E-08-1.52610540E+08 2.40431037E+03 4

(B2O3)997 021221B 1994O 2991 G 100.0 3000.0 800.0 1

7.49665944E+03 1.26483881E+01-8.13492573E-03 2.33380764E-06-2.54958462E-10 2

-1.54900172E+08-4.09470693E+04-8.76313820E+02 3.01444819E+01 9.27963161E-03 3

-6.23758634E-05 3.96916556E-08-1.52764299E+08 2.40672313E+03 4

(B2O3)998 021221B 1996O 2994 G 100.0 3000.0 800.0 1

7.50403532E+03 1.26614557E+01-8.14339970E-03 2.33624759E-06-2.55224942E-10 2

-1.55056028E+08-4.09873725E+04-8.77170750E+02 3.01751833E+01 9.28582259E-03 3

-6.24327355E-05 3.97282739E-08-1.52918058E+08 2.40899882E+03 4

(B2O3)999 021221B 1998O 2997 G 100.0 3000.0 800.0 1

7.51160630E+03 1.26740426E+01-8.15150788E-03 2.33857891E-06-2.55480417E-10 2

-1.55211934E+08-4.10287045E+04-8.78074676E+02 3.02059610E+01 9.29363544E-03 3

-6.24939227E-05 3.97677015E-08-1.53071819E+08 2.41144784E+03 4

(B2O3)1000 021221B 2000O 3000 G 100.0 3000.0 800.0 1

7.51927472E+03 1.26863604E+01-8.15939643E-03 2.34084083E-06-2.55727865E-10 2

-1.55367857E+08-4.10705517E+04-8.79006494E+02 3.02371281E+01 9.29969132E-03 3

-6.25522558E-05 3.98055914E-08-1.53225568E+08 2.41398452E+03 4

END
